# Supplementary material for: Neutrophil diversity is associated with T-cell immunity and clinical relevance in patients with thyroid cancer
Source: Springer Nature journal article supplement (doi:10.1038/s41420-024-01970-z), 2024-05-08

Supplementary Figure 3.

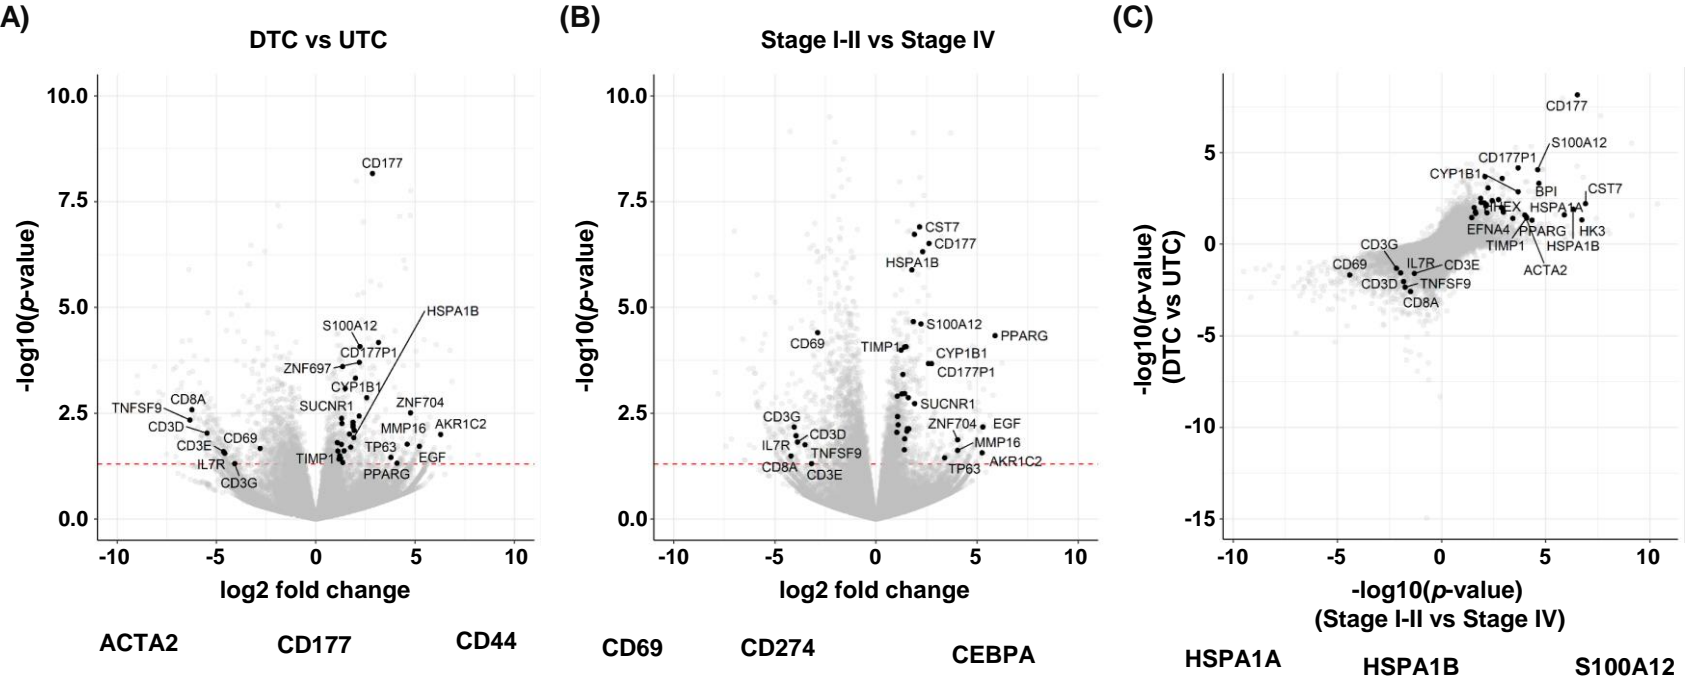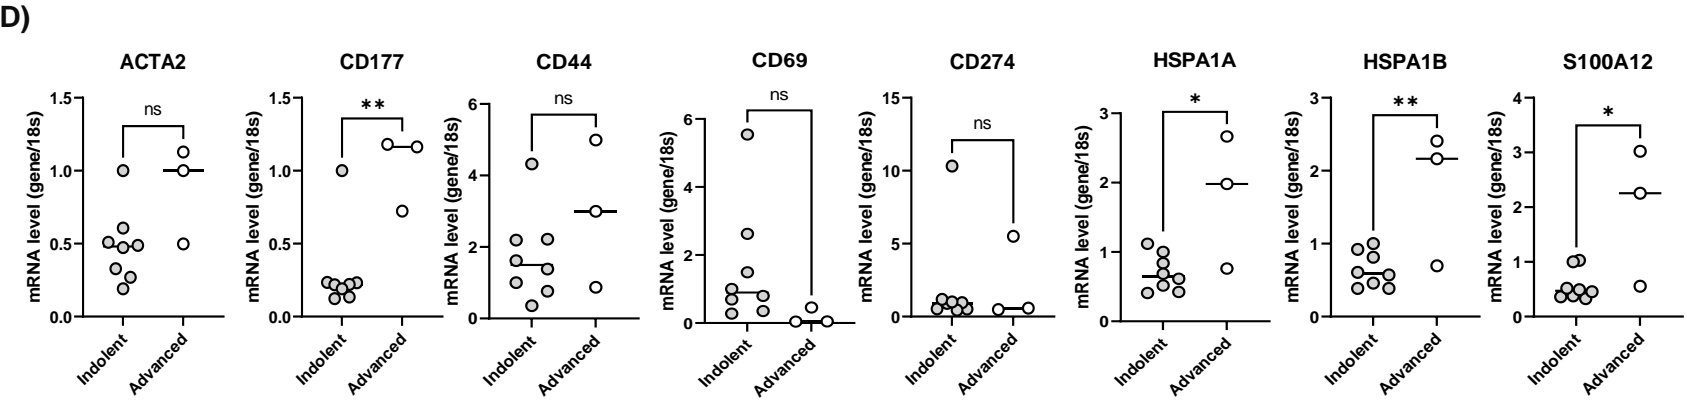

Supplement: MOESM4 [file 41420_2024_1970_MOESM4_ESM.pdf]
