# Supplementary material for: Neutrophil diversity is associated with T-cell immunity and clinical relevance in patients with thyroid cancer
Source: Cell Death Discov. 2024 May 8;10:222. doi: 10.1038/s41420-024-01970-z (PMC11078953; doi:10.1038/s41420-024-01970-z)
Supplement: Supplementary file 1 — supplementary data [file 41420_2024_1970_MOESM1_ESM.xlsx]

## Sheet: Description of supple. data
Description of Additional Supplementary Data
Supplementary Data1. Characteristics of participants in this study.
Supplementary Data2. Differential expressed genes in circulating high density neutrophils from patients with thyroid cancer compared to healthy controls.
Supplementary Data3. Differential expressed genes in circulating high density neutrophils from patients with undifferentiated thyroid cancer compared to patients with differentiated thyeoid cancer.
Supplementary Data4. Differential expressed genes in circulating high density neutrophils from stage Ⅳ patients compared to stageⅠ-Ⅱ patients.
Supplementary Data5. Characteristics of participants in this study.

## Sheet: Supplementary Data 1.
Patient ID	Gender	Age	Diagnosis	Tumor size(cm)	Lymph node metastasis	Extrathyroidal extension	Distant metastasis	Stage	Group	FACS analysis	RNA seq	RNAseq_sample_id
1	Male	56	ATC	4.8	Present	Trachea, Esophagus	Lung, bone	stage IV	UTC	O	O	D1_h
2	Male	86	ATC	7	Present	Trachea, Esophagus	Lung, bone	stage IV	UTC	O	O	D2_h
3	Male	64	PD	11	Present	Trachea	Lung, bone	stage IV	UTC	O	X
4	Male	27	PTC	2.5	Present	Only strap muscle invasion	Lung	stage IV	DTC	O	O	D3_h
5	Male	87	PTC	4	Present	Trachea	Lung, bone	stage IV	DTC	O	X
6	Female	84	PTC	5	Present	Trachea, Esophagus	Bone	stage IV	DTC	O	O	D6_h
7	Male	58	PTC	4.5	Present	Trachea	Lung	stage IV	DTC	O	X
8	Male	53	PTC	0.2	Absent	Absent	Absent	stage I	DTC	O	O	C1_h
9	Female	49	PTC	0.4	Present	Absent	Absent	stage II	DTC	O	O	C2_h
10	Female	52	PTC	1.2	Absent	Absent	Absent	stage I	DTC	O	O	C3_h
11	Male	51	PTC	0.7	Absent	Absent	Absent	stage I	DTC	O	O	C4_h
12	Male	50	PTC	2.8	Present	Only strap muscle invasion	Absent	stage II	DTC	O	O	C5_h
13	Male	23	PTC	1	Present	Absent	Absent	stage II	DTC	O	O	C6_h
14	Female	64	PTC	1	Absent	Absent	Absent	stage I	DTC	O	O	C7_h
15	Male	63	PTC	1	Absent	Absent	Absent	stage I	DTC	O	X
16	Female	67	PTC	0.7	Present	Absent	Absent	stage II	DTC	O	X
17	Female	59	PTC	0.4	Present	Absent	Absent	stage II	DTC	O	X
18	Female	31	Healthy Control					Normal		O	O	HC1_h
19	Female	35	Healthy Control					Normal		O	O	HC2_h
20	Female	35	Healthy Control					Normal		O	X
21	Female	32	Healthy Control					Normal		O	O	HC4_h
22	Male	30	Healthy Control					Normal		O	O	HC5_h
23	Male	27	Healthy Control					Normal		O	O	HC6_h
24	Male	31	Healthy Control					Normal		O	O	HC7_h
25	Female	43	Healthy Control					Normal		O	O	HC8_h
26	Male	26	Healthy Control					Normal		O	O	HC9_h
27	Female	29	Healthy Control					Normal		O	O	HC10_h

## Sheet: Supplementary Data 2.
Gene_name	baseMean	log2FoldChange	lfcSE	stat	pvalue
TRBV20-1	4.1827	5.48139	2.80371	1.95504	0.0505778
VSIG1	3.81885	5.3485	2.78362	1.92142	0.0546789
RN7SL166P	4.7148	5.31892	0.83974	6.334	2.38882e-10
LOC729999	16.7056	5.06488	0.96034	5.27405	1.33443e-07
LINC02399	2.81128	4.90799	1.50295	3.26558	0.00109242
LOC105370259	2.73797	4.86597	1.71198	2.8423	0.00447891
LOC100996447	6.53153	4.80388	1.07963	4.44958	8.6038e-06
FAM183DP	5.07464	4.76147	1.49145	3.19251	0.00141041
LINC02242	2.4896	4.72976	1.89783	2.49219	0.0126957
LINC02265	49.2876	4.68147	0.688437	6.80014	1.04518e-11
SLC6A15	2.39973	4.67474	1.92418	2.42947	0.0151209
RPL34P25	2.39361	4.66647	1.10776	4.21253	2.52524e-05
LOC105371464	2.36814	4.65879	1.75369	2.65657	0.00789406
LOC112267956	149.971	4.65703	0.796609	5.84607	5.03333e-09
LOC105371434	3.76046	4.64824	1.16611	3.98612	6.71631e-05
LOC101927089	2.34828	4.64803	1.68818	2.75329	0.00590005
HNRNPUL2-BSCL2	8.68302	4.60569	1.66789	2.76138	0.00575574
NECTIN3	2.18121	4.53914	1.53199	2.9629	0.00304758
ZASP	49.7277	4.51956	0.527576	8.56665	1.0654e-17
LOC105375417	2.06702	4.46465	1.32947	3.35823	0.000784446
ZFAT-AS1	2.04871	4.44958	1.22644	3.62805	0.00028557
HLA-V	7.3998	4.4311	1.2233	3.62227	0.000292034
SNORD144	13.9415	4.29805	0.574382	7.48291	7.26967e-14
LOC105377374	2.87065	4.24575	1.28271	3.30998	0.000933021
TRBV12-3	1.77496	4.24462	2.25329	1.88374	0.0595996
SLC38A4	1.72123	4.19814	1.52606	2.75097	0.00594199
LOC105377918	1.68561	4.16457	1.98918	2.09362	0.0362942
LOC107986940	2.70124	4.16095	1.3531	3.07512	0.00210417
RPSAP21	1.65762	4.1491	1.56334	2.654	0.00795437
SPACA6P-AS	1.661	4.14909	2.58936	1.60236	0.109075
LINC02621	1.62939	4.11567	1.99211	2.06599	0.0388296
ADAMTS20	1.60464	4.09429	1.98826	2.05924	0.0394717
LOC107986020	2.56558	4.08174	1.77539	2.29907	0.0215011
LOC105377982	2.55927	4.08069	2.83131	1.44127	0.149508
LOC105373531	1.58806	4.0803	1.9877	2.05278	0.0400942
LOC105370833	1.57402	4.07087	1.98725	2.04849	0.0405116
LRRIQ1	2.52595	4.06054	2.83191	1.43385	0.151614
RPL26P18	1.57202	4.0573	1.65573	2.45046	0.0142673
TRBV19	1.98575	4.05635	1.87823	2.15966	0.0307986
LOC105378214	1.55852	4.05141	2.00541	2.02024	0.0433582
LOC105375472	2.52664	4.05018	1.80364	2.24556	0.0247319
LOC105374997	1.50409	4.00959	2.04079	1.96473	0.0494458
LOC101928383	5.38286	3.97775	1.95735	2.03221	0.0421322
TUSC3	1.44887	3.95162	2.04619	1.93121	0.0534576
LOC112268263	1.45066	3.94558	2.02308	1.95028	0.0511424
NRG3	1.42551	3.92088	2.31194	1.69593	0.0898998
LOC107984276	1.41684	3.91034	1.79049	2.18395	0.0289658
LOC105376002	1.40749	3.90951	2.0458	1.91099	0.0560059
FNDC5	1.40156	3.90511	2.01797	1.93517	0.0529695
LOC107986572	1.39861	3.89541	1.45246	2.68195	0.00731946
LOC107985057	1.36799	3.86161	2.03811	1.8947	0.0581318
LOC112267972	1.3633	3.86141	1.42309	2.71339	0.0066598
LOX	1.35923	3.86135	2.32176	1.66312	0.0962893
LOC101927405	1.36376	3.85747	1.58047	2.4407	0.0146587
FAM186A	1.3587	3.85171	2.33	1.6531	0.098311
LOC107986079	3.48211	3.84773	1.09313	3.51991	0.000431695
RPL39P32	2.1667	3.8389	1.10312	3.48004	0.00050134
LOC105370772	1.33006	3.82461	1.7841	2.14373	0.0320548
KCNQ3	1.32709	3.82111	1.64013	2.32976	0.0198188
LINC01492	1.32496	3.81583	1.80186	2.11772	0.0341988
LOC105371658	2.13606	3.8019	1.45242	2.61762	0.00885444
RPL23AP1	174.008	3.79676	0.559562	6.78524	1.15894e-11
C9orf47	6.20146	3.79601	1.39292	2.72521	0.00642612
SLCO1A2	1.30463	3.79539	1.8208	2.08446	0.0371181
TREML4	751.142	3.78113	0.39882	9.48081	2.52323e-21
MZF1-AS1	1141.04	3.77758	0.417504	9.04801	1.45597e-19
TRAV13-1	2.11161	3.77405	1.82037	2.07323	0.0381512
LOC105371449	1.26696	3.75353	2.05544	1.82615	0.0678277
INPP4B	21.6291	3.75227	1.31959	2.84352	0.00446184
CCNA1	2.05302	3.75201	1.82937	2.05098	0.040269
TSBP1	1.26908	3.75179	2.35895	1.59045	0.111734
ZNF878	1.26743	3.7504	2.06158	1.81918	0.0688837
PABPC5	1.26006	3.747	2.35608	1.59036	0.111755
LINC02278	1.61334	3.74323	1.6237	2.30538	0.0211454
LOC101927377	1.2514	3.73943	1.81728	2.05771	0.0396177
MIR12117	1.23522	3.72211	1.25689	2.96137	0.00306278
VWA2	1.23772	3.71672	2.35787	1.57631	0.114955
LOC101928929	1.22638	3.70555	2.05819	1.80039	0.0717984
LINC00383	1.22362	3.70069	2.36072	1.56761	0.116971
RNY1P12	3.17842	3.70068	0.858166	4.31232	1.61552e-05
SYT9	1.9821	3.69648	1.31027	2.82115	0.00478514
COL21A1	1.20992	3.68975	1.81712	2.03054	0.0423012
LOC105378825	1.19639	3.68577	1.59878	2.30536	0.0211464
KIF18A	42.0604	3.68336	0.617877	5.96132	2.50208e-09
RNU6-1316P	2.45637	3.67108	0.877263	4.1847	2.85546e-05
LOC101927543	3.78602	3.6567	1.02607	3.5638	0.00036552
LOC107984509	8.17617	3.65618	0.603866	6.05462	1.4075e-09
LOC105376224	8.0167	3.65236	1.09645	3.33108	0.000865091
LOC105379234	1.17946	3.65159	1.83632	1.98853	0.0467526
LOC107986712	1.17324	3.64399	1.82366	1.99818	0.0456972
LOC105372209	1.16918	3.64398	1.8389	1.98161	0.0475234
LINC00320	1.16955	3.63981	1.81135	2.00945	0.0444897
LOC105379096	1.16985	3.63731	2.08067	1.74815	0.0804383
LOC107986577	1.49534	3.62993	1.34686	2.6951	0.00703681
LOC107984869	2.41376	3.62148	1.26454	2.86389	0.0041848
LOC105370659	1.13992	3.6094	2.06551	1.74746	0.0805577
LOC105370165	2.9544	3.60874	1.21445	2.9715	0.00296345
LOC441806	1.14079	3.60604	1.37696	2.61884	0.00882297
LOC105371115	1.14357	3.60092	2.40205	1.49911	0.133846
RPS4XP6	1.44623	3.58495	1.46124	2.45336	0.0141529
HSPE1P18	4.21373	3.56411	0.890221	4.00362	6.23792e-05
MIR4772	1.10495	3.55761	1.45379	2.44714	0.0143997
LOC105372405	1.10285	3.55612	1.63877	2.16999	0.0300075
LOC105369864	2.84913	3.55565	1.12537	3.15953	0.00158021
LOC105371965	2.28346	3.55202	1.29692	2.73881	0.00616626
LRRC4C	1.10558	3.55174	2.10733	1.68542	0.0919077
PLCXD3	1.80845	3.54176	1.63294	2.16896	0.0300861
LINC01793	1.09019	3.53493	2.41097	1.46618	0.142599
LOC105372174	1.08777	3.53455	2.41599	1.46298	0.143473
MYCBP2-AS1	1.3924	3.52916	1.44628	2.44016	0.0146807
LOC112268008	1.08374	3.52908	2.1003	1.68027	0.092904
DYNLRB2	155.009	3.52526	0.472893	7.45467	9.00914e-14
LOC105374772	1.07827	3.52234	2.40195	1.46645	0.142526
LOC101929294	25.1362	3.51822	0.824666	4.26624	1.98794e-05
DYTN	1.06845	3.5129	2.09029	1.68058	0.0928446
TRBV5-4	1.06726	3.51219	2.42027	1.45116	0.146737
LOC105369699	1.06897	3.50949	2.10353	1.66838	0.0952394
TCHHL1	1.06804	3.50418	2.10132	1.66761	0.0953941
LOC105376034	1.04747	3.48733	2.10746	1.65475	0.0979752
LOC105369657	1.04454	3.48364	1.82845	1.90525	0.0567482
LOC100507053	1.04488	3.47498	2.11375	1.64399	0.100178
LOC102724832	1.04183	3.47443	1.88417	1.84401	0.0651817
TRBV2	1.70667	3.47409	2.08122	1.66925	0.0950671
TRBV4-1	1.04056	3.4737	2.12343	1.63589	0.101862
LOC105377508	1.0454	3.47054	1.64337	2.11185	0.0346994
LOC105376364	1.70028	3.46798	1.46401	2.36882	0.0178448
LOC105370437	1.03853	3.46795	2.42294	1.43129	0.152346
MIR378J	1.03645	3.46724	1.62031	2.13987	0.0323655
GUCY1A2	1.7051	3.46016	1.6625	2.0813	0.0374066
LOC107984219	1.68548	3.45476	1.44148	2.39668	0.0165443
LOC100127919	1.02403	3.4521	1.62604	2.12301	0.0337527
LOC112267932	3.85855	3.43524	1.14557	2.99873	0.00271112
HAPLN1	1.01437	3.43445	2.44084	1.40708	0.159405
LOC101929309	6.54972	3.43339	1.11684	3.0742	0.00211066
LINC01030	1.01237	3.433	2.46677	1.3917	0.164014
NTS	1.00752	3.42351	2.81849	1.21466	0.224495
LOC107985134	2.07918	3.4129	1.29394	2.6376	0.00834945
LINC00471	44.6607	3.4101	0.67528	5.04991	4.42025e-07
LOC105376936	0.989813	3.40023	2.12562	1.59964	0.109678
LOC105376528	0.988464	3.39588	2.43955	1.39201	0.163919
HLF	0.982484	3.39161	2.132	1.59081	0.111652
GABRA4	1.63732	3.3861	2.09643	1.61517	0.106273
LOC105375710	0.98312	3.38444	2.44568	1.38385	0.166405
LOC112267858	0.98312	3.38444	2.44568	1.38385	0.166405
SSXP10	1.26865	3.37582	1.25678	2.68608	0.00722959
LOC105378719	16.4992	3.36534	0.44901	7.49501	6.62911e-14
PLAAT5	0.96626	3.36424	2.12851	1.58056	0.113978
CRNDE	0.969269	3.36416	2.84238	1.18357	0.236582
SYCE1	0.961297	3.36332	2.83592	1.18597	0.235634
SMARCA1	0.965285	3.36315	2.44707	1.37435	0.169332
LOC100128497	0.958009	3.36198	2.13068	1.57789	0.11459
YBX1P3	1.5905	3.36176	1.4789	2.27315	0.023017
CSRNP3	0.953403	3.34968	2.12517	1.57619	0.114982
DHX33-DT	0.954229	3.34422	2.47968	1.34865	0.177449
LOC105370315	1.23675	3.34096	1.67795	1.99109	0.0464706
LOC112268120	1.55215	3.33911	1.44998	2.30288	0.0212858
LOC105374821	0.948602	3.33505	2.4691	1.35071	0.176787
CNIH3-AS2	0.943043	3.3229	2.46554	1.34774	0.177742
LOC105375637	1.96801	3.32268	1.84529	1.80063	0.0717613
LOC105374610	1.54435	3.31183	1.85992	1.78063	0.0749734
LOC100422495	0.928691	3.31008	1.66822	1.9842	0.0472334
ZNF99	1.93053	3.30389	1.40352	2.354	0.0185728
LOC107985566	0.922959	3.2956	1.89616	1.73804	0.0822043
LINC02254	0.924206	3.29496	2.46798	1.33508	0.181849
RNU6-540P	2.38122	3.29136	0.926844	3.55115	0.000383556
CAPZBP1	0.911714	3.27931	2.18118	1.50346	0.132721
GSG1	30.9955	3.2789	0.698972	4.69103	2.71834e-06
EDDM3DP	0.907511	3.27521	2.48239	1.31938	0.187043
LOC105369666	119.138	3.26232	0.536203	6.08411	1.17138e-09
VCAM1	0.898656	3.26125	2.48231	1.31379	0.188915
DNAI4	65.411	3.25787	0.459102	7.09618	1.28251e-12
LOC100132004	0.898693	3.25266	2.50444	1.29876	0.194028
LOC105371120	0.89322	3.25197	2.16037	1.50528	0.132252
LOC107985868	0.893277	3.24841	2.48697	1.30617	0.191495
LOC105374264	129.007	3.24799	0.447483	7.25837	3.91796e-13
GABRG1	0.892845	3.24725	2.48567	1.30639	0.191421
OVCH2	0.892808	3.24611	2.89648	1.12071	0.262412
LOC105373772	0.886719	3.24239	2.19235	1.47896	0.139151
LOC101929452	2.31897	3.23988	1.35937	2.38336	0.0171554
LOC100420679	10.3714	3.23948	0.543981	5.95514	2.59849e-09
LOC105376799	1.84898	3.23735	1.88948	1.71336	0.0866468
LOC102724858	0.887182	3.23458	2.50913	1.28912	0.197355
GARNL3	0.883374	3.23414	2.88825	1.11976	0.262818
LOC105372173	0.88478	3.22996	2.89766	1.11468	0.264987
SLCO1B3-SLCO1B7	0.882142	3.22943	2.16131	1.4942	0.135123
LINC00548	0.883202	3.22746	2.89555	1.11462	0.265011
NGF-AS1	0.880045	3.22246	2.89527	1.11301	0.265705
LINC01135	2.27696	3.22016	1.22486	2.629	0.00856353
RGS4	0.876888	3.21749	2.89935	1.10973	0.267117
LOC105378374	1.84755	3.21556	1.8688	1.72066	0.0853129
RN7SL862P	1.43173	3.21444	1.22813	2.61734	0.00886175
LOC105375752	0.874518	3.2104	2.53127	1.26829	0.204693
ATXN8OS	1.44179	3.19955	1.85818	1.72187	0.0850932
LOC107984702	3.55224	3.19666	1.51869	2.10488	0.0353016
RNU4ATAC	26.9866	3.1942	0.497668	6.41833	1.37781e-10
LOC101928978	0.858327	3.19302	2.50456	1.27488	0.202352
LOC105374936	0.849874	3.18581	2.18221	1.4599	0.144318
LOC107984089	0.857048	3.18542	2.91968	1.09102	0.275265
LOC107984127	3.40963	3.18317	0.819905	3.88237	0.000103443
LOC105376982	1.11189	3.18175	1.72016	1.84968	0.0643602
MIR3975	1.78103	3.18035	0.956634	3.32452	0.000885696
EDIL3-DT	3.75329	3.17723	1.30147	2.44127	0.0146359
EGOT	1.4176	3.17647	1.48612	2.13742	0.0325638
RPL21P128	1.10433	3.17589	1.57846	2.01202	0.0442179
LOC105370353	0.847105	3.16592	2.51986	1.25639	0.208976
ZNF556	1.40222	3.16511	1.88698	1.67734	0.0934764
LOC107986813	1.39535	3.15883	2.40787	1.31188	0.189561
LOC105370783	2.70891	3.15495	1.54417	2.04314	0.0410388
SNORD12	56.1675	3.15407	0.367736	8.57701	9.73672e-18
LOC440040	0.837635	3.1535	2.9409	1.07229	0.28359
LOC51145	0.837405	3.15293	2.92712	1.07714	0.281416
PWAR5	1.37868	3.14413	1.67726	1.87456	0.0608527
BMP2KL	1.08225	3.14226	1.496	2.10044	0.0356898
LOC101926956	0.829195	3.14095	2.5174	1.2477	0.212142
LOC112268262	4.83442	3.14052	1.12164	2.79993	0.00511143
SLC5A7	1.08045	3.13439	1.89768	1.65169	0.0985968
MIR3140	2.60515	3.13205	1.01185	3.09538	0.00196561
VDAC1P11	3.24153	3.13158	0.978752	3.19956	0.00137636
NAALADL2-AS2	0.826497	3.12906	2.23735	1.39856	0.161946
COL11A1	2.20347	3.12883	1.54078	2.03068	0.0422873
LOC101928438	2.20166	3.12642	1.29347	2.41708	0.0156457
CLNK	2.55343	3.12312	1.56414	1.9967	0.0458577
LOC107984684	1.3597	3.12132	2.12167	1.47116	0.141247
FGF7	0.817408	3.11967	2.9374	1.06205	0.288212
MRPL50P2	2.16761	3.11922	0.983583	3.17128	0.00151769
LOC105372065	4.09686	3.11741	0.764506	4.07769	4.54862e-05
MEI4	0.814817	3.1111	2.94134	1.05772	0.290185
NF1P1	0.810923	3.11048	2.52521	1.23177	0.218034
LOC105373373	10.361	3.10671	1.073	2.89536	0.00378728
SAA2	0.81166	3.10577	2.9511	1.05241	0.292611
TRPC6P	0.808999	3.10513	2.94146	1.05564	0.291131
OR5M8	0.808846	3.09912	2.20351	1.40645	0.159592
LPP-AS1	6.3336	3.09742	0.702752	4.40756	1.04542e-05
LOC107986600	0.805826	3.09722	2.53192	1.22327	0.221228
LOC105370035	0.796415	3.09262	2.19	1.41216	0.157903
RPS10P9	1.34174	3.08727	1.56613	1.97128	0.048692
LOC105374726	0.794026	3.08581	2.95876	1.04294	0.296976
FAM83A-AS1	0.797139	3.08428	2.94904	1.04586	0.295626
LOC105379227	1.02999	3.07828	1.69684	1.81412	0.0696592
LOC105377202	1.03466	3.07781	1.92587	1.59814	0.110011
KLHL4	0.792926	3.07283	2.97267	1.03369	0.301279
RIMS1	0.791949	3.07071	2.21792	1.3845	0.166205
LOC105375265	0.78389	3.07042	2.24823	1.36571	0.172031
LOC107986207	0.786594	3.06838	2.20278	1.39296	0.163632
LOC105373554	2.69376	3.06223	1.16748	2.62293	0.0087176
LOC105371608	0.781035	3.0593	2.19651	1.3928	0.163681
LOC105374618	2.53978	3.05756	1.52334	2.00714	0.0447344
ZCCHC12	1.64076	3.05115	1.49757	2.03741	0.0416092
RPL27P8	1.00733	3.04928	1.69313	1.80097	0.0717078
MTOR-AS1	1.30491	3.04879	1.53945	1.98045	0.0476531
C12orf40	0.777955	3.04841	2.55385	1.19365	0.232614
CFH	2.60383	3.04348	1.68849	1.80248	0.0714693
LOC105376216	8.63322	3.04231	0.826026	3.68307	0.000230446
LOC101929534	1.28998	3.04032	1.8926	1.60642	0.108181
CD28	10.2778	3.03937	1.90615	1.5945	0.110823
LRRC53	0.773541	3.03812	2.20468	1.37803	0.168193
SI	0.767822	3.03566	2.58006	1.17658	0.239362
IQCG	104.422	3.03125	0.465145	6.51679	7.18293e-11
LOC107986648	0.769714	3.02999	1.93944	1.5623	0.118217
LOC107986999	1.61869	3.02901	0.994353	3.04621	0.00231744
LOC105372468	0.761641	3.02862	2.97367	1.01848	0.30845
LOC391674	0.760718	3.02429	2.59926	1.16352	0.244619
LOC101927293	3.63709	3.02136	1.00141	3.0171	0.00255207
LNCOG	0.761538	3.01775	2.22842	1.35421	0.175669
C7orf57	0.990405	3.01767	2.18762	1.37943	0.167762
SNORD97	0.992137	3.01674	1.37807	2.1891	0.0285893
LINC01122	0.759232	3.01628	2.97687	1.01324	0.310946
HMGB3P22	0.755037	3.01548	1.93192	1.56087	0.118554
FIGN	5.52985	3.01513	1.21947	2.47248	0.0134178
LOC105374737	1.27381	3.01497	1.71482	1.75819	0.0787155
HNRNPA1P36	0.760362	3.00997	1.55695	1.93324	0.0532062
DNMT3AP1	1.26842	3.00945	1.69349	1.77707	0.0755569
LOC107986364	107.008	3.00516	0.48693	6.17165	6.75795e-10
LOC112268203	47.7009	3.00422	0.93902	3.19931	0.00137758
LOC105370679	0.749445	3.0039	2.55358	1.17635	0.239457
CAMK4	15.2825	3.00096	1.3615	2.20415	0.0275136
LOC107986069	0.752095	2.99647	2.56142	1.16984	0.242064
SCARNA28	3.4698	2.99272	0.756237	3.95739	7.57732e-05
RNA18SN1	8768.23	2.99259	0.450169	6.64772	2.97675e-11
LOC107984685	0.979246	2.99076	2.51806	1.18773	0.234942
LOC105372766	11.5947	2.98964	0.8297	3.60327	0.000314238
MLLT10P1	0.977612	2.97903	1.94216	1.53387	0.125061
TATDN1P1	53.2805	2.97821	0.373784	7.96775	1.61595e-15
TMEM47	0.744731	2.97683	1.96071	1.51824	0.128954
H2AC21	100.008	2.97338	0.333228	8.92294	4.54057e-19
MIR652	1.24025	2.97279	1.39226	2.13523	0.0327426
LOC105369714	1.94976	2.97217	2.08199	1.42757	0.153417
LOC751602	0.734036	2.97011	2.21971	1.33806	0.180876
LOC105377112	0.731375	2.96441	2.5678	1.15446	0.248312
LYRM4-AS1	0.730743	2.96237	2.5713	1.15209	0.249284
TRNW	19.035	2.96193	0.509613	5.81212	6.1687e-09
SNORD143	16.1743	2.96113	0.448796	6.59794	4.169e-11
NANOGP2	0.730181	2.96058	1.96909	1.50353	0.132703
CYCSP4	0.723826	2.96001	1.96653	1.5052	0.132273
VGLL3	1.23658	2.95743	1.6788	1.76164	0.0781309
LOC105373828	1.22876	2.95559	2.15086	1.37414	0.169398
RN7SL128P	2.35922	2.95501	0.899668	3.28456	0.00102143
LOC101927389	0.720276	2.94953	2.57349	1.14612	0.251745
LOC105375149	1.91764	2.94629	1.51192	1.94871	0.0513306
CIBAR1P1	0.72389	2.94568	3.00375	0.980669	0.326756
LINC01344	0.720279	2.94426	3.00377	0.980186	0.326994
HECW2-AS1	9.78715	2.93956	1.00649	2.9206	0.00349363
ARL4AP4	1.52551	2.93841	1.51019	1.94572	0.0516881
SYDE2	1.89262	2.92777	1.86168	1.57265	0.1158
LOC101927429	1.90772	2.92575	1.67231	1.74953	0.0801998
LOC107987223	25.0959	2.92401	0.719192	4.06569	4.78899e-05
PLAU	1431.02	2.92286	0.766636	3.81258	0.000137525
LOC107985120	2.44839	2.92008	1.01824	2.86777	0.00413382
TRNK	66.8255	2.91983	0.488004	5.9832	2.18791e-09
LOC105377267	4.5848	2.91925	1.20639	2.41983	0.0155279
LOC107986636	0.713522	2.91845	2.59087	1.12644	0.25998
LOC105374192	0.712018	2.91822	3.00423	0.971369	0.331365
LINC02048	1.18817	2.91324	2.45457	1.18686	0.235282
SEMG2	0.706674	2.91145	2.59701	1.12108	0.262256
LOC105371664	0.701345	2.9108	3.00436	0.968859	0.332616
LOC112267952	0.706484	2.91025	2.24293	1.29752	0.194452
TMPOP1	0.701292	2.90226	3.00451	0.965966	0.334061
THOC7-AS1	1.5023	2.90049	1.67038	1.73643	0.0824883
FMN2	1.88105	2.89987	1.32032	2.19635	0.0280672
FAM204BP	3.73864	2.89451	0.831848	3.47961	0.000502136
LOC105374769	44.4852	2.89407	0.609625	4.7473	2.06147e-06
LOC107987083	0.697161	2.89367	3.00467	0.963059	0.335518
XIAPP2	0.697967	2.89363	2.24643	1.2881	0.197711
CLDN8	0.700275	2.89311	2.61878	1.10476	0.269265
ANO2	0.696684	2.88823	3.00477	0.961217	0.336443
LOC105375553	0.696988	2.88382	3.00485	0.959722	0.337195
LOC105373485	0.692037	2.87904	3.00493	0.958106	0.338009
UGT2B15	0.689372	2.8779	3.00495	0.957718	0.338205
H2AZP1	1.17449	2.87777	1.70466	1.68818	0.0913763
LOC112268095	0.689805	2.87234	2.62535	1.09408	0.27392
LINC02700	1.83851	2.86969	1.68372	1.70437	0.0883111
LOC107986306	0.684531	2.86805	2.26268	1.26755	0.20496
GLRB	0.689096	2.86805	3.00513	0.954383	0.33989
LOC107984606	0.684637	2.86791	2.61749	1.09567	0.273223
GLYCTK-AS1	0.68138	2.86695	3.00515	0.954012	0.340078
OR8J1	0.683841	2.86539	1.98228	1.4455	0.148318
TDGF1	1.16971	2.86237	1.91578	1.4941	0.135149
RAPGEF4	0.679019	2.86236	3.00524	0.952455	0.340866
LOC101927811	0.68594	2.8617	3.00525	0.952233	0.340979
LAMTOR3P1	0.681003	2.85959	2.00359	1.42723	0.153513
LINC02164	0.682132	2.85876	3.0053	0.951239	0.341483
MIR6780A	1.14767	2.85766	1.35361	2.11114	0.0347605
TSLP	0.682783	2.85532	3.00537	0.950074	0.342075
RNY4P8	0.900641	2.85322	1.16622	2.44655	0.014423
RPL36P9	33.4742	2.85183	0.754146	3.78153	0.000155867
MSMB	1.1517	2.85111	1.905	1.49665	0.134486
LOC105369793	1.80759	2.84834	1.50556	1.89188	0.0585067
LINC02464	1.13944	2.84391	2.15988	1.3167	0.18794
EEF1A1P8	0.672734	2.84259	1.75297	1.62159	0.104891
LOC107985364	3.05893	2.84166	1.3711	2.07254	0.0382154
LOC101929861	0.670443	2.8412	2.26552	1.25411	0.209803
MAPK6P5	1.12942	2.83747	1.32966	2.13398	0.0328448
RPL26P35	0.668793	2.83744	2.00288	1.41668	0.156576
RAD17P1	0.675156	2.83648	1.99751	1.42001	0.155605
MINAR2	1.12802	2.836	2.17092	1.30636	0.191431
RPL7P50	0.876479	2.83501	1.96001	1.44642	0.148058
FOSB	10853.7	2.83293	0.721768	3.92499	8.6734e-05
LINC01808	0.666451	2.82644	3.00591	0.940296	0.347066
LOC101928264	0.663721	2.81991	2.62872	1.07273	0.283391
LINC02831	0.665627	2.81932	3.00604	0.937884	0.348304
LOC105376636	0.663501	2.8159	2.26928	1.24088	0.214651
LOC101929996	0.660241	2.81318	3.00616	0.935807	0.349372
LOC105379461	0.655528	2.811	2.26109	1.24321	0.213791
TMEM132B	1.77259	2.80745	1.51525	1.8528	0.063911
LOC641746	0.655505	2.80203	2.63121	1.06492	0.286912
ERVFRD-1	3.06579	2.80181	0.989616	2.83121	0.00463719
CHCHD4P2	1.76988	2.80099	1.61484	1.73454	0.082823
LOC107985701	0.653689	2.79893	2.62933	1.0645	0.287101
LOC105374191	1.10242	2.79884	2.17756	1.28531	0.198683
RBM46	3.66432	2.79882	1.40262	1.99542	0.0459968
LINC01685	0.653242	2.79821	2.63293	1.06277	0.287885
IL23R	1.75462	2.79717	1.55028	1.8043	0.0711849
LOC101929617	1.76892	2.79709	1.74183	1.60583	0.108312
LOC112267963	1.12913	2.79482	1.76926	1.57965	0.114187
TRIM64B	0.866309	2.79375	1.96095	1.42469	0.154246
LOC107986285	0.650104	2.79266	3.00655	0.928857	0.352963
LOC107986113	4.75114	2.79026	0.654889	4.26067	2.03815e-05
DRD4	0.645696	2.78967	2.63925	1.057	0.290514
SLC9A2	2.81595	2.78962	1.52522	1.829	0.0674003
FEZF1	1.4085	2.78218	1.89595	1.46743	0.142258
RNA18SN2	7323.74	2.78192	0.43892	6.33809	2.32628e-10
UBE2CP1	1.38646	2.78019	1.12997	2.4604	0.0138781
LOC107987281	2.65179	2.77963	1.54675	1.79708	0.0723232
MARCHF11-AS1	0.647905	2.77946	2.6405	1.05263	0.292511
CCNG1P1	3.12647	2.77799	0.983703	2.82401	0.00474264
FAM172BP	0.639937	2.77701	2.64126	1.05139	0.293077
LOC105376373	1.75655	2.77173	1.89114	1.46564	0.142746
NDUFB4P2	0.641727	2.77083	2.00776	1.38006	0.167568
ATP5MC2P3	46.8842	2.76945	0.46705	5.92966	3.03563e-09
SCRT2	13.1385	2.76925	0.506149	5.47122	4.46954e-08
LINC01305	2.52272	2.76899	1.12431	2.46284	0.0137841
RALBP1P2	1.08282	2.76829	1.08371	2.55446	0.0106353
LOC105371239	45.6367	2.76771	0.407766	6.78748	1.14105e-11
LOC101929814	0.84507	2.76579	1.96961	1.40423	0.16025
ABCA9	1.7586	2.76337	1.72933	1.59794	0.110056
MDGA2	5.246	2.76263	1.07126	2.57887	0.00991247
LOC107984759	0.631621	2.76022	2.27706	1.21219	0.225441
FRG1GP	0.638898	2.76015	2.65413	1.03994	0.298366
LOC107986661	0.635297	2.7589	2.6423	1.04413	0.296426
LOC105376976	30.8521	2.75663	0.549813	5.01376	5.33761e-07
LINC00958	0.635741	2.75571	3.00727	0.91635	0.359483
LRRC37A6P	0.632841	2.75512	2.31185	1.19174	0.233363
CNR1	10.0443	2.75459	2.14607	1.28355	0.199298
MIR4782	0.634693	2.75409	1.61474	1.70559	0.0880842
LOC105374973	1.08837	2.75368	1.70048	1.61936	0.10537
LINC02172	0.632327	2.7526	2.28453	1.20489	0.228247
RGS5-AS1	0.636496	2.75138	3.00736	0.914882	0.360253
LOC107984891	0.636496	2.75138	3.00736	0.914882	0.360253
LOC105376998	1.07269	2.75114	2.19544	1.25312	0.210162
LOC105373928	0.630751	2.75068	3.00737	0.914646	0.360377
RPL26P10	0.629402	2.74676	2.01932	1.36024	0.173755
RPL36AP1	0.82701	2.74393	1.74738	1.57031	0.116343
LOC105373134	0.626845	2.74225	2.66015	1.03086	0.302605
LRRTM3	0.63176	2.74106	3.00756	0.91139	0.36209
MIR4753	0.625503	2.73885	1.99481	1.37299	0.169755
HNRNPA1P57	0.630182	2.73761	3.00763	0.910222	0.362705
HMGN2P35	0.616479	2.7365	1.75786	1.55672	0.119537
LOC105372747	0.626721	2.7343	2.65996	1.02795	0.303974
LOC107985130	7.27014	2.73418	0.613607	4.45592	8.35323e-06
C5orf46	0.628604	2.73416	3.0077	0.909051	0.363323
LOC101928912	0.628604	2.73416	3.0077	0.909051	0.363323
PGBD4P6	0.621203	2.7305	2.04415	1.33576	0.181628
ESRRB	0.62469	2.72991	2.66149	1.02571	0.30503
LOC102725191	0.621063	2.72934	2.66448	1.02434	0.305673
LOC105376368	0.625447	2.72722	3.00784	0.906702	0.364564
LOC105371688	0.618531	2.72453	3.0079	0.905793	0.365045
SCARNA9L	16.7591	2.7225	0.519416	5.24146	1.5931e-07
ANKRD33	0.62006	2.72106	3.00797	0.904617	0.365668
KCNQ1-AS1	7.89071	2.71958	0.535982	5.07401	3.89511e-07
LINC02537	0.619016	2.71908	3.00801	0.903947	0.366023
LOC105370688	1.05239	2.71896	1.71072	1.58937	0.111977
LOC646976	40.7363	2.71829	0.421983	6.4417	1.18145e-10
LOC339593	0.620712	2.71675	3.00805	0.90316	0.366441
TPTE2P6	3.25176	2.71389	2.49046	1.08971	0.275839
LINC00461	1.04273	2.7092	1.71377	1.58084	0.113914
SEPTIN7P6	21.0482	2.70895	0.518458	5.22502	1.74132e-07
HMGN2P31	0.809948	2.70858	2.25327	1.20207	0.229337
LOC107985019	3.67749	2.70822	1.07151	2.52747	0.0114886
LOC105373455	1.04343	2.70775	1.92515	1.40652	0.159571
LOC105375730	1.32178	2.7053	2.17923	1.2414	0.214457
LOC101927189	1.33936	2.70522	1.89839	1.42501	0.154153
LOC105370117	12.1448	2.70482	0.537379	5.03334	4.81997e-07
LOC105379070	5.61639	2.70422	2.71817	0.994865	0.319802
LOC107986347	8.47315	2.70362	0.746589	3.6213	0.000293122
RPL30P4	0.824818	2.70209	1.23996	2.17918	0.0293187
FMO2	0.608464	2.70067	3.00838	0.897714	0.369338
LOC105371948	5.3706	2.69836	0.673674	4.00544	6.19031e-05
LOC105372797	2.91434	2.69822	1.1115	2.42754	0.0152018
RPS14P9	0.606135	2.69795	2.32248	1.16167	0.245371
LOC105369670	0.606321	2.69762	2.67609	1.00804	0.313433
LOC107985155	7.75286	2.69569	0.798413	3.3763	0.000734667
LOC107986483	0.603623	2.69131	2.67412	1.00643	0.31421
LOC100996249	0.60334	2.68917	2.67819	1.0041	0.315331
LOC105372311	1.05878	2.68886	1.70437	1.57763	0.114652
RN7SL49P	1.04283	2.68702	1.30996	2.05123	0.0402449
LOC107986025	0.60719	2.68574	3.00869	0.892661	0.372039
ELMOD1	1.01934	2.68402	2.19456	1.22303	0.221318
RNA18SN3	6842.56	2.68326	0.431163	6.22331	4.86785e-10
LOC107986032	9.14256	2.68287	0.574058	4.67352	2.96084e-06
LOC105373703	0.601007	2.67731	2.6739	1.00127	0.316694
GTF2IP12	183.102	2.67608	0.312841	8.55414	1.18753e-17
LOC105369622	3.98409	2.67227	1.25333	2.13213	0.032996
MIPEPP1	0.595445	2.67211	3.00898	0.888047	0.374515
LOC105374937	15.9627	2.66994	0.655809	4.07121	4.67701e-05
MAPK6P2	0.597036	2.66868	2.67717	0.996829	0.318848
GPR15	1.31989	2.66807	1.61758	1.64942	0.0990611
MIR7845	6.87749	2.66801	0.607065	4.39493	1.10807e-05
PLCXD2-AS1	1.01867	2.66588	1.91467	1.39234	0.16382
LOC105373696	0.596128	2.66587	2.67983	0.994789	0.319839
LOC100128673	1.30438	2.66496	1.93712	1.37573	0.168904
LOC107984647	1.62659	2.66408	1.43658	1.85446	0.0636741
TRK-TTT3-1	1.30219	2.66306	1.0248	2.59862	0.00936001
CCDC15-DT	0.590974	2.66273	2.68852	0.990406	0.321976
LINC02669	0.58989	2.66	2.68938	0.989075	0.322626
LOC105369435	1.30006	2.65893	1.9228	1.38284	0.166713
LOC107985160	1.01917	2.65804	1.40124	1.89692	0.0578391
LOC105372135	1.02095	2.65595	1.94212	1.36755	0.171452
FREM1	1.63422	2.65463	1.92295	1.3805	0.167433
LINC01580	0.785773	2.6503	2.61465	1.01364	0.310757
CKS1BP4	27.0836	2.65014	0.515076	5.14514	2.67321e-07
TRAV38-1	1.01485	2.65007	2.19363	1.20808	0.227018
LOC100419073	13.2427	2.64842	0.410901	6.4454	1.15296e-10
LINC01802	0.995317	2.64544	1.70836	1.54852	0.121497
LOC105377356	0.781372	2.64537	2.00355	1.32034	0.186721
ADAM3A	0.587013	2.64501	2.69138	0.982772	0.32572
LOC105379025	0.774347	2.64494	1.99913	1.32305	0.18582
FRG1DP	2.97065	2.64414	1.36887	1.93162	0.053406
CKS1BP5	1.01667	2.64414	1.71629	1.54061	0.123411
LINC02754	1.0208	2.64159	2.21049	1.19503	0.232076
LINC00940	1.58698	2.64064	1.90812	1.3839	0.16639
LOC105369795	0.583976	2.63916	2.69737	0.978419	0.327867
ZFX-AS1	7.93536	2.63587	0.78211	3.37021	0.000751113
RNF17	1.58331	2.63561	2.13277	1.23577	0.216545
NUDT12	0.581725	2.63377	2.71343	0.970644	0.331725
EPN2-AS1	1.25579	2.63359	1.91526	1.37505	0.169114
LINC01751	0.578396	2.63199	2.69353	0.977151	0.328494
LINC01242	0.989764	2.62955	2.19369	1.19869	0.23065
RNU6-890P	28.7353	2.62834	0.387988	6.77428	1.2503e-11
RPL12P11	0.579296	2.627	2.32584	1.12948	0.258694
LOC105369438	4.23952	2.62594	0.929273	2.8258	0.0047162
LOC102724775	0.578453	2.62428	2.6985	0.972493	0.330805
LOC105377790	0.581454	2.62365	2.7102	0.968065	0.333012
LOC105377276	1.26147	2.62313	1.91319	1.37107	0.170352
OR13A1	1.25704	2.62145	2.16183	1.2126	0.225281
SSTR4	0.985905	2.619	1.70176	1.539	0.123805
LOC105378976	1.85085	2.61812	1.55989	1.6784	0.093269
IL7R	82.4029	2.61765	1.03315	2.53367	0.0112876
SRP72P2	2.35706	2.61381	1.40465	1.86083	0.0627689
LOC105374275	0.573584	2.61348	2.69879	0.968391	0.332849
MPHOSPH6P1	37.1739	2.61309	0.339012	7.70796	1.27842e-14
LOC105375368	0.569911	2.61296	2.7023	0.966939	0.333574
MLXP1	0.569761	2.61289	2.72001	0.960617	0.336745
MIR7161	1.24739	2.61283	1.36322	1.91665	0.0552818
GDI2P1	0.57367	2.6072	3.01037	0.866074	0.38645
LOC105370827	1.23999	2.60497	2.17433	1.19806	0.230895
LOC102724458	1.55155	2.60271	2.41647	1.07707	0.281448
OR6N1	52.0744	2.60203	0.273818	9.50277	2.0438e-21
LOC644303	4.00851	2.6019	0.817689	3.18202	0.0014625
C2CD6	2.50946	2.59947	1.69597	1.53274	0.125341
OR5F1	0.572846	2.59791	3.01057	0.862929	0.388177
LOC105377959	0.572846	2.59791	3.01057	0.862929	0.388177
ALPK2	0.56694	2.59744	2.33313	1.11329	0.265585
HLA-F-AS1	152.544	2.59525	0.496407	5.22806	1.71296e-07
LOC285762	1.52999	2.5942	1.88464	1.37649	0.168669
LOC105370264	0.564611	2.59352	2.70691	0.958112	0.338006
KLHL31	0.56746	2.59179	3.01071	0.860858	0.389317
LOC105369416	0.56746	2.59179	3.01071	0.860858	0.389317
RPL21P48	0.752173	2.59149	2.62174	0.988464	0.322925
SLC9C2	1.25499	2.59053	2.16499	1.19656	0.231479
SDR16C5	0.569689	2.59032	3.01074	0.860362	0.38959
ICOS	4.05057	2.58881	2.20295	1.17516	0.239932
ERBB4	3.0177	2.58876	1.67611	1.54451	0.122465
LOC105376652	0.56224	2.58733	2.71298	0.953684	0.340243
LOC105374042	0.568111	2.58651	3.01082	0.859072	0.390301
LOC100288001	0.566532	2.58269	3.01091	0.857779	0.391014
LOC107986109	0.5633	2.58091	2.7189	0.949249	0.342494
LOC105374024	0.96233	2.58011	2.5262	1.02134	0.307093
ASPDH	1.5455	2.57993	1.89818	1.35916	0.174094
SUSD4	0.967527	2.57928	2.54256	1.01444	0.310372
RPS26P38	0.55805	2.57889	1.85412	1.39089	0.164257
ARHGAP42-AS1	0.564954	2.57887	3.01099	0.856484	0.39173
TRNH	23.2868	2.57811	0.45829	5.6255	1.84976e-08
RFPL2	1.20742	2.57735	1.53057	1.68392	0.0921977
LINC02367	1.24684	2.57655	2.16792	1.18849	0.234641
LOC105371881	1.21251	2.57644	1.94073	1.32757	0.184322
TRAJ37	0.556848	2.57517	2.36722	1.08785	0.276663
OR8D2	0.563376	2.57503	3.01108	0.855185	0.392449
LOC442263	77.0693	2.57424	0.839306	3.0671	0.00216144
EML6-AS1	1.21555	2.57228	1.70824	1.5058	0.132118
CLCA4	0.557989	2.56893	3.01122	0.853121	0.393592
LOC107985258	0.74033	2.56755	2.29412	1.11919	0.26306
LOC105369672	0.557874	2.56711	2.7237	0.942508	0.345933
EEF1GP7	0.552452	2.56399	2.7179	0.94337	0.345492
AKR1D1P1	0.965467	2.56392	2.21125	1.15949	0.246258
HOXB5	0.558641	2.56346	3.01134	0.851271	0.394619
LOC105372106	0.558641	2.56346	3.01134	0.851271	0.394619
LOC105375875	0.558641	2.56346	3.01134	0.851271	0.394619
SETP15	0.944657	2.56296	1.93426	1.32503	0.185161
LOC107987073	0.741602	2.56208	2.02247	1.26681	0.205224
LOC105376689	0.963635	2.56169	1.74099	1.4714	0.141183
LOC102724584	3.2559	2.55867	0.99358	2.5752	0.0100181
CTD-2154B17.1	0.554203	2.55651	2.35314	1.08643	0.277291
H4C3	720.008	2.55116	0.286741	8.89709	5.73281e-19
MIR4308	2.71982	2.55042	1.08635	2.34769	0.0188901
UBA52P5	1.20557	2.54986	1.19138	2.14025	0.0323345
TSPO2	0.550521	2.54952	2.72843	0.934425	0.350085
TRE-CTC1-6	0.545425	2.54866	2.0522	1.24191	0.214268
LOC641381	1.83801	2.54819	1.02937	2.47548	0.0133059
GPR12	1.76862	2.547	2.11972	1.20158	0.229528
LOC101929278	1.52757	2.54603	1.89452	1.34389	0.178983
LHX9	2.23186	2.54467	1.30539	1.94936	0.0512526
TRAV8-1	0.729815	2.53964	2.64421	0.960454	0.336827
LOC107986018	0.935045	2.53863	2.53933	0.999723	0.317445
LOC100271907	0.942224	2.53807	1.95004	1.30155	0.193071
KCNT2	2.90082	2.53668	1.53215	1.65564	0.0977956
B3GALT1	0.938162	2.53576	1.94728	1.3022	0.192847
LOC107986363	402.855	2.53549	0.397899	6.37219	1.86351e-10
LOC105369833	1.18416	2.53485	2.17423	1.16586	0.243671
ZNF101P2	1.50355	2.53369	1.17375	2.15863	0.0308792
C6orf52	3.41803	2.53215	1.51441	1.67204	0.0945161
LOC646140	0.950198	2.53143	2.23778	1.13123	0.25796
LOC102723883	0.539691	2.53081	2.74507	0.921946	0.356557
LOC105373372	2.23151	2.53035	1.70968	1.48001	0.13887
FAM184A	0.717773	2.52951	2.2806	1.10915	0.267367
LINC00309	1341.74	2.52853	0.665709	3.79825	0.000145722
MIR597	0.542284	2.52733	2.35638	1.07255	0.283475
LINC01620	1.17227	2.52609	1.95953	1.28913	0.197353
ME3-DT	6.39935	2.52217	2.74059	0.920302	0.357415
LOC105375964	0.535549	2.5219	2.73169	0.9232	0.355903
LOC107985530	2.93465	2.52171	0.895848	2.81489	0.00487947
THEMIS	16.1385	2.51872	1.18308	2.12895	0.0332583
LOC100130270	1.82457	2.51759	1.40032	1.79787	0.0721979
ACTR3BP3	0.724343	2.51755	2.28897	1.09986	0.271392
KCND2	0.533972	2.51656	2.7426	0.917581	0.358838
MCF2L2	120.76	2.51614	0.391166	6.4324	1.25601e-10
LOC107986193	5.13042	2.51531	0.902868	2.78591	0.00533772
LOC105377703	0.537458	2.51521	2.36407	1.06393	0.287361
LOC107984284	0.536767	2.51454	2.73742	0.918578	0.358316
LOC107987024	1.83063	2.51423	1.08413	2.31912	0.0203886
PTGFR	1.94526	2.51411	1.75247	1.43461	0.151399
LOC341056	0.531776	2.51267	2.37563	1.05769	0.290199
HNRNPA1P6	0.924523	2.51147	2.2477	1.11735	0.263845
TRBV18	0.533878	2.50977	3.01257	0.833097	0.40479
PABPC1P8	0.710922	2.50766	2.31849	1.08159	0.279434
LOC102723381	0.53694	2.50662	2.74823	0.912084	0.361724
NXT1P1	0.951669	2.50567	1.33484	1.87713	0.0605004
LOC101928436	0.532942	2.50557	3.01267	0.831677	0.405591
HLA-DQB1-AS1	10.092	2.50406	1.84288	1.35878	0.174218
CCR9	0.935746	2.50325	2.22188	1.12664	0.259896
MIR19A	0.909521	2.49991	1.5364	1.62712	0.103711
ANGPTL8	0.526919	2.49965	2.76404	0.904347	0.365811
LOC105369706	18.0504	2.49943	0.613402	4.07471	4.60721e-05
MIR144	0.525532	2.49887	2.3561	1.0606	0.288873
LOC107986346	0.907775	2.49854	1.21558	2.05543	0.0398373
LOC105370975	0.528448	2.4956	3.01291	0.828303	0.407499
SNORA23	7.01958	2.49548	0.616134	4.05023	5.11672e-05
LOC105371986	0.528801	2.49538	2.74521	0.908994	0.363354
SH3PXD2B	0.701722	2.49454	2.66043	0.937648	0.348425
SNORD96B	1.47009	2.49372	1.02976	2.42166	0.0154498
LOC105374148	0.527818	2.49154	2.75022	0.905941	0.364967
SRP14P1	0.910502	2.49052	1.1891	2.09446	0.0362189
LINC01102	0.526628	2.48954	3.01305	0.826252	0.408661
CD163	24.3936	2.48914	0.838178	2.9697	0.00298091
LOC101927723	4623.1	2.48809	0.419885	5.92565	3.11065e-09
PPP1R1A	0.529625	2.48778	2.76137	0.900923	0.367629
LOC105373613	0.521796	2.48643	2.74741	0.905009	0.36546
TANK-AS1	1.45133	2.48562	1.7649	1.40836	0.159025
TRAV26-1	0.524397	2.48519	3.01315	0.824781	0.409496
FXYD6-FXYD2	0.524397	2.48519	3.01315	0.824781	0.409496
TRBV27	0.524143	2.4838	2.76345	0.898806	0.368756
LOC105369842	0.527279	2.48338	3.0132	0.824166	0.409845
LOC105374815	0.919324	2.48251	2.21116	1.12272	0.261558
MIR548BC	0.89817	2.48243	1.54957	1.60201	0.109154
SPATA12	5.62633	2.48207	0.748975	3.31396	0.000919846
LOC105377017	0.522458	2.4788	2.75155	0.900873	0.367656
RN7SL45P	3.50341	2.47727	0.776423	3.19061	0.00141971
GAPDHP68	2.02366	2.47707	1.30938	1.89179	0.0585189
DAZ4	0.526984	2.47628	2.39547	1.03374	0.30126
VSTM2A	2.15223	2.4761	1.53549	1.61258	0.106835
LINC02102	0.525116	2.4758	2.75586	0.898379	0.368984
SALL2	0.52097	2.47511	2.37575	1.04182	0.297494
MYT1	0.517725	2.47452	3.01341	0.82117	0.411549
LOC107986788	20.4967	2.47429	0.886667	2.79056	0.00526174
RPS10P14	0.520627	2.47376	2.09461	1.18101	0.237598
LINC01180	0.906703	2.47287	2.22965	1.10909	0.267393
ANP32D	0.520739	2.4727	1.86483	1.32597	0.184851
ADTRP	33.7623	2.47152	0.593722	4.16276	3.14426e-05
LOC107985976	0.701645	2.47004	2.01374	1.22659	0.219976
ARMC12	16.4788	2.4687	0.759573	3.25011	0.00115361
LOC107987206	187.257	2.46828	0.392097	6.29509	3.07223e-10
TOX3	1.43463	2.46691	1.95233	1.26358	0.206383
FGL1	0.685051	2.46513	2.66462	0.925132	0.354897
LOC101929418	55.2129	2.46423	0.452787	5.44235	5.2582e-08
LOC105374777	2.08949	2.46276	1.38844	1.77376	0.0761022
EPS15P1	0.519157	2.46208	3.01371	0.816961	0.413951
LOC105373734	0.519028	2.46187	3.01371	0.81689	0.413991
SPAG5-AS1	243.057	2.45908	0.360599	6.81945	9.13922e-12
IGIP	6.5737	2.45901	0.646529	3.80341	0.000142718
CDH18	1.86781	2.45671	1.71916	1.42902	0.153
PCDHGA11	0.517912	2.45658	2.76712	0.887776	0.374661
LOC105379437	0.517912	2.45658	2.76712	0.887776	0.374661
LOC105379074	1.12219	2.45553	1.71871	1.4287	0.15309
SCN7A	0.888933	2.45384	2.5584	0.959129	0.337494
KCNIP4	0.516334	2.45248	2.76455	0.887118	0.375015
HMGB1P25	0.516334	2.45248	2.76455	0.887118	0.375015
NDUFA5P2	0.51563	2.4509	2.77552	0.883043	0.377213
LOC107985484	8.89571	2.44922	1.06875	2.29167	0.0219249
LOC105371659	0.514755	2.44844	2.77021	0.883844	0.37678
PKP1	0.510947	2.44833	3.01404	0.812308	0.416615
LINC01559	0.510947	2.44833	3.01404	0.812308	0.416615
LOC107986268	0.513716	2.44744	3.01407	0.812005	0.416789
LOC101927822	15.5588	2.44704	0.742395	3.29614	0.000980222
LOC105377873	0.513384	2.44573	3.01411	0.811427	0.417121
OR8K1	1.14603	2.44494	1.83277	1.33401	0.1822
LINC00612	0.508106	2.44235	2.76667	0.882777	0.377357
LOC105376228	3.92348	2.44123	0.942839	2.58924	0.00961889
LOC105372055	1.86885	2.43955	1.54126	1.58283	0.113459
RPL39P26	4.28242	2.43873	0.752868	3.23925	0.00119845
LOC105372328	0.879288	2.43784	2.23047	1.09297	0.274407
NCAM2	6.04566	2.43745	1.17257	2.07872	0.0376427
RS1	1.14265	2.43733	2.48369	0.981331	0.326429
KLHL32	1.1124	2.43413	1.53463	1.58613	0.112709
LOC105377113	1.95625	2.43249	1.55304	1.56627	0.117285
MIR7150	0.667033	2.43244	1.77429	1.37094	0.170395
RPL21P74	2.0493	2.43184	1.31513	1.84912	0.0644405
LOC105377401	1.10991	2.43183	1.92808	1.26127	0.207211
LOC102724530	0.877928	2.43167	1.97217	1.23299	0.217579
NSA2P5	1.45595	2.43148	1.58056	1.53837	0.123959
RPS13P5	2.83338	2.43003	0.875868	2.77442	0.00552997
LOC105377973	2.83965	2.42944	1.16874	2.07868	0.0376465
RPL23AP11	0.872213	2.42906	1.76821	1.37374	0.169522
SRD5A3P1	0.883213	2.42839	2.55688	0.949748	0.34224
LINC00412	0.502474	2.42797	2.38503	1.018	0.308676
ALB	0.50005	2.42704	3.01457	0.805103	0.42076
LOC107984888	0.506182	2.42661	2.7794	0.873068	0.382626
LOC100129728	1.40846	2.42637	1.58994	1.52608	0.126989
WDR86-AS1	0.502274	2.42635	3.01458	0.804871	0.420894
RPL21P69	1.43025	2.4263	1.12106	2.1643	0.0304411
CSNK1G2-AS1	39.9398	2.42623	0.550969	4.40357	1.06486e-05
IPPKP1	0.509196	2.42618	3.01459	0.804811	0.420928
LOC107986236	0.509196	2.42618	3.01459	0.804811	0.420928
GAPDHP35	0.87959	2.42488	1.11189	2.18085	0.0291942
MSH4	2.35226	2.42291	1.4138	1.71376	0.0865727
LOC105377272	326.228	2.42291	0.481805	5.02882	4.93506e-07
BEST1	102195	2.42276	0.597978	4.05159	5.087e-05
LOC100128428	0.507392	2.4227	2.0949	1.15648	0.247487
PSMC1P10	0.895745	2.42119	1.66261	1.45626	0.145321
LOC105375851	0.50381	2.42031	3.01473	0.802827	0.422074
LOC105369689	0.497488	2.42002	3.01474	0.80273	0.422131
MIR4757	0.503569	2.41961	2.78222	0.869669	0.384481
MFSD13B	0.499068	2.41809	2.80936	0.860726	0.389389
RPL12P21	0.873349	2.41574	1.41616	1.70583	0.0880391
LOC105379169	0.50205	2.41542	2.78385	0.867656	0.385582
ACSBG2	2.44134	2.41453	1.36626	1.76726	0.0771855
LOC112268132	0.504461	2.41342	3.01491	0.800496	0.423423
LOC105374435	0.672047	2.4134	2.67439	0.902412	0.366838
ENAM	1.10338	2.41301	1.5708	1.53617	0.124497
MAB21L2	0.497351	2.4129	3.01492	0.800318	0.423526
LOC101927366	2.0213	2.41121	1.26273	1.90952	0.0561945
NETO1	2.26136	2.41113	1.30056	1.85391	0.0637524
MIR5047	1461.34	2.41104	0.276432	8.72199	2.73363e-18
AGGF1P3	0.502883	2.40915	3.01501	0.799051	0.424261
LINC02099	0.502883	2.40915	3.01501	0.799051	0.424261
LOC105374510	0.502883	2.40915	3.01501	0.799051	0.424261
ERVW-1	0.495218	2.4087	2.41464	0.997539	0.318503
TRNR	29.5039	2.40788	0.40231	5.98514	2.16197e-09
CAVIN2-AS1	1.09557	2.40714	1.94498	1.23761	0.215859
LOC105378751	0.874451	2.40594	2.23101	1.07841	0.280851
DEUP1	0.498533	2.40591	2.78368	0.86429	0.387428
CELF2-AS1	253.669	2.40434	0.232619	10.3359	4.84736e-25
MRPS6P2	1.67875	2.40428	1.28684	1.86835	0.0617126
RRAGAP1	0.665279	2.40343	1.82951	1.3137	0.188947
ADAMTS19	1.11673	2.40163	2.50224	0.959793	0.337159
CHN1	5.59474	2.40108	0.803837	2.98703	0.00281704
C6orf118	1.38543	2.4003	2.19434	1.09386	0.274017
TRNS2	16.1614	2.40021	0.4534	5.2938	1.19802e-07
C9orf163	1.69273	2.39966	0.97844	2.45254	0.0141853
LOC105370291	0.85448	2.39965	2.24908	1.06695	0.285994
LOC105373324	0.495918	2.39906	3.01527	0.795636	0.426243
LOC105375754	0.495918	2.39906	3.01527	0.795636	0.426243
LOC107985262	13.2624	2.39863	0.443382	5.40985	6.30793e-08
LOC112268104	4.4186	2.39781	0.865534	2.77033	0.00559998
LOC646666	0.491009	2.39715	2.39841	0.999472	0.317566
LOC105376313	1.09192	2.3971	2.51551	0.952927	0.340627
MTRNR2L5	0.66498	2.39589	1.80923	1.32426	0.185417
EIF4E2P1	0.495496	2.39526	2.41459	0.991994	0.3212
LOC105379442	1.10662	2.39469	1.35158	1.77177	0.0764325
CBLN2	0.496569	2.39194	3.01545	0.79323	0.427644
SAR1AP1	0.496569	2.39194	3.01545	0.79323	0.427644
ESRG	0.496569	2.39194	3.01545	0.79323	0.427644
LOC105370163	0.496569	2.39194	3.01545	0.79323	0.427644
LOC105374265	0.496569	2.39194	3.01545	0.79323	0.427644
CFL2	54.4165	2.39187	0.645984	3.70268	0.000213333
LOC643562	0.86541	2.39182	1.95949	1.22063	0.222225
SNORD45A	0.652026	2.39148	1.3644	1.75277	0.0796416
LOC112267902	0.48867	2.38889	3.01553	0.792197	0.428246
TRAV8-2	1.70566	2.38888	1.93584	1.23403	0.217192
LOC101928371	17.7935	2.38535	0.571361	4.17485	2.98181e-05
LOC100421569	39.297	2.38343	0.470335	5.06752	4.03041e-07
CACNA2D1-AS1	2.1778	2.38258	1.71636	1.38816	0.16509
LOC105371241	0.843197	2.38129	1.96598	1.21125	0.225801
SNORD84	5.75151	2.38073	0.485736	4.90129	9.521e-07
MIR4706	0.484116	2.37907	2.39956	0.991459	0.321461
LINC02297	1.37807	2.37891	1.37057	1.73572	0.082614
PABPC1P9	0.653881	2.37881	2.34523	1.01432	0.31043
LINC01695	1.71884	2.37867	1.70299	1.39676	0.162487
RGS1	1008.51	2.37857	0.868839	2.73765	0.00618805
LOC107984336	3.5551	2.37635	0.852081	2.78888	0.00528899
FLRT3	0.487023	2.37388	2.7965	0.848875	0.395951
LOC107984380	0.486551	2.37267	3.01594	0.786711	0.431451
TBC1D8B	10.2131	2.3715	0.756434	3.13511	0.00171791
CBX1P2	35.5248	2.37074	0.405283	5.84959	4.92793e-09
ASB17	0.489665	2.37037	2.80811	0.844114	0.398606
LOC105379109	0.484973	2.36767	2.82029	0.839514	0.401181
RPL35AP5	9.81772	2.36747	0.551192	4.29518	1.74553e-05
CDH10	0.8546	2.3654	2.23539	1.05816	0.289983
TRND	77.9742	2.36485	0.435424	5.43113	5.59977e-08
LOC105379183	1.39167	2.3638	1.56865	1.5069	0.131836
PPIAP79	0.652594	2.36323	2.07072	1.14126	0.253761
CACNA2D1	4.87051	2.35864	1.46195	1.61335	0.106669
PRH1-TAS2R14	6.28768	2.35755	0.934551	2.52265	0.0116474
LOC105377428	0.47793	2.35669	3.01635	0.781304	0.434624
LOC107984315	287.624	2.35638	0.230766	10.2111	1.76876e-24
ALDOB	2.02331	2.35593	1.28195	1.83778	0.0660953
PTCD2P1	0.476532	2.3556	2.81548	0.836661	0.402783
LINC02539	0.479763	2.35526	3.01639	0.780822	0.434907
LOC105374490	0.480237	2.35519	3.01639	0.780798	0.434921
KCNA2	1.05426	2.35261	2.20599	1.06647	0.286213
MIR4259	23.7149	2.35194	0.515032	4.56659	4.95713e-06
LOC105378437	0.478551	2.35035	2.81037	0.836313	0.402979
LOC107985429	1.85918	2.35001	1.38704	1.69426	0.0902156
INHBA-AS1	0.845002	2.34696	1.9765	1.18743	0.235058
HSPD1P5	1.06551	2.3466	1.98117	1.18445	0.236234
ST13P10	3.01889	2.34565	0.833834	2.81308	0.00490687
LOC101926960	0.827282	2.34539	2.58291	0.908042	0.363856
RPL12P38	0.828334	2.34493	1.74945	1.34038	0.180123
LOC107985981	1.32258	2.34422	1.91842	1.22195	0.221726
GPR149	0.479899	2.34324	2.8154	0.832295	0.405242
LOC105379168	0.479203	2.34314	3.01671	0.776721	0.437324
LOC105374147	0.475147	2.34029	2.81406	0.83164	0.405612
SLC25A51P1	0.847478	2.3399	1.40277	1.66806	0.0953034
SNORD62B	0.852821	2.33945	1.24079	1.88546	0.059368
LOC105371744	0.854665	2.33898	2.58168	0.905991	0.364941
LOC102723914	22.3908	2.33695	0.489491	4.77425	1.80374e-06
LOC102723406	1.94275	2.33657	1.31923	1.77117	0.0765332
GNG10P1	0.468858	2.3325	3.01699	0.773122	0.43945
TAMALIN-AS1	0.471396	2.3301	2.11472	1.10185	0.270526
LOC105370067	0.469764	2.32543	2.82064	0.824431	0.409694
MIR548H1	1.346	2.3252	1.17016	1.98708	0.0469141
LOC728024	16.5033	2.32505	0.487063	4.7736	1.80959e-06
PAFAH1B2P2	0.469292	2.32361	3.01722	0.770114	0.441233
PCBP2P3	0.469292	2.32361	3.01722	0.770114	0.441233
RN7SL168P	0.468935	2.32342	2.13014	1.09073	0.27539
LOC107986859	0.4686	2.32317	2.44146	0.951549	0.341326
C8orf34	6.88592	2.32306	0.940022	2.47128	0.0134631
MIR3945	162.093	2.32294	0.39079	5.94421	2.77786e-09
TRAV6	0.813538	2.32128	2.26889	1.02309	0.306265
LOC101928856	0.471063	2.31943	3.01734	0.7687	0.442071
LOC100130854	0.467714	2.31895	2.84795	0.814253	0.4155
LOC105372669	0.464127	2.31852	3.01736	0.768394	0.442253
USP12-AS1	0.466927	2.3185	3.01736	0.768388	0.442257
LOC105374200	0.463905	2.31809	3.01737	0.768248	0.44234
LOC101927647	15.926	2.31707	0.424484	5.45855	4.80041e-08
LOC102723512	10.7896	2.31678	0.663988	3.48919	0.000484483
RPL17P36	0.629334	2.31591	1.38898	1.66735	0.0954458
LOC105372759	1.33503	2.31484	1.93047	1.19911	0.230486
LOC100288628	1.04566	2.31439	1.76498	1.31128	0.189762
TMA16P2	2.69042	2.31382	1.27286	1.81782	0.0690918
ANKRD66	1.93402	2.31317	1.44809	1.5974	0.110177
LOC148696	59.1626	2.31296	0.318018	7.27304	3.51495e-13
LOC677762	9.71199	2.31211	0.455468	5.07634	3.84783e-07
SNORD36C	3.48046	2.3113	0.669907	3.45017	0.000560224
LUARIS	0.46469	2.31027	2.8228	0.818433	0.41311
RPL21P33	1.30501	2.31012	1.41271	1.63524	0.101999
LOC101928819	0.464557	2.31012	3.01758	0.765553	0.443942
ALOX15	9.78859	2.30916	0.85088	2.71386	0.00665052
RPL37P7	0.463501	2.30872	2.84429	0.811702	0.416962
LOC105373547	0.463853	2.30823	2.83391	0.814504	0.415356
LOC729941	56.8919	2.30705	0.297592	7.7524	9.01736e-15
TRBV5-6	0.837367	2.30652	2.26145	1.01993	0.307761
LOC105378807	6.23559	2.3058	0.746114	3.09041	0.00199882
LOC100419170	67.8384	2.30503	0.444987	5.18001	2.21879e-07
DNMBP-AS1	7.84461	2.30481	0.668779	3.4463	0.000568316
TRAV1-2	0.817683	2.30471	2.00903	1.14718	0.251309
PTCSC1	234.886	2.30443	0.363811	6.33414	2.38674e-10
MTHFD2P7	1.29545	2.30141	1.58543	1.4516	0.146612
LOC105370266	2.75876	2.30061	1.46029	1.57545	0.115153
LOC102724723	0.46104	2.30016	2.43069	0.946298	0.343997
LOC101927516	31.6668	2.3001	0.393581	5.84404	5.0949e-09
LOC101928592	0.460307	2.29998	2.43167	0.945846	0.344227
LOC101928217	1.32622	2.29698	1.92859	1.19101	0.233649
LOC401312	0.456221	2.29534	3.01798	0.760554	0.446924
LINC00645	0.461836	2.29284	3.01805	0.759709	0.447429
IER3-AS1	125.753	2.29183	0.563756	4.06529	4.79735e-05
LOC100328982	1.02326	2.29175	1.09848	2.0863	0.0369513
MIR320D1	0.614334	2.29006	1.83717	1.24651	0.212576
PPIGP1	4.81577	2.28945	1.31851	1.7364	0.0824934
SULT1A3	69.5851	2.28855	0.466875	4.90185	9.49407e-07
LOC107985012	0.460072	2.28781	3.01819	0.758009	0.448446
LOC105369690	2.5065	2.28685	1.27883	1.78823	0.0737391
LOC101929473	0.458309	2.28191	3.01835	0.756013	0.449641
LINC00856	28.0753	2.28163	0.48623	4.69249	2.69898e-06
LINC02575	0.823403	2.2806	2.26678	1.0061	0.314369
SNORD14A	10.8675	2.27921	0.471572	4.83321	1.34346e-06
PCDH20	0.453829	2.279	2.84665	0.80059	0.423369
SEMA6A-AS2	0.457419	2.27841	3.01845	0.75483	0.450351
LOC105377836	1.86514	2.27732	1.0379	2.19416	0.028224
SNORA6	1.28501	2.27658	1.11793	2.03642	0.0417081
CCDC190	1.27656	2.27613	2.18906	1.03978	0.298444
RPL31P27	3.29483	2.27599	0.710156	3.20492	0.001351
LOC105374062	0.452501	2.27564	3.01852	0.753892	0.450914
NOG	0.606992	2.27497	1.67634	1.3571	0.174749
SLC26A4-AS1	3.22046	2.27355	1.52461	1.49124	0.135899
LOC105370804	0.793116	2.27323	2.26994	1.00145	0.31661
LINC02476	0.452033	2.27303	3.01859	0.75301	0.451444
IL17REL	3.09503	2.27127	1.12901	2.01174	0.0442471
TVP23BP2	0.804396	2.26979	1.82919	1.24087	0.214654
HPCAL4	1.27181	2.26803	2.18617	1.03744	0.299529
LOC105374406	6.4747	2.26796	1.33719	1.69606	0.0898743
SNORD14B	6.55486	2.26648	0.529785	4.2781	1.88492e-05
LOC100421517	0.797424	2.26583	1.98106	1.14375	0.252728
LOC105376017	0.448876	2.26378	3.01885	0.749882	0.453326
STUM	1.01916	2.26129	1.72254	1.31277	0.189262
RPL5P11	2.26148	2.26056	1.20142	1.88157	0.0598944
LOC102724551	1.5722	2.2604	1.43031	1.58035	0.114027
LOC107984444	0.447155	2.25998	2.85551	0.791445	0.428684
LOC107986882	1.26093	2.2594	1.94167	1.16364	0.244571
MIPOL1	5.62089	2.25881	1.23826	1.82418	0.0681249
PRH2	0.99566	2.25692	1.73411	1.30148	0.193093
LOC101927039	0.777924	2.25645	1.74839	1.29059	0.196847
DPPA2P4	0.445827	2.25561	2.84694	0.792294	0.428189
LOC105372125	0.449527	2.25509	3.01909	0.746944	0.455098
LOC100130990	0.62144	2.25423	2.06368	1.09234	0.274685
THSD7B	0.785765	2.25241	2.27365	0.99066	0.321851
CFHR4	0.605241	2.25126	2.72861	0.82506	0.409338
GJA6P	2.46435	2.25088	0.970513	2.31927	0.0203806
TMEM14EP	14.8257	2.2505	0.470101	4.78727	1.69069e-06
ZNF84-DT	0.44782	2.24995	2.85505	0.788062	0.430661
LOC105371231	0.443884	2.24992	3.01923	0.745196	0.456153
SAG	6.789	2.24978	0.641643	3.50629	0.000454408
RPL37P23	0.595711	2.24976	1.8225	1.23444	0.21704
LOC102723763	0.447834	2.24895	2.85885	0.786662	0.43148
EIF2S2P5	1.26923	2.24852	1.26003	1.7845	0.0743433
SPAG17	2.06385	2.2485	1.25705	1.78871	0.0736611
LINC01148	0.781543	2.24682	2.61813	0.858175	0.390796
LOC107984224	2.07271	2.24649	1.18443	1.89669	0.0578687
LOC391771	0.442267	2.24443	2.8996	0.774048	0.438903
LOC107985063	197.531	2.24365	0.277318	8.0905	5.9419e-16
HAUS1P2	1.01904	2.24298	2.21417	1.01301	0.311055
RPL22P10	0.786708	2.2401	1.9781	1.13245	0.257445
LOC112268267	5546.59	2.23976	0.315748	7.0935	1.30764e-12
LOC105374114	0.443698	2.23901	3.01954	0.741508	0.458386
DAZ1	0.781247	2.23886	2.01509	1.11105	0.266549
LOC105375635	0.444111	2.2387	2.85966	0.782857	0.433711
DLSTP1	1.9181	2.23765	1.01711	2.2	0.0278066
LOC107985979	1.24505	2.23758	2.18385	1.0246	0.305551
ATP1B1	2.26919	2.23743	1.73139	1.29227	0.196262
RPL39P6	0.59955	2.23732	2.40556	0.93006	0.35234
LINC00472	1.2451	2.23654	2.18774	1.0223	0.306637
ETV4	0.789068	2.23649	2.26429	0.987721	0.323289
TEX15	3.09406	2.23631	1.54796	1.44468	0.148547
PNKY	0.982305	2.23624	1.7698	1.26355	0.206392
LOC107984706	0.779545	2.23549	2.62097	0.852925	0.393701
PPM1E	4.61987	2.23442	0.833558	2.68058	0.00734946
LOC105376192	1.24019	2.23401	1.96738	1.13552	0.256156
RPL15P14	2.8511	2.23329	0.878334	2.54264	0.0110017
LOC105377795	0.776213	2.23236	2.61883	0.852426	0.393977
LOC107984669	175.536	2.23154	0.51417	4.34009	1.42424e-05
LOC105375990	0.777388	2.23131	2.00342	1.11375	0.265386
OR6T1	0.445547	2.23123	3.01976	0.738878	0.459981
SAR1AP3	0.445547	2.23123	3.01976	0.738878	0.459981
LINC02426	0.445547	2.23123	3.01976	0.738878	0.459981
LOC105370752	0.445547	2.23123	3.01976	0.738878	0.459981
LOC105377055	0.445547	2.23123	3.01976	0.738878	0.459981
SPEM3	0.445547	2.23123	3.01976	0.738878	0.459981
RPL37P2	1.54863	2.23058	0.927861	2.40401	0.0162165
SNORA19	2.14308	2.23017	0.832743	2.6781	0.00740417
EDDM3A	3.07743	2.22861	1.1846	1.88131	0.0599296
TPBG	1.00718	2.22737	1.73457	1.28411	0.199104
LOC100131496	1.23766	2.22662	1.51995	1.46493	0.14294
RPE65	0.592765	2.22633	2.36328	0.942051	0.346166
LOC105373007	0.44016	2.22602	3.01991	0.737116	0.461052
RGS2-AS1	502.685	2.2257	0.413554	5.38187	7.37167e-08
LOC105371141	10.6	2.2233	0.547795	4.05864	4.936e-05
LOC105379222	0.435246	2.22305	3.01999	0.73611	0.461664
MIR644A	10.1657	2.22212	0.405146	5.48473	4.14099e-08
LOC112268297	1.92826	2.22211	1.01423	2.19092	0.0284573
GCSAML-AS1	0.43485	2.22204	3.02002	0.735769	0.461871
LOC105378469	0.44239	2.2216	3.02003	0.735621	0.461961
TRNP	24.6759	2.22091	0.421997	5.26287	1.41826e-07
LOC105375689	0.434774	2.22087	3.02006	0.735375	0.462111
LOC105374780	2.49866	2.22035	1.52036	1.46041	0.144178
ST13P9	0.983487	2.2203	1.99892	1.11075	0.266675
LOC100533853	0.77627	2.21999	2.3119	0.960241	0.336934
SULT1C2	0.785288	2.21876	2.27231	0.976433	0.32885
TRNT	25.5167	2.21857	0.395271	5.61277	1.9911e-08
CASQ2	0.990398	2.2183	1.95739	1.1333	0.25709
LOC105375842	0.440812	2.21676	3.02017	0.733986	0.462957
TREML5P	11.0829	2.21659	0.510991	4.33782	1.43902e-05
LOC107985391	0.437004	2.21579	2.87314	0.771208	0.440583
LOC107986185	2.00198	2.21442	1.53067	1.44669	0.147983
LOC105377166	0.432373	2.21429	3.02024	0.733151	0.463466
LOC101929498	0.436833	2.21264	2.46441	0.897839	0.369272
MIR4298	4.38526	2.21244	0.687557	3.21782	0.00129168
LINC00928	0.439233	2.21191	3.02031	0.732346	0.463957
LAMA1	0.439233	2.21191	3.02031	0.732346	0.463957
LINC01596	0.439233	2.21191	3.02031	0.732346	0.463957
LINC01337	3.01602	2.21172	1.06255	2.08152	0.0373863
TXNDC8	0.75856	2.21061	2.62868	0.840958	0.400371
RPS15AP24	2.4383	2.21027	1.18431	1.86629	0.0620007
OR10D3	0.434622	2.20946	2.87265	0.769139	0.441811
LOC105374927	6.93129	2.20937	0.783179	2.82103	0.004787
TRAV3	0.775079	2.20914	2.60541	0.847907	0.39649
LOC643067	0.434722	2.20908	2.87241	0.76907	0.441852
RPS15AP12	1.23603	2.20786	1.32494	1.66639	0.0956367
LOC105370816	18.1247	2.20777	0.78327	2.81866	0.00482243
LOC105374323	0.437655	2.20705	3.02045	0.730701	0.464962
TBX5	0.433847	2.20679	3.02046	0.730615	0.465014
CFHR5	0.433847	2.20679	3.02046	0.730615	0.465014
UBE2U	0.433847	2.20679	3.02046	0.730615	0.465014
NLRP14	0.433847	2.20679	3.02046	0.730615	0.465014
LOC105378576	0.433847	2.20679	3.02046	0.730615	0.465014
LOC105378979	1.22729	2.20658	1.9515	1.13071	0.258176
SCARNA9	271.601	2.20587	0.258138	8.5453	1.28199e-17
LOC107986931	0.432803	2.20423	3.02053	0.729748	0.465544
LOC105378404	0.971078	2.20296	2.2236	0.990718	0.321823
TRGV2	0.969231	2.20135	2.02355	1.08787	0.276654
LOC100420536	1.24689	2.20115	1.60661	1.37006	0.170668
MIR3173	2.86858	2.20014	0.89213	2.46617	0.0136568
PPIAL4G	0.763911	2.20005	1.62796	1.35141	0.176563
LOC105373707	0.431196	2.19913	3.02068	0.728025	0.466598
PURG	0.427421	2.1987	3.02069	0.727878	0.466688
LOC105377885	195.796	2.19853	1.75399	1.25344	0.210044
SNORA12	34.0919	2.1977	0.277711	7.91364	2.49964e-15
PCDHA11	0.434498	2.19728	3.02073	0.727398	0.466982
LOC400867	0.434498	2.19728	3.02073	0.727398	0.466982
TBCAP2	0.434498	2.19728	3.02073	0.727398	0.466982
LINC02871	0.434498	2.19728	3.02073	0.727398	0.466982
LINC00507	0.434498	2.19728	3.02073	0.727398	0.466982
LOC102723395	0.434498	2.19728	3.02073	0.727398	0.466982
LOC105369905	0.434498	2.19728	3.02073	0.727398	0.466982
TAS2R39	3.87651	2.19593	0.869984	2.5241	0.0115994
GRIP2	35.8006	2.19541	0.557398	3.93868	8.19309e-05
MIR5009	1.57889	2.19534	1.02334	2.14526	0.0319322
LOC100129358	7.68303	2.19497	1.27548	1.7209	0.0852685
LOC105370524	4.7662	2.19335	1.39794	1.56899	0.11665
TMC1	1.20888	2.19211	2.23598	0.980381	0.326898
LOC105376182	1.23499	2.19174	1.74894	1.25319	0.210138
BTF3P16	47.678	2.19096	0.374636	5.84825	4.9676e-09
LOC105375989	9.37947	2.19025	0.6202	3.53153	0.000413171
LINC02275	0.428724	2.1899	2.88475	0.759128	0.447776
SLC6A5	0.963118	2.18892	1.96218	1.11556	0.264612
LINC01811	0.753338	2.18767	2.28733	0.956431	0.338855
TRBV10-2	0.427102	2.18743	3.02102	0.724071	0.469022
TRBV6-4	0.427102	2.18743	3.02102	0.724071	0.469022
TRAV24	0.427102	2.18743	3.02102	0.724071	0.469022
TRAV10	0.427102	2.18743	3.02102	0.724071	0.469022
TRNL2	17.7525	2.18717	0.437994	4.99361	5.92597e-07
LOC107986178	1.20965	2.18694	2.20437	0.992091	0.321153
MYO16	18.9673	2.18675	0.66858	3.27073	0.00107269
SCARNA5	9.54065	2.18657	0.421468	5.188	2.12567e-07
LOC105376435	0.431215	2.18636	3.02105	0.723709	0.469245
LOC107986356	1.51578	2.18603	0.922614	2.36938	0.0178177
LOC643168	0.426948	2.18518	2.88345	0.757834	0.44855
LINC02842	0.575912	2.1838	2.08675	1.04651	0.295326
MCOLN3	2.12798	2.18322	1.37645	1.58613	0.11271
LOC105378489	0.426127	2.1831	2.88867	0.755747	0.449801
ZDHHC20P4	0.974696	2.183	1.76635	1.23588	0.216503
LOC105377882	0.422468	2.18295	3.02115	0.722554	0.469954
MIR326	1.21573	2.1828	1.34176	1.62681	0.103777
HNRNPA1P66	0.425554	2.18205	3.02118	0.722251	0.47014
MIR20B	0.425596	2.18087	2.88539	0.755831	0.449751
LOC105374498	0.421174	2.17958	2.88759	0.75481	0.450363
LOC100131877	9.15014	2.17804	0.638708	3.41007	0.000649459
LOC107984408	0.420442	2.17646	3.02134	0.720361	0.471303
LOC105373017	16.433	2.17629	0.403143	5.39831	6.72724e-08
GPR37	2.20532	2.17485	1.88664	1.15276	0.249008
LINC01147	1.21483	2.17456	1.60708	1.35312	0.176018
ST13P22	4.19733	2.17446	0.682423	3.18637	0.00144069
TRAJ33	0.423032	2.17444	3.0214	0.719678	0.471723
TM4SF1	0.948508	2.17299	2.22536	0.976466	0.328834
LOC105378848	0.423119	2.17291	2.88896	0.752143	0.451965
LOC112268426	932.376	2.17217	0.373056	5.82265	5.79215e-09
LOC105373643	0.422901	2.17191	3.02148	0.718824	0.472249
LOC100419975	1.2013	2.17096	1.61145	1.34721	0.177912
RPL36AP25	0.741604	2.17037	2.64832	0.819528	0.412485
LIPF	0.421695	2.1697	2.91245	0.744974	0.456287
LOC105373133	740.524	2.16892	0.487878	4.44562	8.76375e-06
FANCD2P2	0.748164	2.16867	2.27787	0.952062	0.341066
MGAT4D	0.417515	2.16704	3.02162	0.717179	0.473263
OSBPL9P6	0.417515	2.16704	3.02162	0.717179	0.473263
LOC101927817	94.1892	2.16674	0.388373	5.579	2.41904e-08
LOC100422434	0.752976	2.16546	1.99274	1.08667	0.277181
LINC01903	1.41741	2.16437	1.72318	1.25603	0.209103
BRDT	0.956002	2.16415	1.95705	1.10583	0.268802
LOC107986348	27.4844	2.16059	0.642628	3.36212	0.000773478
NEIL3	19.6699	2.15898	0.378412	5.70538	1.16085e-08
COLEC12	8.44812	2.15892	0.651287	3.31485	0.000916937
RFX6	0.414953	2.15871	3.02187	0.714362	0.475004
LOC105374666	0.418166	2.15704	3.02192	0.7138	0.475351
LOC107987178	0.418166	2.15704	3.02192	0.7138	0.475351
LOC105375782	6.59535	2.15646	0.755128	2.85576	0.00429343
MIR4511	0.563542	2.15441	1.66669	1.29263	0.19614
LOC100508046	0.573676	2.15265	2.74784	0.783398	0.433393
LOC105377402	5.5723	2.15161	0.825217	2.60733	0.00912511
RNY3P2	0.741568	2.15144	1.38503	1.55335	0.120339
LOC100131635	1.47069	2.14905	1.23067	1.74624	0.0807687
MIR3136	1.17497	2.14895	1.55158	1.38501	0.16605
H3C12	0.759819	2.14888	1.98329	1.0835	0.278589
LOC105370481	0.418818	2.14681	3.02222	0.710341	0.477493
LOC105377700	0.727441	2.1468	2.63606	0.814399	0.415416
LOC107984204	0.414461	2.14678	3.02222	0.71033	0.4775
DAZ2	0.567271	2.14663	2.09726	1.02354	0.306053
LOC107984671	7.27686	2.14586	0.942664	2.27638	0.0228233
PRC1-AS1	0.413928	2.14498	3.02228	0.709721	0.477877
SNORA50A	0.944929	2.14469	1.25646	1.70693	0.087836
LOC107986019	1.21071	2.14425	1.1425	1.8768	0.0605452
KCTD9P1	10.7976	2.14421	0.44304	4.83977	1.29992e-06
LOC107985027	20.6793	2.14388	0.465565	4.60491	4.12654e-06
LOC105373692	0.748937	2.14371	1.99853	1.07264	0.283432
TMEM67	12.0762	2.1435	0.523983	4.09078	4.29921e-05
LOC105375387	0.417828	2.14294	2.90697	0.737173	0.461017
LOC105373494	0.417131	2.14178	3.02237	0.708643	0.478546
OR52I1	0.412909	2.14123	2.17955	0.982418	0.325894
ZBTB20-AS1	4.62482	2.13989	0.993187	2.15457	0.0311956
LOC107987164	0.958141	2.13985	1.58254	1.35216	0.176326
LINC02402	0.569028	2.13948	2.75477	0.776646	0.437368
LOC105376387	0.416241	2.1381	3.02249	0.707396	0.47932
TLK1P1	0.411798	2.13809	3.02249	0.707396	0.479321
LOC105372114	3.29083	2.13771	1.07308	1.99213	0.0463573
KCNB2	0.950108	2.13723	2.23185	0.957605	0.338262
LOC105372003	0.415982	2.13723	3.02251	0.707105	0.479501
LOC105372945	9.3759	2.13717	0.689928	3.09768	0.00195044
GYS2	0.411557	2.13586	2.92747	0.729591	0.46564
SNORD3B-2	11.6181	2.13585	0.589163	3.62522	0.000288712
KITLG	0.931883	2.13538	2.25566	0.946679	0.343802
LOC107984526	4.43134	2.13479	1.13247	1.88508	0.0594189
RNU6-181P	0.558518	2.13471	1.65126	1.29278	0.196088
CFAP221	0.558686	2.1342	3.01389	0.708123	0.478869
TRAV27	0.414762	2.13381	3.02262	0.705947	0.480221
CXADRP2	4.75825	2.13307	0.941115	2.26653	0.0234188
RPS10P16	3.18607	2.13302	0.8268	2.57985	0.00988421
LOC107985947	4024.08	2.13177	0.424247	5.02483	5.03884e-07
GPR52	2.34078	2.13058	0.994335	2.14272	0.0321358
CFAP47	0.957701	2.13057	1.79181	1.18906	0.234417
ECRP	0.939875	2.13047	1.97131	1.08074	0.279813
LOC101929512	6.52429	2.13044	0.616051	3.45822	0.000543759
TPI1P4	0.560301	2.12989	1.66368	1.28023	0.200464
TMPRSS11B	1.94375	2.12859	1.72469	1.23419	0.217132
TAB3-AS1	2.22646	2.12839	0.89505	2.37795	0.0174091
LOC105373821	1.37008	2.12827	2.17808	0.977134	0.328503
UBE2Q1-AS1	0.950401	2.12545	2.25638	0.941977	0.346205
FKSG29	5.08929	2.12534	0.648232	3.27867	0.00104296
LOC105375045	3.48773	2.12462	0.957125	2.21979	0.026433
LOC105378027	0.551728	2.12461	2.09666	1.01333	0.310903
LOC105374945	13.9807	2.12386	0.585758	3.62582	0.000288045
SLC25A39P1	12.6821	2.123	0.503121	4.21966	2.4467e-05
PABPC1P12	0.921851	2.12273	2.25071	0.94314	0.345609
MIR643	0.406943	2.12272	2.49599	0.850452	0.395074
FABP12	0.92566	2.12262	2.24122	0.947084	0.343596
LOC107987055	0.917107	2.12245	1.96598	1.07959	0.280325
TRBV7-2	1.16826	2.12238	2.22449	0.954095	0.340035
LOC101927923	197.104	2.1216	0.396691	5.34823	8.88168e-08
LOC105374054	0.406475	2.12054	3.02302	0.701465	0.483013
GRAP	0.40611	2.11902	3.02307	0.700951	0.483333
H2AC7	323.697	2.11789	0.373757	5.66649	1.45751e-08
LOC105374399	0.734938	2.11788	2.62888	0.805623	0.42046
OR4K1	0.926472	2.11713	1.81514	1.16637	0.243465
NOVA1	2.97936	2.11676	1.43253	1.47764	0.139505
LINC01868	0.914887	2.11658	2.57256	0.822753	0.410648
LOC101929563	2.85264	2.11601	1.73182	1.22184	0.221768
LOC112267875	0.405642	2.11599	3.02316	0.699927	0.483973
CR2	2.14766	2.11567	1.53515	1.37815	0.168157
SERPINB11	0.405358	2.11429	3.02321	0.699352	0.484332
LOC107985987	0.404502	2.11417	2.92124	0.723722	0.469236
LOC643339	3.7579	2.11356	1.13847	1.8565	0.0633828
TCP1P2	0.408448	2.11333	3.02324	0.699029	0.484534
LOC107985427	0.40809	2.11164	3.02329	0.698459	0.48489
LOC107986925	10.6856	2.11147	1.0279	2.05416	0.0399606
LOC105373023	4.95873	2.11137	0.789393	2.67468	0.00748004
LOC107986427	6.13061	2.11132	0.567724	3.71891	0.000200082
BCO1	0.407764	2.10959	2.9374	0.718184	0.472644
MAS1	2.54054	2.10952	1.73202	1.21796	0.22324
LOC105375260	7.69174	2.10945	0.613326	3.43936	0.000583094
SIT1	2.36844	2.1093	1.56299	1.34953	0.177166
LOC105374217	1.60729	2.10827	1.5624	1.34938	0.177216
OR2B2	3.56453	2.10808	1.03604	2.03474	0.0418766
NACAP10	0.402486	2.10576	3.02347	0.696472	0.486133
LOC105375953	0.402486	2.10576	3.02347	0.696472	0.486133
LOC107986355	0.915975	2.10566	1.10847	1.89961	0.0574845
ZIK1P1	0.401819	2.10509	3.02349	0.696246	0.486275
MIR20A	0.910929	2.1049	1.74698	1.20488	0.228251
TRBV23-1	0.910133	2.10478	2.57034	0.818871	0.41286
HFM1	1.80727	2.10438	1.53468	1.37122	0.170306
LOC100129707	16.1936	2.10429	0.388141	5.42147	5.91117e-08
LOC105373712	0.710393	2.10426	2.6521	0.793432	0.427526
LOC112268291	0.406294	2.10425	2.92314	0.719859	0.471612
LOC105369456	4.38684	2.10422	1.25386	1.67819	0.0933093
KRT222	3.46127	2.10375	1.27462	1.65049	0.0988425
H2BC21	35773.7	2.10346	0.306192	6.86975	6.43125e-12
LOC107984247	34.0832	2.10346	0.465102	4.52259	6.10889e-06
RNU7-19P	0.713769	2.10314	1.28588	1.63557	0.101931
LOC105373740	4.24001	2.10307	0.99525	2.11311	0.0345917
LOC728715	0.405187	2.10239	3.02358	0.695331	0.486848
EPB41L4B	0.903989	2.1023	2.56993	0.81804	0.413334
SNORA14A	4.94418	2.10194	0.592466	3.54778	0.000388492
BRD7P5	1.14408	2.10102	1.98779	1.05696	0.290529
LOC107986458	0.40461	2.10076	3.02363	0.69478	0.487193
LOC105371501	0.724424	2.10047	2.2957	0.914957	0.360214
LOC105373449	2.66118	2.10017	1.38702	1.51416	0.129985
VLDLR	49.2038	2.09921	0.600521	3.49565	0.00047291
LOC112268264	0.39953	2.09914	2.51721	0.833915	0.404329
DPP10	1.16978	2.09815	1.80141	1.16472	0.244131
THAP12P4	0.399545	2.09744	2.92504	0.717065	0.473334
LOC100287357	0.924177	2.09671	2.2651	0.925659	0.354623
LPAR3	1.16166	2.09434	1.99256	1.05108	0.293223
CRISP2	1.58486	2.09277	1.91429	1.09324	0.274288
PMP2	1.72469	2.09188	1.43356	1.45922	0.144504
KCNMB3P1	0.402749	2.09187	2.92979	0.714	0.475227
LINC02637	2.6836	2.09162	1.33171	1.57063	0.11627
LOC100462988	1.35186	2.09115	1.94266	1.07644	0.28173
LOC107984798	54.6491	2.09092	0.460736	4.53822	5.67319e-06
RNU5A-1	5.71863	2.0892	0.619681	3.37141	0.000747852
ACBD7	6.39582	2.08899	0.823703	2.5361	0.0112095
RAB17	0.927218	2.08896	2.56191	0.815391	0.414848
LOC105372115	0.401199	2.08815	3.02402	0.690523	0.489866
LOC112268429	0.401199	2.08815	3.02402	0.690523	0.489866
DUXAP8	0.400545	2.08589	2.94586	0.708075	0.478899
LOC105376065	0.7129	2.08565	1.82493	1.14286	0.253096
TRBV7-3	0.914739	2.08534	1.79499	1.16175	0.245336
RPS16P5	222.719	2.08519	0.251901	8.27783	1.25441e-16
LOC102724253	0.70893	2.08519	2.30246	0.905637	0.365128
LOC574080	0.908089	2.08466	1.64343	1.26848	0.204626
LOC101929492	0.399765	2.08439	3.02414	0.689252	0.490665
LOC100506321	35.9267	2.0843	0.243614	8.55577	1.17087e-17
KLF4	671.534	2.0843	0.609122	3.42181	0.000622064
LOC105370588	1.59268	2.08266	1.73927	1.19743	0.231139
RPL34P20	163.847	2.08245	0.550508	3.78278	0.000155084
LOC105374724	8.43123	2.08122	1.08984	1.90966	0.0561767
LOC105373760	0.394654	2.08103	2.93691	0.708577	0.478587
SNORD13P1	0.700306	2.08067	1.36949	1.51931	0.128685
LOC102724048	0.394543	2.08049	3.02426	0.687934	0.491494
CLC	577.693	2.08022	0.432773	4.80673	1.53417e-06
TRNF	13.9504	2.08022	0.613936	3.38833	0.000703208
NELL2	2.57238	2.08013	1.72404	1.20654	0.227608
RPL7P13	0.394434	2.08011	3.02427	0.687805	0.491575
LOC105378032	0.920801	2.07973	1.96221	1.05989	0.289195
ZNF816-ZNF321P	4.9631	2.07966	1.31457	1.582	0.113649
FAS-AS1	271.304	2.07836	0.448355	4.63553	3.56031e-06
LOC101927627	101.574	2.07801	0.455236	4.5647	5.00207e-06
OR4K3	0.398014	2.07695	3.02437	0.686738	0.492248
PRSS3	0.736088	2.07557	3.00805	0.690003	0.490192
LINC00254	0.70393	2.07557	3.00805	0.690003	0.490192
TRPA1	4.28319	2.07512	1.191	1.74234	0.0814487
LOC107984602	49.0469	2.0746	0.406762	5.10028	3.39153e-07
IL1RL1	3.31049	2.07418	1.19984	1.72871	0.0838615
LOC284950	1.49258	2.07396	2.18499	0.949187	0.342525
CLDN11	30.3191	2.07319	0.286202	7.24381	4.36266e-13
ANGPTL1	56.1646	2.07311	0.310606	6.6744	2.48238e-11
LINC02774	14.9386	2.07186	0.625153	3.31416	0.000919195
PCDH10	0.396238	2.07181	3.02453	0.685001	0.493343
SNORD3A	37.8044	2.07155	0.505213	4.10034	4.12548e-05
RNA28SN1	42957.1	2.07141	0.305977	6.76981	1.2895e-11
CTAGE10P	0.395131	2.06834	2.94225	0.702978	0.482069
MIR222	0.390352	2.06832	2.52786	0.818209	0.413238
LOC107987069	0.390936	2.06814	3.02465	0.68376	0.494126
SLC16A14	2.82179	2.06769	1.08567	1.90454	0.0568402
LOC107987308	0.913718	2.06702	1.64283	1.25821	0.208317
CBY2	0.390309	2.06585	3.02472	0.682989	0.494614
API5P1	0.389097	2.06384	2.51619	0.820225	0.412088
LOC107986707	998.346	2.06384	0.377146	5.47225	4.44352e-08
LOC100505938	1.3724	2.06332	1.57223	1.31235	0.189404
IL21	0.39377	2.06236	3.02483	0.68181	0.495359
LOC112268279	0.39377	2.06236	3.02483	0.68181	0.495359
LOC100913082	4.64779	2.05778	0.660463	3.11566	0.00183532
SDR42E1P5	0.387403	2.05625	2.94887	0.6973	0.485615
SNORD36B	1.70877	2.05542	0.867064	2.37055	0.0177614
LYPD6	0.391081	2.05495	3.02507	0.679308	0.496943
SOX9-AS1	0.889881	2.05425	2.25511	0.910931	0.362332
CH17-125A10.2	0.536012	2.05142	2.10758	0.973353	0.330378
SNORD146	0.53152	2.05117	1.69737	1.20844	0.226878
LOC105375864	0.385983	2.05095	3.0252	0.677957	0.497799
NDUFB4P6	1.11797	2.05021	1.76377	1.1624	0.245074
LOC107985686	0.385761	2.05015	3.02522	0.677685	0.497972
TRNI	82.9077	2.04987	0.38606	5.30973	1.09787e-07
LOC107984673	1.42007	2.04986	2.16505	0.946796	0.343743
LOC101930094	21.4684	2.04914	0.527064	3.88784	0.000101139
LOC105378000	4.29416	2.04911	0.705082	2.9062	0.00365847
CD40LG	7.27428	2.04864	1.11777	1.83278	0.0668349
KRT18P57	19.8782	2.0474	0.480932	4.25716	2.07044e-05
MUC16	4.082	2.0473	1.29297	1.58341	0.113329
RPL9P11	20.46	2.04642	0.797475	2.56612	0.0102843
POSTN	0.884004	2.04621	2.58353	0.792022	0.428348
RNF11P1	1.13146	2.04595	1.79172	1.14189	0.253498
LOC105377582	0.388235	2.04563	3.02537	0.676158	0.498941
ST13P1	0.697111	2.04448	2.08243	0.981775	0.32621
RPS16P7	0.704476	2.04343	1.66707	1.22576	0.220287
NPY5R	0.703917	2.04302	2.65001	0.770949	0.440737
DPY19L1P1	29.9725	2.04108	0.346796	5.88554	3.96753e-09
KANK1P1	0.387456	2.04099	3.02552	0.674592	0.499935
LOC101929322	0.387456	2.04099	3.02552	0.674592	0.499935
LOC105369692	0.387123	2.04067	3.02553	0.674485	0.500003
MIR29A	2.80524	2.0397	0.720836	2.82963	0.00466022
FEM1AP4	0.382689	2.03945	2.95276	0.690693	0.489758
LINC02205	19.6075	2.03871	0.475651	4.28614	1.81804e-05
CPP	0.524583	2.03846	1.91799	1.06281	0.287869
LOC105374907	4.80658	2.03833	0.761919	2.67526	0.00746711
C12orf71	1.56506	2.03709	1.27865	1.59316	0.111125
SDCBPP1	17.6116	2.03633	0.466555	4.36462	1.27346e-05
RPL9P32	1.33958	2.03598	1.22108	1.66736	0.095443
LOC105373848	0.381548	2.03541	3.0257	0.672707	0.501134
LOC105378973	0.386085	2.03504	3.02571	0.672584	0.501212
LOC107985968	0.386085	2.03504	3.02571	0.672584	0.501212
SLC13A1	1.11595	2.03489	1.78414	1.14055	0.254059
LOC102724463	13.4508	2.03475	0.580998	3.50217	0.000461481
RN7SL127P	4.00694	2.03453	0.656449	3.09929	0.00193982
LOC105371356	1.62421	2.03449	1.57529	1.29151	0.196528
LOC105375767	4.21971	2.03418	0.913965	2.22567	0.0260364
LOC107986986	1.78837	2.03319	1.90077	1.06967	0.284769
LINC01354	5.46953	2.03108	0.979964	2.07261	0.038209
KRTAP24-1	0.873601	2.03061	1.80715	1.12365	0.261162
LOC107986516	1.60275	2.02975	1.7345	1.17022	0.241912
IRGQ	665.195	2.02883	0.317052	6.39906	1.56338e-10
CXCR6	2.50894	2.02767	1.31919	1.53706	0.124278
PRKACG	0.378931	2.02635	2.95923	0.684755	0.493498
TBC1D32	73.5614	2.02566	0.425515	4.76048	1.93131e-06
LINC01288	0.378798	2.02565	3.02601	0.669413	0.503232
LOC105376926	0.378554	2.02484	3.02604	0.669137	0.503408
LOC100505642	28.191	2.02312	0.350249	5.77623	7.63916e-09
RN7SL57P	10.878	2.02255	0.403171	5.01659	5.25957e-07
CTBP2P9	2.62276	2.02169	1.1628	1.73865	0.0820967
IL6	0.381681	2.02137	3.02615	0.667967	0.504155
LOC112268025	0.381681	2.02137	3.02615	0.667967	0.504155
RPL34P34	1.10543	2.02132	1.27989	1.57929	0.11427
OR2F1	0.382426	2.02089	2.56041	0.789284	0.429946
LOC101928636	0.863437	2.0204	2.58331	0.782096	0.434158
RN7SL566P	19.1966	2.02009	0.372999	5.41581	6.1011e-08
PSMD8P1	26.0495	2.01826	0.406785	4.96149	6.99557e-07
LOC105369818	1.92529	2.01784	1.39018	1.4515	0.14664
SYP-AS1	1.33449	2.01735	1.56144	1.29198	0.196364
LOC105371668	0.376469	2.01724	3.02629	0.666572	0.505046
LOC105375208	3.18297	2.01715	0.95949	2.10231	0.0355259
SNORD56B	36.9639	2.01713	0.512869	3.93303	8.38808e-05
COL8A2	2.16871	2.01706	1.04019	1.93912	0.0524863
LOC642381	0.376336	2.01696	3.0263	0.666477	0.505106
LOC105375905	0.376336	2.01696	3.0263	0.666477	0.505106
LOC112267973	2.52918	2.01493	1.69905	1.18591	0.235656
P4HA3	0.883664	2.01425	2.57937	0.780909	0.434856
LINC00498	9.16217	2.01416	0.607575	3.31508	0.000916163
GTF2IP23	5.55456	2.01396	0.823685	2.44506	0.014483
PLS3-AS1	0.379771	2.01332	3.02642	0.665248	0.505892
LOC100421309	98.4981	2.01284	0.240079	8.38406	5.11345e-17
RPL31P43	1.56102	2.01222	1.46488	1.37364	0.169553
PGM5	213.458	2.01205	0.355501	5.65975	1.51594e-08
RN7SL4P	613.001	2.0116	0.277747	7.24255	4.4031e-13
MED28P1	1.4307	2.01058	1.15385	1.7425	0.0814217
LOC105375541	2.78385	2.0101	1.23481	1.62786	0.103554
SLAMF6P1	0.697606	2.00876	1.64256	1.22294	0.221351
LOC107984356	4.3578	2.00855	0.925991	2.16908	0.0300765
RNU6ATAC	1.83328	2.00825	0.902864	2.22431	0.0261277
RPSAP10	0.518599	2.00781	2.42766	0.827059	0.408204
LOC105377889	0.674529	2.0071	2.68233	0.748269	0.454298
TXNP5	0.528391	2.00704	1.90937	1.05115	0.293188
DARS-AS1	280.165	2.0065	0.439245	4.56805	4.9228e-06
TRAV23DV6	0.686803	2.00623	3.0095	0.666633	0.505006
NLRP13	0.381897	2.00582	3.02667	0.662716	0.507513
CNBD1	0.381897	2.00582	3.02667	0.662716	0.507513
MESTP3	0.381897	2.00582	3.02667	0.662716	0.507513
ZNF736P7Y	0.381897	2.00582	3.02667	0.662716	0.507513
ARHGEF3-AS1	0.381897	2.00582	3.02667	0.662716	0.507513
LOC107985145	0.381897	2.00582	3.02667	0.662716	0.507513
LOC107985880	0.381897	2.00582	3.02667	0.662716	0.507513
LOC107986610	0.381897	2.00582	3.02667	0.662716	0.507513
PRKCE-AS1	0.861622	2.00469	1.99222	1.00626	0.31429
NXPE1	0.854394	2.00404	2.32417	0.862258	0.388545
DPRXP4	25.2578	2.00276	0.454809	4.40351	1.06512e-05
RPS24P5	2.35609	2.00215	1.08479	1.84566	0.0649415
LOC105370866	143.267	2.00209	0.393954	5.08204	3.73402e-07
LINC00939	0.376511	2.00202	3.02679	0.661435	0.508333
LOC100130618	0.376511	2.00202	3.02679	0.661435	0.508333
LOC105369874	0.376511	2.00202	3.02679	0.661435	0.508333
LOC105378036	0.376511	2.00202	3.02679	0.661435	0.508333
RNA28SN3	38007.8	2.00123	0.273881	7.30693	2.73317e-13
MIR4786	1.88675	2.00117	1.03217	1.9388	0.0525259
PCMTD1P5	0.37609	2.00084	2.56863	0.778951	0.436008
LOC107986411	1.71015	2.00054	1.15043	1.73895	0.0820431
NRCAM	1.99575	2.00043	1.43907	1.39008	0.164505
RPL7AP37	0.380319	2.00026	3.02685	0.66084	0.508715
RWDD4P1	10.867	2.00009	0.478744	4.17779	2.94359e-05
LL22NC01-81G9.3	0.66288	1.99977	2.02597	0.987069	0.323609
LOC105374475	1.76516	1.99932	1.55687	1.28419	0.199075
LOC105378046	1.8345	1.99907	1.42821	1.3997	0.161602
LOC730098	95.5981	1.99838	0.424868	4.70352	2.55713e-06
LOC105369468	0.371124	1.9983	3.02691	0.660178	0.50914
LOC105370077	0.371124	1.9983	3.02691	0.660178	0.50914
LOC107986850	0.371124	1.9983	3.02691	0.660178	0.50914
KLF9	104.476	1.9982	0.437897	4.56318	5.0384e-06
LOC107984897	0.668275	1.99651	2.32563	0.858482	0.390626
LOC100101483	0.854269	1.99642	1.76749	1.12952	0.258678
PDSS1P1	15.2492	1.99574	0.437573	4.56092	5.09307e-06
RPS3AP36	0.374909	1.99551	2.55739	0.780292	0.435219
SMARCE1P1	2.79767	1.995	0.948716	2.10284	0.0354799
PLPPR5	0.374238	1.99475	2.9775	0.669939	0.502896
MMP12	0.378741	1.99469	3.02703	0.658959	0.509922
ARL2BPP7	0.378741	1.99469	3.02703	0.658959	0.509922
NDUFB4P3	0.378741	1.99469	3.02703	0.658959	0.509922
LOC105372795	0.374834	1.99465	2.5574	0.779952	0.435419
ECRG4	0.373714	1.9945	3.02704	0.658894	0.509964
IFITM3P7	0.691681	1.99405	1.39949	1.42484	0.154205
IGSF3	10.7942	1.99315	0.723064	2.75653	0.00584176
LOC101928078	1.09516	1.99313	1.59436	1.25012	0.211257
LOC105379133	0.665291	1.99261	2.03304	0.980114	0.32703
FUNDC2P2	0.523421	1.99216	1.85668	1.07296	0.283287
TNFRSF11B	0.377162	1.9891	3.02722	0.657072	0.511135
MIXL1	0.377162	1.9891	3.02722	0.657072	0.511135
LOC101927404	0.377162	1.9891	3.02722	0.657072	0.511135
LOC105376484	0.377162	1.9891	3.02722	0.657072	0.511135
LOC107985032	16.8595	1.98797	0.364241	5.45786	4.81918e-08
FLJ37201	0.372282	1.98785	3.02726	0.656651	0.511406
AGR3	0.664178	1.98765	2.32112	0.856335	0.391813
LOC100420429	1.90997	1.98737	0.864526	2.2988	0.0215165
DEPDC1	1.79225	1.98696	1.40844	1.41076	0.158316
CASC6	0.371776	1.98545	3.02734	0.65584	0.511927
LOC102724153	0.371776	1.98545	3.02734	0.65584	0.511927
LOC105370586	0.371776	1.98545	3.02734	0.65584	0.511927
BSND	4.08081	1.98495	1.27191	1.56061	0.118617
LOC105373673	9.88808	1.98482	0.444498	4.46531	7.99528e-06
LOC105379379	0.371605	1.98457	2.98208	0.665501	0.50573
COCH	26.1405	1.98433	1.21213	1.63706	0.101618
RPSAP23	0.375584	1.98349	3.02741	0.655179	0.512353
LOC101927709	0.375584	1.98349	3.02741	0.655179	0.512353
LOC105372026	0.375584	1.98349	3.02741	0.655179	0.512353
LOC112268071	0.375584	1.98349	3.02741	0.655179	0.512353
SHQ1P1	4.86159	1.98317	1.27277	1.55815	0.119197
MIR340	0.86692	1.98206	1.76998	1.11982	0.262791
TLL1	1.08801	1.98161	1.99072	0.995424	0.31953
LOC101928386	24.7236	1.98144	0.332631	5.95685	2.57145e-09
LOC105375161	1.54072	1.98021	1.61031	1.22971	0.218806
RPS29P16	0.849776	1.97856	1.24902	1.58409	0.113173
LOC107985156	0.374005	1.97787	3.0276	0.653281	0.513575
LOC105372275	1.06718	1.97706	1.45229	1.36134	0.173406
VTRNA1-3	0.36969	1.97661	1.98438	0.996086	0.319208
CAGE1	7.32393	1.97542	0.626012	3.15556	0.0016019
MTRNR2L1	15.9283	1.97532	0.90226	2.1893	0.0285749
SNORD21	1.56006	1.97409	1.00017	1.97376	0.0484095
LINC01852	69.1283	1.97388	0.52713	3.74457	0.000180701
FRY-AS1	181.333	1.9737	0.540774	3.64978	0.000262469
IGSF9	73.5776	1.97368	0.547965	3.60184	0.000315973
LOC107984615	0.661025	1.97335	2.68563	0.734782	0.462472
LOC107984000	4.48592	1.97283	0.797852	2.47267	0.0134107
ADGRL4	1.67968	1.97257	1.72524	1.14336	0.252889
LOC105378497	0.673746	1.97228	2.31701	0.851218	0.394648
FABP1	0.372427	1.97222	3.02779	0.651375	0.514805
TRPC4	0.372427	1.97222	3.02779	0.651375	0.514805
ARMC4	0.372427	1.97222	3.02779	0.651375	0.514805
RLFP1	0.372427	1.97222	3.02779	0.651375	0.514805
GPR101	0.372427	1.97222	3.02779	0.651375	0.514805
UBE2QL1	0.372427	1.97222	3.02779	0.651375	0.514805
LINC00410	0.372427	1.97222	3.02779	0.651375	0.514805
FAM71C	0.372427	1.97222	3.02779	0.651375	0.514805
PDILT	0.372427	1.97222	3.02779	0.651375	0.514805
KPNA2P2	0.372427	1.97222	3.02779	0.651375	0.514805
LINC01915	0.372427	1.97222	3.02779	0.651375	0.514805
LOC102724521	0.372427	1.97222	3.02779	0.651375	0.514805
LOC105371204	0.372427	1.97222	3.02779	0.651375	0.514805
LOC105371600	0.372427	1.97222	3.02779	0.651375	0.514805
LOC105371723	0.372427	1.97222	3.02779	0.651375	0.514805
LOC105371833	0.372427	1.97222	3.02779	0.651375	0.514805
LINC01889	0.372427	1.97222	3.02779	0.651375	0.514805
LOC105376635	0.372427	1.97222	3.02779	0.651375	0.514805
LOC105377003	0.372427	1.97222	3.02779	0.651375	0.514805
LINC01930	0.372427	1.97222	3.02779	0.651375	0.514805
DEPDC1P2	4.32825	1.97213	0.621182	3.1748	0.00149941
LOC107985244	0.841549	1.97196	2.28799	0.861873	0.388757
DACT3	1.70168	1.97191	1.55976	1.26424	0.206145
PPP2R5CP	46.649	1.97167	0.2971	6.63639	3.21457e-11
BCLAF1P1	6.67699	1.96961	0.787798	2.50014	0.0124143
LOC105369960	1.87672	1.96864	1.56197	1.26036	0.207539
LOC105373323	2.1548	1.96849	1.53513	1.2823	0.199739
NHS-AS1	0.366926	1.96803	2.99058	0.658076	0.510489
LOC107986902	0.366926	1.96803	2.99058	0.658076	0.510489
EEF1A1P4	3.98725	1.96803	0.579119	3.39832	0.000678018
TAF4B	3.52303	1.96741	1.14049	1.72505	0.0845181
SPATA22	0.366106	1.96696	3.02797	0.649599	0.515951
LOC112268053	1.42312	1.966	1.55673	1.26291	0.206622
LOC105375921	0.365574	1.9649	3.02804	0.648902	0.516401
DAZ3	0.5052	1.96482	2.13637	0.919696	0.357731
LOC105373481	0.366264	1.96412	3.02806	0.648639	0.516571
MDS2	0.364932	1.96253	3.02812	0.648101	0.516919
TRC-GCA23-1	0.661334	1.96251	1.40335	1.39845	0.161978
HNRNPA1P31	0.364969	1.96181	3.02814	0.647858	0.517077
GP2	0.653273	1.96171	1.85193	1.05928	0.289473
IMPDH1P8	1.24333	1.96125	1.62557	1.2065	0.227626
INHBB	17.7216	1.96109	0.51018	3.84391	0.000121089
DMRT2	0.360878	1.96073	3.02818	0.647494	0.517312
TRNQ	63.5173	1.95955	0.399929	4.89974	9.59656e-07
LOC105377280	3.72037	1.9593	1.32819	1.47516	0.140169
MMEL1-AS1	1.46011	1.95907	2.16741	0.903877	0.366061
LOC107986365	0.502429	1.95804	2.17483	0.90032	0.36795
LOC107986108	1.05283	1.95691	2.00478	0.976124	0.329003
LOC101929964	0.499285	1.9564	2.82812	0.691766	0.489084
SIM2	0.499487	1.95639	2.82781	0.69184	0.489038
SNORA113	0.500084	1.95614	2.12973	0.918491	0.358362
FN1	1.04952	1.95213	2.22505	0.877344	0.3803
MYLK4	2.38314	1.95211	1.02278	1.90863	0.0563095
LOC107986435	0.647001	1.95034	1.81703	1.07337	0.283107
LOC105370148	2.49941	1.95011	1.40407	1.3889	0.164863
RPL23AP52	1.05442	1.94999	1.78926	1.08983	0.275789
TRBV3-1	1.1099	1.9484	2.52345	0.772119	0.440044
LOC107984184	3.74704	1.94794	1.24156	1.56895	0.11666
RPL14P6	0.850967	1.94786	1.60419	1.21424	0.224658
LRRC37BP1	0.845953	1.9476	1.79863	1.08283	0.278886
LOC105376167	0.365523	1.94676	3.02866	0.642781	0.520366
MIR5194	57.0489	1.9467	0.335492	5.80252	6.53257e-09
LOC107987309	1.07449	1.94618	1.64657	1.18196	0.237223
SPECC1L-ADORA2A	537.013	1.946	1.29837	1.4988	0.133925
RNU6-589P	1.26077	1.94572	1.41924	1.37096	0.170389
C2orf16	7.84621	1.94564	0.652701	2.98091	0.00287394
LOC107984898	0.650516	1.94516	2.3385	0.831796	0.405524
SNORA40	6.87332	1.94489	0.512017	3.79849	0.00014558
POU6F2	0.644454	1.94453	2.69995	0.720211	0.471395
LOC105375123	0.359885	1.94401	3.02875	0.641852	0.520969
RNA28SN2	37849.6	1.94363	0.26773	7.25967	3.88025e-13
SSR4P1	0.644173	1.94347	2.35925	0.823766	0.410072
PACRG-AS3	0.496128	1.94345	2.43966	0.796605	0.425681
FSIP2	1.45905	1.94337	1.93276	1.00549	0.314659
LOC442244	1.64925	1.94303	1.2622	1.5394	0.123707
TMEM144	5.2087	1.94298	0.725425	2.6784	0.00739745
LOC105373682	1.48703	1.94026	1.9443	0.997925	0.318316
RNU6-1024P	16.5611	1.93979	0.375569	5.16494	2.4052e-07
SLC9B1P1	0.359252	1.93947	3.02891	0.64032	0.521965
SNHG27	0.359252	1.93947	3.02891	0.64032	0.521965
LOC101929902	0.359252	1.93947	3.02891	0.64032	0.521965
LOC105370236	0.359252	1.93947	3.02891	0.64032	0.521965
CSNKA2IP	0.359252	1.93947	3.02891	0.64032	0.521965
SRSF3P2	1.04705	1.93936	1.78013	1.08945	0.275956
DUXAP9	1.32677	1.93904	1.35726	1.42865	0.153106
TBILA	0.358344	1.93819	3.01834	0.642139	0.520783
ZNF33BP1	0.358701	1.93789	3.02138	0.641394	0.521267
DLEU2L	7.35201	1.93681	0.655618	2.95418	0.00313501
LOC107985163	0.840545	1.93575	2.28241	0.848117	0.396373
NDNF	3.93521	1.93501	1.44596	1.33822	0.180824
LOC105376242	0.648685	1.93405	2.69833	0.716758	0.473523
CALM1P2	0.493294	1.93385	2.44904	0.789635	0.429741
LOC105374418	33.6971	1.93289	0.401888	4.80953	1.51285e-06
LINC02395	0.362077	1.93284	3.02914	0.638084	0.523419
PMCH	1.92711	1.9325	1.90928	1.01216	0.31146
NR1I2	0.500013	1.93206	2.15335	0.897232	0.369595
TERC	0.655291	1.93201	2.04338	0.945501	0.344403
LINC02009	1.63504	1.93137	1.92253	1.0046	0.315089
MIR374B	2.37633	1.9308	0.787179	2.45281	0.0141743
STK32A-AS1	2.1543	1.92908	1.73305	1.11311	0.265661
AKAP6	3.71876	1.92903	1.4298	1.34916	0.177285
LINC01108	0.826232	1.92879	2.28332	0.844729	0.398262
PRL	1.06887	1.92864	2.5379	0.759934	0.447294
MGC12916	31.2092	1.9283	0.647076	2.98002	0.00288232
HNRNPA1P67	0.356095	1.92804	3.0293	0.636461	0.524476
LOC105371877	0.356095	1.92804	3.0293	0.636461	0.524476
LOC105375688	0.356095	1.92804	3.0293	0.636461	0.524476
LOC107983998	129.333	1.92792	0.360431	5.34893	8.84749e-08
RNU6-510P	1.76883	1.92768	0.86658	2.22447	0.0261168
SNORA78	41.3062	1.92702	0.458115	4.20641	2.59455e-05
OR10AD1	2.67952	1.92612	1.26426	1.52352	0.127627
NALCN-AS1	1.03516	1.92503	2.54124	0.757516	0.448741
RPL31P2	0.81383	1.925	1.77032	1.08738	0.27687
LOC100420869	0.483479	1.92487	2.49021	0.772976	0.439537
LOC105375181	0.658125	1.9246	2.34675	0.820114	0.412151
RPSAP75	6.33897	1.92433	0.601009	3.20183	0.00136559
LOC100418701	0.359209	1.92366	3.02946	0.634985	0.525438
LOC107986275	3.16637	1.92352	1.41587	1.35854	0.174292
SHISA7	0.3592	1.92302	3.02948	0.63477	0.525578
IFNB1	2.15274	1.92273	1.54307	1.24604	0.212748
LOC105371636	27.3899	1.92252	0.525263	3.66011	0.00025211
LOC102724234	0.65144	1.92228	3.01134	0.638346	0.523249
LOC101927418	1.69377	1.92207	1.41291	1.36036	0.173715
ARF1P2	1.0406	1.92192	1.84182	1.04349	0.296724
GAPDHP39	2.35257	1.9219	0.897714	2.14088	0.0322837
DPPA5P4	23.0032	1.92184	0.497808	3.86061	0.000113103
AIFM1P1	0.639693	1.92171	2.70107	0.711464	0.476796
LOC105373195	5.53904	1.92148	0.628402	3.05772	0.0022303
TRAV16	1.22196	1.91999	1.76501	1.08781	0.276679
LOC100420338	7.18655	1.91978	0.589019	3.25928	0.00111694
DAOA-AS1	0.358325	1.91952	3.0296	0.633588	0.52635
RCAN2	1.02605	1.91886	2.23613	0.858116	0.390828
LOC105370877	77.5781	1.91839	0.287417	6.6746	2.47915e-11
LOC105377884	134.804	1.91806	2.54387	0.753994	0.450853
LCA5	1.02761	1.91772	2.23741	0.857116	0.391381
PTPRK	2.15459	1.91767	1.52646	1.25629	0.209011
FBXL2	19.0873	1.91759	0.420174	4.5638	5.02364e-06
LOC105374524	1.65968	1.91681	1.7503	1.09514	0.273457
STX19	6.3845	1.91521	0.468265	4.09002	4.31339e-05
LOC101927513	1.03253	1.91476	1.47297	1.29993	0.193624
TRBV29-1	0.351592	1.91291	3.02983	0.631359	0.527806
PRSS41	0.351592	1.91291	3.02983	0.631359	0.527806
TPTE2P1	1.47922	1.91227	1.9446	0.983374	0.325423
RPL21P20	1.51999	1.9121	1.12641	1.69752	0.0895992
PPIAP42	1.52472	1.91155	1.11884	1.70851	0.0875424
RNU6-2	6.13013	1.91065	0.515861	3.70381	0.000212387
TRNM	69.0851	1.91042	0.359569	5.31307	1.07791e-07
LOC107984139	2.44123	1.91007	1.16516	1.63933	0.101145
RASSF6	1.50066	1.91007	1.42639	1.33909	0.180542
LOC105375828	0.351567	1.91004	3.01944	0.632581	0.527007
DDX4	1.21605	1.90997	1.98189	0.963709	0.335192
LOC110596867	2.5475	1.90921	0.9231	2.06826	0.0386155
BRINP3	2.90953	1.90802	1.30548	1.46155	0.143866
NIPA2P2	0.35506	1.90793	3.03001	0.629679	0.528904
LOC105369543	0.35506	1.90793	3.03001	0.629679	0.528904
MIR6757	0.350138	1.90717	3.0226	0.630971	0.52806
MIR4292	0.349695	1.90692	2.59162	0.735802	0.461851
OR6C76	0.830448	1.90689	2.03403	0.937494	0.348505
WSCD1	0.64698	1.90661	2.68981	0.708827	0.478432
MEOX1	0.349773	1.90599	3.03008	0.629022	0.529335
CHKA	490.611	1.90549	0.512246	3.71987	0.000199322
FKBP6	129.165	1.90522	0.43919	4.33803	1.43766e-05
RPS4XP5	0.650789	1.90492	2.0415	0.933101	0.350768
LOC105372272	2297	1.90485	0.621025	3.06727	0.00216027
LINC02008	0.814041	1.90429	2.27744	0.836154	0.403068
LINC02277	3.53542	1.90414	1.30755	1.45626	0.145319
PCNAP3	0.354185	1.90366	3.03016	0.628238	0.529848
SPART-AS1	0.34913	1.90353	3.03017	0.628193	0.529878
LOC101928957	1.66042	1.90289	1.40953	1.35002	0.177011
MAP3K12	174.326	1.90258	0.314053	6.05816	1.37686e-09
LOC107985977	24.8537	1.90237	0.392251	4.84989	1.23528e-06
SLC22A3	1.43153	1.90199	1.76054	1.08034	0.279991
LOC112268096	1.02705	1.90192	1.76761	1.07598	0.281935
TRAC	165.271	1.90103	1.06382	1.78699	0.0739386
MIR3146	0.815868	1.90044	1.80771	1.05129	0.293124
LOC107984494	7.32319	1.89941	0.789952	2.40446	0.0161965
MIR924HG	1.99275	1.89757	1.42793	1.32889	0.183883
LOC107987150	457.067	1.89688	0.194161	9.76961	1.52029e-22
CTAGE7P	0.822583	1.89505	2.03592	0.930807	0.351954
LOC105377981	0.831438	1.89481	2.60008	0.72875	0.466155
RBP2	0.346668	1.89473	3.03045	0.62523	0.53182
LOC107984692	0.346668	1.89473	3.03045	0.62523	0.53182
RPS23P2	0.482677	1.89386	2.85067	0.664355	0.506463
LOC105372316	0.806354	1.89354	3.00537	0.630052	0.528661
LOC105374600	0.34615	1.89288	3.03051	0.624608	0.532228
LOC105376239	1.89441	1.89276	1.56086	1.21264	0.225269
EEF1A1P16	1.26758	1.89136	1.83145	1.03272	0.301737
LOC105370887	0.345725	1.89094	3.03057	0.623957	0.532656
SLC7A11-AS1	3.893	1.89087	1.11464	1.69639	0.0898118
H3-2	1237.31	1.89043	0.486335	3.88708	0.000101456
LOC100421594	4.06028	1.88983	1.43817	1.31405	0.188829
TRBV11-2	0.345225	1.8896	3.03061	0.623503	0.532954
LOC107984195	0.345225	1.8896	3.03061	0.623503	0.532954
HNRNPA3P3	9.85699	1.88951	0.420885	4.48937	7.14343e-06
RPS29P12	10.17	1.88846	0.502594	3.75742	0.000171671
NRK	0.352332	1.88842	3.03065	0.623109	0.533213
NF1P6	0.352332	1.88842	3.03065	0.623109	0.533213
LOC100129725	0.350318	1.88826	3.03065	0.623052	0.53325
COA6-AS1	123.497	1.88781	0.238036	7.93077	2.17791e-15
MIR3139	0.487092	1.88714	1.89746	0.994566	0.319948
RLN3	0.661379	1.88696	2.68871	0.701809	0.482798
DNAJB6P6	0.344228	1.88579	3.03073	0.622223	0.533795
MIR9-2	0.351112	1.88578	3.03073	0.622218	0.533799
LOC101929762	0.34874	1.88495	3.03076	0.621941	0.533981
LINC01553	0.343918	1.88481	3.03076	0.621892	0.534013
ST7-OT4	0.343872	1.88475	3.03077	0.621874	0.534025
PTTG3P	0.343898	1.88459	3.03077	0.621819	0.534061
LOC105372835	0.635648	1.88393	2.34627	0.802945	0.422007
BTG4	0.619532	1.88322	2.35229	0.800589	0.42337
ZNF771	0.795847	1.88268	2.28218	0.824945	0.409403
LOC107986528	2.31773	1.88212	1.25868	1.49531	0.134834
GABRA3	0.343009	1.88198	2.61406	0.719946	0.471558
SNORD3D	18.659	1.88195	0.523432	3.59541	0.000323885
RPL21P3	0.342976	1.88154	3.03087	0.620792	0.534737
BOLA3P1	0.798391	1.88142	2.28451	0.823555	0.410192
FOXC1	8.53492	1.88052	0.674337	2.78869	0.00529209
LOC105374442	0.343287	1.88016	3.03091	0.620327	0.535043
AIRN	182.874	1.88003	0.495555	3.79379	0.000148365
RPS3AP44	0.648729	1.88	1.40957	1.33374	0.182289
LOC107985100	1.69323	1.87982	0.910682	2.06419	0.0389994
MIR3128	26.4986	1.8788	0.349464	5.37621	7.6068e-08
RPL21P29	2.18741	1.87852	1.14522	1.64031	0.100941
HOXA6	0.342069	1.87828	3.03097	0.619693	0.53546
LOC105374280	0.826746	1.87823	1.84776	1.01649	0.309394
LOC101927947	1.76921	1.87717	1.72262	1.08972	0.275838
ND3	1614.62	1.87686	0.256768	7.30958	2.67983e-13
HSP90AA4P	0.639088	1.87666	1.84182	1.01891	0.308244
LOC105373384	0.341637	1.87654	3.03103	0.619111	0.535843
LOC440982	0.346019	1.87507	3.03108	0.618613	0.536171
HMGB3P32	0.346019	1.87507	3.03108	0.618613	0.536171
LOC105376984	0.346019	1.87507	3.03108	0.618613	0.536171
ANK2-AS1	1.79329	1.87479	1.57473	1.19054	0.233832
CEP55	0.622029	1.87471	2.35187	0.797113	0.425386
LOC105375704	20.4115	1.8742	0.632938	2.96112	0.00306527
SCARNA1	1.74888	1.87384	0.847198	2.21181	0.0269799
ZNF300P1	1.17883	1.87366	2.51475	0.745069	0.45623
FCF1P7	4.79104	1.87319	0.827149	2.26463	0.0235354
RN7SL288P	180.283	1.87317	0.364045	5.14545	2.6688e-07
RPS6KA6	2.03748	1.87311	1.60637	1.16606	0.243592
LOC105376467	5.30014	1.87201	1.20628	1.55189	0.120688
LOC100420050	0.348938	1.8714	3.0312	0.617379	0.536985
TBX18	0.340081	1.87096	3.03121	0.617232	0.537082
CST8	0.340081	1.87096	3.03121	0.617232	0.537082
RPS2P28	0.822874	1.87082	1.63286	1.14573	0.251906
RPEP3	1.01569	1.86847	1.61563	1.15649	0.24748
LOC101928977	6.09973	1.86823	0.809762	2.30713	0.0210474
LOC101927018	59.8771	1.86752	0.284171	6.57181	4.97078e-11
RNVU1-3	15.2718	1.86746	0.459422	4.06481	4.80724e-05
STRCP1	0.338728	1.86585	3.03137	0.615512	0.538217
LINC01876	0.789739	1.86567	2.05799	0.906549	0.364646
LOC105377896	40.5108	1.8648	0.723015	2.5792	0.009903
LINC01981	1.84435	1.86475	1.93132	0.965531	0.334279
GPR176	4.50073	1.86419	1.17115	1.59175	0.11144
RNA5SP473	0.33952	1.86387	2.6184	0.711837	0.476566
LOC100418707	5.09733	1.86367	0.687658	2.71016	0.00672504
HMGB1P8	643.612	1.8631	0.282791	6.58829	4.44932e-11
LOC105370786	0.337764	1.86288	3.03146	0.614517	0.538873
COX7A1	1.83115	1.86259	1.15928	1.60668	0.108125
LOC101927942	3.74046	1.862	1.3971	1.33277	0.182609
LOC105369961	0.611595	1.86006	2.73163	0.680937	0.495912
LOC107987347	88.0116	1.85916	1.6591	1.12058	0.262465
HMGN2P25	17.7952	1.8584	0.463897	4.00605	6.17414e-05
PREX2	2.21777	1.8582	1.73729	1.0696	0.2848
RPL17P8	12.7179	1.85807	0.593967	3.12824	0.00175859
LOC105370765	2.00952	1.85764	1.27714	1.45453	0.145798
RPS3AP12	2.79072	1.85762	0.979157	1.89717	0.0578059
RPS15AP11	1.24431	1.85762	1.38236	1.3438	0.179012
LOC105369618	1.52267	1.85727	1.7789	1.04405	0.296461
PCMTD1P7	3.75646	1.85629	0.587832	3.15785	0.00158935
MIR4752	1.02279	1.85624	1.32378	1.40223	0.160846
RNU6-11P	3.55908	1.85622	0.585019	3.17291	0.00150917
LOC107985327	0.475348	1.85545	2.17951	0.851316	0.394594
MGAM2	157.082	1.85474	0.29285	6.33339	2.39826e-10
ZYG11A	0.815416	1.85451	2.62202	0.707283	0.479391
LOC105372816	0.625227	1.85413	2.70511	0.68542	0.493079
LOC105379418	0.616725	1.85412	2.72379	0.680716	0.496051
LOC100287189	0.62112	1.85274	1.67916	1.10337	0.269865
MYOT	0.791995	1.85239	2.30866	0.802363	0.422343
OR4X1	0.33464	1.85224	3.03177	0.610944	0.541236
C4orf51	0.33464	1.85224	3.03177	0.610944	0.541236
LOC101930149	0.33464	1.85224	3.03177	0.610944	0.541236
RPL10AP12	0.340961	1.85112	3.0318	0.610568	0.541485
PPIAP1	0.472901	1.85092	2.8538	0.64858	0.51661
LOC102724329	3.38134	1.85066	0.925252	2.00017	0.0454823
LOC107984193	0.787783	1.84965	2.63421	0.702164	0.482577
CALM2P1	0.996391	1.84905	1.39208	1.32826	0.184091
MIR128-1	0.80437	1.84884	1.8031	1.02537	0.305188
PRKG2-AS1	0.623407	1.84783	2.70734	0.682526	0.494906
RPL21P79	0.47378	1.84591	1.44935	1.27361	0.2028
KCNK2	0.341066	1.84579	3.03195	0.608778	0.542672
PSG5	0.342644	1.84579	3.03195	0.608778	0.542672
GNAT3	0.341066	1.84579	3.03195	0.608778	0.542672
LINC01538	0.341066	1.84579	3.03195	0.608778	0.542672
PIRT	0.341066	1.84579	3.03195	0.608778	0.542672
TEX50	0.341066	1.84579	3.03195	0.608778	0.542672
IPO7P2	0.347379	1.84579	3.03195	0.608778	0.542672
HINT2P1	0.341066	1.84579	3.03195	0.608778	0.542672
LOC102723413	0.347379	1.84579	3.03195	0.608778	0.542672
LOC105374428	0.347379	1.84579	3.03195	0.608778	0.542672
LOC105376450	0.341066	1.84579	3.03195	0.608778	0.542672
LOC105376755	0.341066	1.84579	3.03195	0.608778	0.542672
LOC101928868	0.332552	1.84507	3.03197	0.608539	0.54283
LOC107987078	0.332552	1.84507	3.03197	0.608539	0.54283
LOC100499497	1.00171	1.84486	2.25697	0.817406	0.413696
ELMO1-AS1	17.3925	1.84485	0.35617	5.1797	2.22238e-07
LOC646709	0.833771	1.84473	1.79659	1.0268	0.304516
LOC107986190	2.74641	1.8439	1.27621	1.44482	0.148507
OR2C3	0.332163	1.84374	3.03201	0.608092	0.543127
MIR6763	0.332163	1.84374	3.03201	0.608092	0.543127
PPIAL4D	0.473109	1.84354	2.5008	0.737178	0.461014
CCT6P4	0.606677	1.84347	2.36296	0.780153	0.435301
RN7SL620P	0.462613	1.84297	1.91122	0.964292	0.334899
MIR4324	1.71556	1.84273	0.944042	1.95196	0.0509428
MARCKSL1P1	12.8163	1.84247	0.583755	3.15623	0.00159821
H2AC4	20.5353	1.84232	0.540161	3.41069	0.000647976
LOC105369301	0.344115	1.84197	3.03206	0.607499	0.54352
MIR4315-2	9.94332	1.84142	0.405435	4.54184	5.57655e-06
MUC6	4.36508	1.84118	0.950065	1.93796	0.0526286
MIR548D1	0.33132	1.84067	3.0321	0.607062	0.54381
MIR181A1HG	17.5769	1.84007	0.634651	2.89934	0.00373955
LOC644135	0.337693	1.83966	3.03213	0.606724	0.544034
RNU6-445P	0.779557	1.83948	1.48551	1.23828	0.215612
C1orf105	3.35411	1.83937	0.895095	2.05495	0.039884
GABRB2	2.39729	1.83898	1.30351	1.41078	0.158308
LOC112268301	49.4678	1.83867	0.325568	5.64759	1.62711e-08
LOC402634	0.330588	1.8383	3.03217	0.606265	0.544339
PKIB	2.73167	1.8376	0.889458	2.06598	0.0388306
SNORD3B-1	16.0899	1.83693	0.499929	3.67438	0.000238425
RPL21P60	59.0308	1.8369	0.279708	6.5672	5.12687e-11
ME2P1	2.31629	1.83657	1.59534	1.15121	0.249647
LOC105377254	1.37167	1.83653	1.74969	1.04963	0.293889
TCP1P1	0.801901	1.83652	2.62115	0.700652	0.48352
CFL1P3	0.61633	1.83599	1.3993	1.31208	0.189494
HORMAD2	4.06769	1.83576	0.877058	2.09309	0.0363414
PRELID3BP1	0.793012	1.83553	2.0502	0.895293	0.370631
B3GALNT2P1	0.779523	1.8353	2.29751	0.798821	0.424394
RPL34P31	0.618846	1.83522	1.89482	0.968544	0.332773
RPL7P29	0.329687	1.83519	3.03226	0.605222	0.545031
PCDHB9	2.14559	1.8351	1.71828	1.06798	0.285528
SNORD129	6.38933	1.83391	0.647658	2.8316	0.00463161
LOC105377225	2.56096	1.83385	1.71519	1.06919	0.284986
MIR4422	1.00082	1.83338	1.46198	1.25404	0.209826
LOC101928007	3.29354	1.83225	1.09248	1.67715	0.0935133
CCDC63	0.332773	1.83103	3.03238	0.603827	0.545959
LINC01555	0.332773	1.83103	3.03238	0.603827	0.545959
AADAC	2.16428	1.82909	1.33901	1.366	0.171939
RPS19P1	9.10374	1.82826	0.895875	2.04075	0.0412753
HSPD1P9	0.327661	1.82816	3.03247	0.602861	0.546601
LINC02051	0.617613	1.82752	2.70946	0.674496	0.499996
LOC105372654	5.60912	1.82752	1	1.82752	0.0676221
ZNF214	2.32846	1.82678	1.39198	1.31236	0.189399
LOC101928016	0.794384	1.82677	2.28232	0.800402	0.423478
MIR92A1	0.601678	1.82664	2.06377	0.885098	0.376104
LINC01518	1.16233	1.8243	1.98192	0.920471	0.357327
BTF3P4	0.464306	1.82415	2.46556	0.739851	0.45939
LOC100533722	0.6048	1.82322	2.73266	0.667198	0.504646
RPL17P24	4.60014	1.82303	0.649552	2.8066	0.00500673
ZBED6	234.701	1.82289	0.228258	7.9861	1.39277e-15
COPG2IT1	11.3615	1.82208	0.443267	4.11057	3.94685e-05
LOC107987100	1.59928	1.81978	1.41422	1.28677	0.198175
RAB12	51.6418	1.81969	0.298317	6.09985	1.06167e-09
SUPT20HL1	1.29048	1.81879	1.64272	1.10719	0.268214
SCG2	0.333346	1.81869	3.03274	0.599684	0.548717
LINC01607	0.336502	1.81869	3.03274	0.599684	0.548717
YBX1P2	1.48868	1.81795	0.929828	1.95515	0.0505657
ZNF887P	0.324734	1.81794	3.03277	0.599434	0.548884
HCP5B	2.8588	1.81789	1.13284	1.60471	0.108557
LINC00399	3.37828	1.81738	1.1388	1.59587	0.110517
PSMD14P1	1.45719	1.81726	1.28237	1.4171	0.156453
LOC101927452	0.614284	1.8167	1.87453	0.969147	0.332472
LOC105370489	108.187	1.81658	0.288262	6.30184	2.94137e-10
GAPDHP60	11.2161	1.81626	0.578065	3.14196	0.00167819
MPP5	522.546	1.81588	0.322569	5.62941	1.80826e-08
HMGB3P20	0.332801	1.81571	3.03283	0.598683	0.549384
PLPPR1	0.60657	1.81508	2.35609	0.770379	0.441075
LOC107984695	0.77592	1.81494	2.02527	0.896145	0.370175
RNVU1-19	4.83966	1.81451	0.803598	2.25799	0.0239466
PIK3IP1-DT	13.9024	1.81413	0.474249	3.82526	0.000130634
RN7SL2	1272.89	1.81338	0.333653	5.43491	5.48227e-08
PMP22	2.40555	1.8122	1.74821	1.03661	0.29992
HSD11B1	6.49975	1.8115	0.628302	2.88317	0.00393693
TRS-AGA5-1	1.86595	1.81137	0.8116	2.23185	0.0256246
YRDCP1	4.78293	1.81106	0.88576	2.04464	0.0408908
EEF1A1P17	0.767685	1.81092	2.08222	0.869708	0.38446
LINC02453	1.14673	1.81073	1.75157	1.03377	0.301243
ADH4	0.338902	1.81059	3.03298	0.596967	0.550529
LIMS1-AS1	2.99888	1.81048	1.04819	1.72725	0.0841232
LOC105374494	1.79536	1.81033	1.57189	1.15169	0.249447
LYPD9P	1.13334	1.81027	1.98292	0.912931	0.361279
HIGD2B	1.34784	1.81026	1.38973	1.3026	0.192712
ORM2	702.863	1.80968	0.514591	3.51673	0.00043689
LINC01938	3.71749	1.80944	1.20917	1.49644	0.13454
LOC105371629	1.34622	1.80907	1.76614	1.02431	0.305689
MIR3064	318.755	1.80874	0.307855	5.8753	4.22075e-09
LOC107986699	5.15651	1.80872	0.780521	2.31732	0.0204861
SNORD3C	14.7687	1.80859	0.518378	3.48894	0.000484936
MARK1	0.595082	1.8072	2.73723	0.660231	0.509106
CCDC58P1	6.94131	1.80659	0.613633	2.94409	0.00323901
LINC02541	2.07347	1.80569	1.71267	1.05432	0.291738
LOC112268150	38.3915	1.80498	0.405111	4.45552	8.36889e-06
FIBIN	0.598596	1.80471	2.37733	0.759136	0.447771
LOC105370247	1.4574	1.80442	1.73988	1.0371	0.299691
FTH1P24	1.9045	1.80416	1.08173	1.66784	0.0953465
OR4C46	0.342256	1.8037	3.03319	0.594655	0.552074
LOC400347	0.335943	1.8037	3.03319	0.594655	0.552074
NRIP3	20.6966	1.80355	0.543048	3.32117	0.000896418
UGT2B25P	0.597136	1.80333	2.37215	0.76021	0.447129
LINC02015	0.598486	1.80331	2.37084	0.760621	0.446884
STON1-GTF2A1L	2.5772	1.80248	1.41006	1.2783	0.201143
SNORD45B	1.70308	1.80241	0.837597	2.15189	0.0314063
NAP1L6P	0.455743	1.80237	2.16055	0.834218	0.404158
TNFSF18	0.33755	1.80222	3.03323	0.594158	0.552407
CCDC85A	0.332814	1.80222	3.03323	0.594158	0.552407
TBPL2	0.33755	1.80222	3.03323	0.594158	0.552407
TMEM256P1	0.33755	1.80222	3.03323	0.594158	0.552407
LOC105373720	0.332814	1.80222	3.03323	0.594158	0.552407
LOC107985949	144.1	1.80158	0.315446	5.71121	1.12176e-08
GAPDHP63	1.19582	1.80135	0.995152	1.81013	0.0702761
LINC02066	1.30232	1.80129	1.95488	0.92143	0.356826
RNU6-611P	12.3787	1.80113	0.385007	4.67818	2.89438e-06
LOC102723530	2.16226	1.8007	1.17906	1.52723	0.126705
LINC01873	0.985529	1.7998	1.79403	1.00322	0.315756
MIR137HG	0.319611	1.79974	3.03331	0.593326	0.552963
RN7SL3	136.851	1.79962	0.277624	6.4822	9.03922e-11
LOC107985259	103.5	1.79848	0.418867	4.29367	1.7574e-05
NEGR1	7.53515	1.79781	0.884955	2.03153	0.0422014
LOC107984791	0.778975	1.79776	2.61513	0.687446	0.491802
LOC105374341	96.7962	1.79711	0.411225	4.37014	1.24169e-05
RN7SKP292	109.438	1.79686	0.429096	4.18755	2.81981e-05
LOC105376410	6.09006	1.79668	0.6096	2.94731	0.00320547
SPINK6	0.993469	1.79534	2.01294	0.891897	0.372448
SOX5	3.22057	1.79506	1.39484	1.28692	0.198121
CD46P1	9.45471	1.7949	0.648531	2.76764	0.00564641
LOC102723955	20.4218	1.79423	0.54675	3.28162	0.00103211
LOC105374542	25.4009	1.79324	0.418658	4.28329	1.84148e-05
LOC400710	2.53218	1.79292	1.32278	1.35541	0.175285
LOC107985850	4.67301	1.79191	0.650556	2.75443	0.0058794
UGT3A1	0.445236	1.7917	2.48268	0.721678	0.470492
SCRG1	37.4032	1.7915	0.542965	3.29948	0.000968635
LOC729930	0.321215	1.79073	3.03358	0.590301	0.554989
C10orf55	410.619	1.79008	0.780359	2.29392	0.021795
OR2AT4	0.781145	1.78993	2.00371	0.893309	0.371692
B3GALT2	91.0128	1.78993	0.275704	6.49221	8.45877e-11
ACBD3-AS1	4.91703	1.78974	0.512559	3.49177	0.000479828
NSA2P7	1.92339	1.78972	0.841759	2.12616	0.0334897
INSYN2B	203.446	1.78962	0.218957	8.17337	2.99889e-16
LOC105378895	3.47558	1.78918	0.846984	2.11242	0.0346507
ORM1	5583.07	1.78851	0.484929	3.68819	0.000225851
NASPP1	209.073	1.78824	0.462898	3.86314	0.00011194
NDUFB3P4	94.2001	1.78815	0.327381	5.462	4.70805e-08
LOC101927855	1.69349	1.78765	0.952381	1.87703	0.0605137
SPON1	0.320327	1.78764	3.03367	0.589268	0.555682
SRPX2	0.320327	1.78764	3.03367	0.589268	0.555682
LOC101927787	0.320327	1.78764	3.03367	0.589268	0.555682
LINC01149	0.320327	1.78764	3.03367	0.589268	0.555682
LOC105375216	0.320327	1.78764	3.03367	0.589268	0.555682
LOC105377030	0.320327	1.78764	3.03367	0.589268	0.555682
SYBU	0.955073	1.78745	1.99691	0.895109	0.370729
NR2F2	0.603262	1.78696	2.35013	0.760367	0.447035
LOC105376272	0.976076	1.78653	2.00552	0.890804	0.373034
SMCR5	3.03044	1.7864	0.944845	1.89068	0.0586675
ZIC5	1.33237	1.78635	2.19504	0.813813	0.415752
DPY19L4P1	34.9396	1.78582	0.243773	7.32576	2.37556e-13
BRINP1	0.961748	1.78534	2.26827	0.787093	0.431228
RPL23AP64	18.5068	1.78533	0.309271	5.7727	7.80099e-09
PSG8-AS1	0.601996	1.78499	3.01459	0.592116	0.553773
SPRY4-AS1	0.319583	1.78468	3.03376	0.588273	0.556349
ANKRD20A1	4.01975	1.78455	1.09968	1.6228	0.104633
SNX18P12	0.333495	1.78395	2.63525	0.676956	0.498434
ULBP3	0.597977	1.78359	2.36112	0.755398	0.45001
LOC105373193	0.447862	1.78314	2.89299	0.616366	0.537653
RPS18P5	6.16776	1.78296	0.560658	3.18012	0.00147216
PA2G4P6	324.499	1.78286	0.352447	5.05853	4.22497e-07
LOC101929305	3.85852	1.78241	1.16372	1.53165	0.125609
LOC105373284	13.6886	1.78172	0.440555	4.04427	5.24873e-05
LOC105373730	7.7618	1.78104	0.68617	2.59563	0.0094417
UBBP5	0.597115	1.78103	1.86108	0.956989	0.338573
LOC105377461	0.58378	1.78054	2.07441	0.858333	0.390709
UXT-AS1	8.99718	1.77873	0.661824	2.68761	0.00719644
LOC100131625	1.53161	1.77871	1.73077	1.02769	0.304093
RPL34P4	2.1564	1.77848	1.07586	1.65307	0.0983171
MIR6739	0.325052	1.77759	3.03398	0.585893	0.557947
ERC2	1.14109	1.77725	1.37033	1.29695	0.194647
RPL7P49	4.04512	1.7763	0.826086	2.15026	0.0315349
LOC107986273	0.975078	1.77614	1.98784	0.893504	0.371587
MYEF2	10.5325	1.77588	0.870914	2.0391	0.0414399
TRBV4-2	0.797439	1.77572	2.60761	0.680976	0.495887
SNORA79	0.769943	1.77552	1.6702	1.06306	0.287756
PAFAH1B1P2	20.0095	1.77474	0.395932	4.48243	7.37974e-06
LOC202319	0.771468	1.77468	1.27358	1.39345	0.163482
LAP3P2	0.445811	1.77325	2.50903	0.706749	0.479723
LOC105373303	0.58977	1.77311	2.75421	0.64378	0.519718
LOC112267992	0.753082	1.77237	2.64471	0.670157	0.502758
RORC	0.584744	1.77178	2.75597	0.642887	0.520297
LOC102724146	313.656	1.7716	0.389009	4.55414	5.2601e-06
PSMC1P7	1.13366	1.77159	1.63561	1.08314	0.278746
SLC6A14	0.780182	1.77159	2.62807	0.674103	0.500246
CNGA4	7.15495	1.77068	0.795801	2.22503	0.0260792
LOC105375060	50.3117	1.77063	0.588775	3.00731	0.0026357
MIR505	6.11655	1.7698	0.497653	3.55629	0.00037613
FGF14	6.26806	1.76951	1.28504	1.37701	0.16851
TMEM30B	0.960128	1.7692	2.2687	0.779831	0.43549
RPL36AP16	1.18905	1.76825	1.16324	1.5201	0.128485
NBEAP1	1.11937	1.76796	1.77951	0.993508	0.320462
LOC105372489	8.97803	1.76743	0.750862	2.35386	0.0185794
MKX	4.16885	1.76714	0.984706	1.79458	0.0727199
LOC107984814	0.597432	1.76623	2.36561	0.746625	0.45529
LOC105378843	1.32093	1.76602	1.61039	1.09664	0.272798
TRNV	57.3859	1.76557	0.362294	4.8733	1.09747e-06
MEP1AP3	0.767479	1.76521	1.83159	0.963757	0.335168
LOC105371361	2.87256	1.76516	1.42731	1.2367	0.216199
PLCZ1	0.769173	1.76502	1.67382	1.05449	0.291659
LINC01857	0.766225	1.76491	2.63843	0.668923	0.503544
RN7SL832P	209.346	1.76484	0.439449	4.01604	5.91852e-05
CXCL2	3615.08	1.76463	0.743496	2.37342	0.0176242
LOC101929540	62.8347	1.76424	0.232225	7.5971	3.02849e-14
LOC105376730	0.451458	1.76317	2.49934	0.705455	0.480527
SNORA74B	3.49388	1.76311	0.806172	2.18702	0.0287414
RUNDC3B	11.6063	1.76301	0.532497	3.31083	0.000930192
SLCO5A1	362.953	1.76157	0.23191	7.59593	3.05592e-14
LOC390308	1.31931	1.76141	1.76937	0.995498	0.319494
CTBP2P10	2.98593	1.76056	0.945414	1.86221	0.0625731
LOC105371771	0.324571	1.75908	3.03454	0.579687	0.562126
LOC105377714	0.946517	1.75837	2.01534	0.872495	0.382939
SNRPGP4	5.32292	1.75815	0.639571	2.74895	0.00597868
TLCD1	6.268	1.75802	1.05491	1.66652	0.0956093
RNU6-1062P	0.966029	1.75801	1.20105	1.46373	0.143268
MIR15B	3.78371	1.75781	0.736406	2.38701	0.0169862
PABPC1P7	0.324249	1.75743	3.03459	0.579133	0.562499
LOC107984160	1.80523	1.75715	1.43081	1.22808	0.219416
RPP38-DT	31.7536	1.75693	0.462469	3.79903	0.000145264
LOC105371516	0.317947	1.75686	3.03461	0.578942	0.562628
LINC00992	2.96964	1.75672	1.42792	1.23027	0.218598
LOC105376535	1.34589	1.75629	1.76449	0.995354	0.319564
LOC107986370	0.583457	1.75626	2.75929	0.636491	0.524457
TMEFF2	2.10677	1.75591	1.2852	1.36626	0.171858
NDUFA5P1	0.322549	1.75588	2.66519	0.658819	0.510012
SRD5A1P1	0.745218	1.75555	2.64897	0.662728	0.507505
C4orf45	3.64054	1.75551	1.07985	1.62569	0.104015
FOXL1	0.33012	1.75505	3.03466	0.578335	0.563038
POU3F4	0.33012	1.75505	3.03466	0.578335	0.563038
LOC105372161	0.33012	1.75505	3.03466	0.578335	0.563038
LOC105377436	0.33012	1.75505	3.03466	0.578335	0.563038
DRD1	0.325385	1.75505	3.03466	0.578335	0.563038
MAPK6P6	0.325385	1.75505	3.03466	0.578335	0.563038
ACTR3BP1	0.325385	1.75505	3.03466	0.578335	0.563038
RPL21P109	0.325385	1.75505	3.03466	0.578335	0.563038
MTRNR2L7	0.325385	1.75505	3.03466	0.578335	0.563038
LOC105370363	0.325385	1.75505	3.03466	0.578335	0.563038
LOC105371557	0.325385	1.75505	3.03466	0.578335	0.563038
LOC105372683	0.325385	1.75505	3.03466	0.578335	0.563038
LOC105377654	0.325385	1.75505	3.03466	0.578335	0.563038
LINC02465	0.325385	1.75505	3.03466	0.578335	0.563038
BMP10	7.62932	1.75443	0.666734	2.63138	0.00850385
LOC151760	1.37019	1.75342	1.74994	1.00199	0.31635
YRDCP2	1.46766	1.75342	1.17659	1.49025	0.136159
HNRNPA1P22	1.90034	1.75339	1.44354	1.21465	0.2245
LACTB2-AS1	17.3156	1.75291	0.635972	2.75626	0.00584658
HSPE1P11	12.0795	1.7528	0.3988	4.39518	1.10682e-05
CTBP2P11	2.94333	1.75179	0.944908	1.85392	0.0637499
PDE5A	317.858	1.75133	0.259161	6.7577	1.40202e-11
LOC100129316	2.42041	1.75067	1.15277	1.51867	0.128847
SLC19A3	0.949749	1.75067	1.79041	0.9778	0.328173
SNORA16B	8.32743	1.74999	0.461459	3.79231	0.000149253
LOC112267985	0.309658	1.74916	3.03485	0.576359	0.564373
RPS12P26	24.4353	1.74887	0.590744	2.96046	0.00307184
LOC105376978	0.738106	1.74872	2.30746	0.757855	0.448538
LOC105377762	9.52007	1.74692	0.530723	3.29158	0.000996265
LOC105379827	25.5927	1.7466	0.318607	5.48198	4.20585e-08
RNU6-32P	2.07709	1.74602	0.785219	2.22361	0.0261745
SNORD63B	3.51993	1.74497	0.654936	2.66433	0.00771418
KRT8P20	0.31352	1.74449	3.03499	0.574793	0.565431
LOC105377146	0.438466	1.74381	2.18555	0.79788	0.42494
LOC105371874	5.06916	1.74364	1.34517	1.29623	0.194897
LOC105372156	0.308117	1.74339	3.03502	0.574424	0.565681
NR1H4	0.753049	1.74318	2.64039	0.660198	0.509127
PPIAL4A	0.313422	1.74307	2.3252	0.749643	0.45347
RN7SL627P	1.1233	1.74277	1.12062	1.55519	0.119901
WDR17	1.12649	1.74149	2.00273	0.869557	0.384542
RPSAP16	36.9899	1.74083	0.401078	4.34037	1.42244e-05
TALDO1P1	1.64836	1.74082	0.929564	1.87272	0.0611068
LOC107984583	16.7368	1.73972	0.430196	4.04401	5.25445e-05
WNT5A	2.86881	1.73945	1.58896	1.0947	0.273646
HIGD1AP17	6.91576	1.73881	0.477573	3.64094	0.000271645
PCSK9	0.306911	1.73876	3.03517	0.572871	0.566732
LOC107984785	0.580132	1.73866	2.44362	0.711509	0.476769
KCNQ1DN	0.306764	1.73837	3.03518	0.57274	0.566821
[truncated: 44,426 more rows]

## Sheet: Supplementary Data 3.
Gene_name	baseMean	log2FoldChange	lfcSE	stat	pvalue
AOC1	47.7169	8.17241	3.77495	2.16491	0.0303949
LOC105369293	3.79247	6.84701	1.98379	3.45148	0.000557517
ZNF385D-AS1	9.16387	6.77691	3.22656	2.10035	0.0356978
LOC105379070	4.56007	6.76022	1.74069	3.88364	0.000102905
SLC27A6	3.42635	6.69956	2.87612	2.32937	0.0198395
CSNK1E	4.79737	6.49526	3.8073	1.706	0.0880076
AKR1C2	2.56785	6.28266	2.43759	2.57741	0.00995448
LOC101928163	2.46269	6.22288	3.18002	1.95687	0.0503629
TMEM176B	7.39689	6.0594	1.53093	3.95798	7.55863e-05
C6orf118	2.08506	5.98276	2.57741	2.32123	0.0202744
LOC100129526	1.97414	5.90653	2.59387	2.27711	0.0227799
LOC107985637	1.91581	5.865	3.42539	1.71221	0.0868575
LOC112268231	1.86707	5.82634	2.65655	2.1932	0.0282932
LOC105379513	3.07912	5.81249	2.64732	2.19561	0.0281197
IGLC1	1.82025	5.78655	3.5067	1.65014	0.0989144
BHLHE41	1.82025	5.78655	3.5067	1.65014	0.0989144
LOC112268151	1.81641	5.78466	2.69211	2.14875	0.0316544
WNT5A	1.78916	5.76325	2.70234	2.13269	0.0329501
TMC1	1.78533	5.76301	2.73902	2.10404	0.0353748
OTOGL	2.93712	5.74243	1.98929	2.88667	0.0038934
LOC107986181	1.76383	5.74165	2.74061	2.09503	0.0361687
LOC107986990	1.76192	5.74153	2.71567	2.11422	0.0344962
NTS	1.73659	5.71957	2.74567	2.08313	0.0372397
LOC101928272	1.73659	5.71957	2.74567	2.08313	0.0372397
H3P13	1.71318	5.69904	3.57828	1.59268	0.111233
CNIH3-AS1	1.71126	5.69735	2.80441	2.03157	0.0421976
LOC105377382	1.70934	5.69717	2.75597	2.06721	0.0387141
LOC105370011	1.68401	5.67455	2.80186	2.02528	0.0428382
LOC105375481	2.72688	5.64089	2.04496	2.75844	0.00580775
AGBL1	2.73072	5.64055	2.0852	2.70504	0.0068296
G6PC	1.60418	5.60419	2.87035	1.95245	0.0508853
CTXN2	2.63937	5.59362	2.73395	2.04598	0.040758
ENPP1	1.57502	5.57977	2.84207	1.96327	0.0496146
MPDZ	3.31569	5.56821	2.01148	2.76822	0.00563636
LINC01981	2.60582	5.56359	2.08271	2.67132	0.00755528
PDE10A	1.54777	5.55508	2.86166	1.94121	0.0522328
GARNL3	1.52244	5.53004	2.88791	1.91489	0.055506
LOC107984756	39.8096	5.51253	1.71955	3.2058	0.00134689
LOC107985138	1.49903	5.5063	3.74253	1.47128	0.141216
FABP2	1.49711	5.50461	2.94322	1.87027	0.0614462
NALCN-AS1	1.49519	5.50448	2.90334	1.89591	0.0579714
LOC107986018	1.46986	5.47855	2.94643	1.85939	0.0629722
SLC36A3	3.09878	5.46327	2.13546	2.55836	0.0105167
DMP1	1.44453	5.4523	3.04281	1.79186	0.0731552
LOC440040	1.44453	5.4523	3.04281	1.79186	0.0731552
ZBTB7C	1.44261	5.45204	2.95585	1.84449	0.0651116
LOC101927536	1.44261	5.45204	2.95585	1.84449	0.0651116
LOC105378516	1.44069	5.45198	2.94642	1.85037	0.0642595
LOC102724715	2.41604	5.4496	2.8266	1.92797	0.0538588
LOC105370807	25.2944	5.44849	1.35516	4.02055	5.80625e-05
ZSCAN4	1.41729	5.42521	3.02617	1.79276	0.0730108
RPL5P32	1.41729	5.42521	3.02617	1.79276	0.0730108
CASC15	1.41537	5.42505	2.97056	1.82627	0.0678093
LOC107986666	1.41537	5.42505	2.97056	1.82627	0.0678093
GRIN2A	1.41345	5.425	2.97472	1.8237	0.0681973
LOC105377982	1.41345	5.425	2.97472	1.8237	0.0681973
LRFN2	1.41153	5.4248	3.04448	1.78184	0.0747745
RPL15P2	1.39196	5.3993	3.82014	1.41338	0.157545
C3orf85	1.39004	5.39765	3.02429	1.78476	0.0742995
MPP3	1.38812	5.39755	2.98982	1.80531	0.0710265
PLEKHH2	1.38812	5.39755	2.98982	1.80531	0.0710265
LOC401478	1.38812	5.39755	2.98982	1.80531	0.0710265
FGB	1.3862	5.39749	3.00907	1.79374	0.0728549
PDE11A	1.3862	5.39749	3.00907	1.79374	0.0728549
GRM7	2.90617	5.37928	2.21508	2.42848	0.0151621
SLCO1B1	1.36279	5.36958	3.0311	1.77149	0.0764786
NINL	1.36087	5.36953	3.01362	1.78175	0.0747894
SLC15A1	1.35895	5.36943	3.05167	1.75951	0.0784917
LINC01868	1.35895	5.36943	3.05167	1.75951	0.0784917
LONRF2	1.33362	5.34094	3.04235	1.75553	0.0791679
CDHR3	1.31021	5.31194	3.11303	1.70636	0.0879414
LINC01122	1.30829	5.31182	3.06316	1.7341	0.0829009
LRRC7-AS1	1.30829	5.31182	3.06316	1.7341	0.0829009
LOC105369667	2.77564	5.28978	2.1586	2.45056	0.0142636
TOX3	2.16889	5.2848	2.22661	2.37347	0.017622
LOC107986635	1.67743	5.28373	2.38886	2.21182	0.0269792
IGLV1-47	1.28488	5.28361	3.82167	1.38254	0.166806
ZNF519	1.28488	5.28361	3.82167	1.38254	0.166806
EVADR	1.28296	5.28212	3.11519	1.6956	0.0899617
EPGN	1.28104	5.28207	3.08709	1.71102	0.0870778
LOC101926960	1.28104	5.28207	3.08709	1.71102	0.0870778
F11	1.27912	5.282	3.12065	1.69259	0.0905328
GRM6	1.27912	5.282	3.12065	1.69259	0.0905328
BPESC1	1.25572	5.25171	3.12589	1.68007	0.0929441
LINC00924	1.25572	5.25171	3.12589	1.68007	0.0929441
LOC102724903	1.25572	5.25171	3.12589	1.68007	0.0929441
CTB-3M24.3	2.10778	5.22626	2.26706	2.30531	0.0211495
LOC105369618	2.13443	5.22585	2.24029	2.33267	0.0196655
SLC44A5	1.22847	5.22067	3.14397	1.66053	0.0968077
LOC105374492	1.22655	5.22065	3.15175	1.65643	0.0976348
EGF	2.63027	5.21088	2.22222	2.3449	0.0190323
RBP1	1.20314	5.18902	3.21106	1.61598	0.106098
LINC01148	1.20314	5.18902	3.21106	1.61598	0.106098
LOC105375886	1.20122	5.18895	3.16792	1.63797	0.101428
LOC107987083	1.20122	5.18895	3.16792	1.63797	0.101428
COBLL1	2.07993	5.18548	2.2683	2.28607	0.0222503
TSLP	1.17781	5.15784	3.82347	1.34899	0.177339
MFF-DT	1.17781	5.15784	3.82347	1.34899	0.177339
LOC105372316	1.17781	5.15784	3.82347	1.34899	0.177339
LOC105374920	1.17781	5.15784	3.82347	1.34899	0.177339
MOCOS	1.17589	5.15655	3.21791	1.60245	0.109055
ZSWIM5P2	1.17589	5.15655	3.21791	1.60245	0.109055
LINC02164	1.17589	5.15655	3.21791	1.60245	0.109055
LOC105377981	1.17589	5.15655	3.21791	1.60245	0.109055
VTCN1	1.17397	5.15653	3.19769	1.61258	0.106836
SH3BGRL2	1.17397	5.15653	3.19769	1.61258	0.106836
MCHR2	1.17397	5.15653	3.19769	1.61258	0.106836
LOC100533853	1.17397	5.15653	3.19769	1.61258	0.106836
ZNF618	1.99823	5.143	2.3074	2.22891	0.0258197
NEUROD1	3.23304	5.12502	2.23567	2.29239	0.0218833
LINC00488	1.14672	5.12337	3.23403	1.58421	0.113147
LOC105373559	1.14672	5.12337	3.23403	1.58421	0.113147
EYA4	1.14864	5.12336	3.23383	1.5843	0.113125
LOC105369576	1.14864	5.12336	3.23383	1.5843	0.113125
LOC105370852	1.14864	5.12336	3.23383	1.5843	0.113125
LINC01808	1.14864	5.12336	3.23383	1.5843	0.113125
LOC105373828	1.95666	5.12175	2.31845	2.20913	0.0271655
PLIN2	1622.96	5.11431	1.38836	3.68371	0.000229859
ENO4	1.93614	5.10069	2.33313	2.1862	0.0288013
KANK4	1.12139	5.08941	3.25752	1.56236	0.118203
LOC105373261	1.12139	5.08941	3.25752	1.56236	0.118203
LOC105374594	1.12139	5.08941	3.25752	1.56236	0.118203
LOC107984694	1.12139	5.08941	3.25752	1.56236	0.118203
LOC112267900	2.48033	5.07527	2.22839	2.27755	0.0227533
OSBPL10	1.09606	5.05466	3.32287	1.52117	0.128216
LINC00958	1.09606	5.05466	3.32287	1.52117	0.128216
LINC01087	1.09606	5.05466	3.32287	1.52117	0.128216
FAM24B-CUZD1	1.09415	5.05465	3.28784	1.53738	0.124201
LOC105378360	1.09415	5.05465	3.28784	1.53738	0.124201
LOC105375566	13.4626	5.04337	1.3031	3.87029	0.000108708
FGF14	6.07251	5.04284	1.75734	2.86958	0.00411016
PRR16	4.29777	5.02335	1.89547	2.65018	0.00804486
PRSS3	1.07074	5.02004	3.82564	1.31221	0.18945
LINC00254	1.07074	5.02004	3.82564	1.31221	0.18945
LOC339593	1.07074	5.02004	3.82564	1.31221	0.18945
LOC105377724	1.07074	5.02004	3.82564	1.31221	0.18945
TIMP3	1.0669	5.01904	3.32526	1.50937	0.131205
ANKRD33	1.06882	5.019	3.33495	1.50497	0.132332
TMPRSS11F	1.06882	5.019	3.33495	1.50497	0.132332
LOC100421580	1.06882	5.019	3.33495	1.50497	0.132332
LOC100505918	1.06882	5.019	3.33495	1.50497	0.132332
LOC105372174	1.8677	5.01007	2.35494	2.12748	0.0333805
MAS1	3.67799	4.99618	1.82105	2.74358	0.00607741
NDNF	2.96761	4.99525	1.9276	2.59143	0.00955773
LOC101928733	1.03965	4.98252	3.37163	1.47778	0.139467
NPY5R	1.04157	4.98247	3.35777	1.48387	0.137845
LINC02290	1.04157	4.98247	3.35777	1.48387	0.137845
LOC105377115	1.04157	4.98247	3.35777	1.48387	0.137845
LOC105378557	1.04157	4.98247	3.35777	1.48387	0.137845
VWA5B1	1.03773	4.98154	3.82628	1.30193	0.192941
PTGFR	2.90859	4.96616	1.86848	2.65786	0.00786389
LOC107986989	2.86534	4.96514	2.28955	2.16861	0.0301126
LOC105371840	1.78792	4.96368	3.08	1.61158	0.107052
CSRP3-AS1	1.77168	4.96205	2.45383	2.02217	0.0431592
NPY4R	1.01624	4.94504	3.44747	1.4344	0.151459
LOC100129340	1.01432	4.94502	3.38854	1.45934	0.144473
LOC105374191	1.75683	4.93843	2.4092	2.04982	0.040382
MPPED2	1.76315	4.93843	2.40612	2.05244	0.0401267
LOC107986178	1.78788	4.93843	2.39422	2.06264	0.0391467
SYNPR	2.83301	4.93342	1.97655	2.49598	0.012561
LOC105369965	1.75871	4.9146	2.43593	2.01755	0.0436385
LOC105377732	1.76255	4.91329	2.42448	2.02654	0.0427098
EN2	0.987072	4.90657	3.42723	1.43164	0.152246
A2ML1	0.987072	4.90657	3.42723	1.43164	0.152246
WDR72	0.987072	4.90657	3.42723	1.43164	0.152246
HSPD1P8	0.987072	4.90657	3.42723	1.43164	0.152246
LOC101929974	0.987072	4.90657	3.42723	1.43164	0.152246
GDI2P1	0.988991	4.9065	3.45076	1.42186	0.155066
LOC105379050	0.988991	4.9065	3.45076	1.42186	0.155066
HOXB5	0.963662	4.86768	3.82829	1.2715	0.20355
ZNF471	0.963662	4.86768	3.82829	1.2715	0.20355
BRINP2	0.963662	4.86768	3.82829	1.2715	0.20355
LINC01226	0.963662	4.86768	3.82829	1.2715	0.20355
LOC101928084	0.963662	4.86768	3.82829	1.2715	0.20355
LOC102724234	0.963662	4.86768	3.82829	1.2715	0.20355
LOC105372106	0.963662	4.86768	3.82829	1.2715	0.20355
LOC105372204	0.963662	4.86768	3.82829	1.2715	0.20355
LOC105372319	0.963662	4.86768	3.82829	1.2715	0.20355
LOC105374639	0.963662	4.86768	3.82829	1.2715	0.20355
LOC105375875	0.963662	4.86768	3.82829	1.2715	0.20355
COLCA2	0.959823	4.86706	3.47539	1.40044	0.161383
LOC107984390	0.959823	4.86706	3.47539	1.40044	0.161383
CLCA4	0.961743	4.86697	3.47134	1.40204	0.160903
SSUH2	0.961743	4.86697	3.47134	1.40204	0.160903
LOC105372969	0.961743	4.86697	3.47134	1.40204	0.160903
LOC105375749	0.961743	4.86697	3.47134	1.40204	0.160903
LOC105376957	0.961743	4.86697	3.47134	1.40204	0.160903
LOC105377991	0.961743	4.86697	3.47134	1.40204	0.160903
SPATA31D5P	0.957904	4.86634	3.82831	1.27114	0.203677
LOC107986217	0.957904	4.86634	3.82831	1.27114	0.203677
ENOX1	3.78733	4.86453	2.22884	2.18254	0.0290698
LOC107984684	2.18828	4.86446	2.32907	2.08859	0.0367451
LOC105373451	1.65998	4.86305	2.46164	1.97553	0.0482079
LRRC9	2.16295	4.84347	2.35584	2.05594	0.0397887
LOC654780	16.8537	4.83846	3.71493	1.30244	0.192767
ADAM7	1.64792	4.83652	2.64834	1.82625	0.0678129
LOC101928362	1.27188	4.83635	3.36652	1.4366	0.15083
GFRA1	1.2804	4.83614	2.64207	1.83044	0.0671842
WNT9B	0.934495	4.82635	3.50218	1.3781	0.168173
HERC2P4	0.934495	4.82635	3.50218	1.3781	0.168173
LOC101269108	0.934495	4.82635	3.50218	1.3781	0.168173
SDAD1-AS1	0.934495	4.82635	3.50218	1.3781	0.168173
LOC107984792	0.934495	4.82635	3.50218	1.3781	0.168173
LOC107986317	0.934495	4.82635	3.50218	1.3781	0.168173
SOX5	2.10246	4.82393	3.01874	1.59799	0.110044
LOC107984581	2.09706	4.82299	2.00663	2.40353	0.0162378
LOC112268075	2.07911	4.82276	2.60254	1.8531	0.0638679
ANO5	1.65355	4.81101	2.46562	1.95124	0.0510286
LOC102723985	1.62883	4.81101	2.47776	1.94168	0.0521761
MYT1L	1.65547	4.81022	2.47614	1.94263	0.0520611
NXPE1	1.25123	4.80406	2.79446	1.71914	0.0855895
LOC105378796	4.64289	4.79674	1.57227	3.05084	0.00228201
LOC107984755	469.563	4.78732	0.849446	5.63581	1.74235e-08
CAV1	0.907246	4.78457	3.54228	1.3507	0.176791
DYDC1	0.907246	4.78457	3.54228	1.3507	0.176791
APCDD1L-DT	0.907246	4.78457	3.54228	1.3507	0.176791
LINC01102	0.907246	4.78457	3.54228	1.3507	0.176791
CSTF3-DT	0.907246	4.78457	3.54228	1.3507	0.176791
PRKG2-AS1	0.907246	4.78457	3.54228	1.3507	0.176791
LOC107984733	0.907246	4.78457	3.54228	1.3507	0.176791
LOC100113374	0.909166	4.78449	3.58903	1.33309	0.182503
LOC105369842	0.909166	4.78449	3.58903	1.33309	0.182503
LOC107985591	0.909166	4.78449	3.58903	1.33309	0.182503
LOC105374821	1.62822	4.78346	2.48211	1.92718	0.0539575
SOCS5P1	1.22782	4.76851	2.68539	1.77573	0.0757782
ZNF704	3.66367	4.76275	1.60938	2.95936	0.00308281
EPHA5	3.19712	4.76022	1.90377	2.50042	0.0124047
SLC12A1	164.353	4.75822	0.881438	5.39824	6.72968e-08
LOC112268066	1.59906	4.75705	2.51387	1.89232	0.0584478
LOC100505796	1.55753	4.75551	2.55681	1.85994	0.0628942
ZNF806	1.6029	4.75544	2.53179	1.8783	0.0603407
MARK1	0.879998	4.74154	3.59268	1.31978	0.186909
PKP1	0.879998	4.74154	3.59268	1.31978	0.186909
LINC01559	0.879998	4.74154	3.59268	1.31978	0.186909
LOC105377571	0.879998	4.74154	3.59268	1.31978	0.186909
HTR1D	0.878079	4.74113	3.83071	1.23767	0.21584
CTTNBP2	0.878079	4.74113	3.83071	1.23767	0.21584
LINC00691	0.878079	4.74113	3.83071	1.23767	0.21584
CFAP221	0.878079	4.74113	3.83071	1.23767	0.21584
BIVM-ERCC5	0.878079	4.74113	3.83071	1.23767	0.21584
LOC105372719	0.878079	4.74113	3.83071	1.23767	0.21584
LOC107984361	1.94443	4.73642	3.08705	1.53429	0.124959
LOC100505498	2.02671	4.73548	2.39209	1.97964	0.0477439
TMEM108	1.17315	4.73296	2.77151	1.70772	0.0876892
DLG2-AS2	2.00138	4.71243	2.40297	1.96108	0.0498692
CCDC190	1.91526	4.71213	2.47245	1.90586	0.056669
LAMC2	1.52986	4.70016	2.53944	1.85087	0.0641886
CFAP97D2	1.50976	4.70015	2.55126	1.84228	0.0654336
LOC105369873	1.50962	4.70015	2.55134	1.84222	0.0654424
LOC107984376	1.50304	4.69927	2.55929	1.83616	0.0663339
LOC105376147	1.5484	4.69924	2.5334	1.85491	0.0636084
PABPC1P8	1.15121	4.69758	2.76865	1.69671	0.0897521
AQP4	0.856588	4.6973	3.8316	1.22594	0.220222
GRK4	0.856588	4.6973	3.8316	1.22594	0.220222
OXT	0.856588	4.6973	3.8316	1.22594	0.220222
DDO	0.856588	4.6973	3.8316	1.22594	0.220222
CBLN2	0.856588	4.6973	3.8316	1.22594	0.220222
LINC01252	0.856588	4.6973	3.8316	1.22594	0.220222
SLC22A10	0.856588	4.6973	3.8316	1.22594	0.220222
SAR1AP1	0.856588	4.6973	3.8316	1.22594	0.220222
ESRG	0.856588	4.6973	3.8316	1.22594	0.220222
LOC105370163	0.856588	4.6973	3.8316	1.22594	0.220222
LOC105374265	0.856588	4.6973	3.8316	1.22594	0.220222
LOC105376010	0.856588	4.6973	3.8316	1.22594	0.220222
LOC105376361	0.856588	4.6973	3.8316	1.22594	0.220222
LOC105379230	0.856588	4.6973	3.8316	1.22594	0.220222
LOC107984120	0.856588	4.6973	3.8316	1.22594	0.220222
LOC101927329	0.85275	4.69718	3.6584	1.28395	0.199161
BVES	0.854669	4.69702	3.63213	1.29319	0.195947
ZNF114	0.854669	4.69702	3.63213	1.29319	0.195947
TMEM200C	0.854669	4.69702	3.63213	1.29319	0.195947
CALML3-AS1	0.854669	4.69702	3.63213	1.29319	0.195947
LOC105373324	0.854669	4.69702	3.63213	1.29319	0.195947
LOC105374581	0.854669	4.69702	3.63213	1.29319	0.195947
LOC105375284	0.854669	4.69702	3.63213	1.29319	0.195947
LOC105375754	0.854669	4.69702	3.63213	1.29319	0.195947
CACNA1C-IT1	0.854669	4.69702	3.63213	1.29319	0.195947
LOC107987339	0.854669	4.69702	3.63213	1.29319	0.195947
FREM1	2.47781	4.69582	1.97128	2.38211	0.0172136
LOC105375079	2.42005	4.69558	2.3975	1.95853	0.0501675
LOC107986108	1.51923	4.6713	2.55758	1.82645	0.0677822
MYO18B	1.48443	4.67036	2.56436	1.82126	0.0685679
FYB2	1.50645	4.66957	2.60757	1.79077	0.07333
LOC102724858	1.52307	4.66954	2.59794	1.7974	0.0722717
LOC112267989	1.88076	4.66571	2.46368	1.8938	0.0582522
MYH1	0.827421	4.65127	3.67362	1.26613	0.205467
XRCC6P1	0.827421	4.65127	3.67362	1.26613	0.205467
RPL10AP11	0.827421	4.65127	3.67362	1.26613	0.205467
LOC100507560	0.827421	4.65127	3.67362	1.26613	0.205467
LOC105374490	0.827421	4.65127	3.67362	1.26613	0.205467
C5orf17	0.82934	4.65124	3.77244	1.23295	0.217593
KRT18P18	1.86383	4.6415	2.09395	2.21662	0.026649
MINAR1	1.4447	4.64037	3.26227	1.42244	0.154899
PMCHL2	2.42711	4.63912	2.39477	1.93719	0.0527226
EEF1A1P17	1.09615	4.62564	2.84838	1.62395	0.104386
SLC9C2	1.89622	4.61736	2.47764	1.86361	0.0623766
ACTN2	1.45003	4.61081	2.58782	1.78174	0.0747921
MYH2	0.800173	4.60404	3.72679	1.23539	0.216685
LOC101928819	0.800173	4.60404	3.72679	1.23539	0.216685
LOC101929577	0.800173	4.60404	3.72679	1.23539	0.216685
LOC102723831	0.800173	4.60404	3.72679	1.23539	0.216685
LOC105372672	0.800173	4.60404	3.72679	1.23539	0.216685
LOC105375409	0.800173	4.60404	3.72679	1.23539	0.216685
CALCRL	0.798254	4.60402	3.83358	1.20097	0.229762
FBXL7	0.798254	4.60402	3.83358	1.20097	0.229762
PLXNA4	0.798254	4.60402	3.83358	1.20097	0.229762
PRDM6	0.798254	4.60402	3.83358	1.20097	0.229762
OR5M10	0.798254	4.60402	3.83358	1.20097	0.229762
HERC2P11	0.798254	4.60402	3.83358	1.20097	0.229762
LOC105369322	0.798254	4.60402	3.83358	1.20097	0.229762
LOC105369487	0.798254	4.60402	3.83358	1.20097	0.229762
LOC105374200	0.798254	4.60402	3.83358	1.20097	0.229762
LOC105377043	0.798254	4.60402	3.83358	1.20097	0.229762
TRPC6	0.802092	4.60384	3.76045	1.22428	0.220847
KRT8P30	0.802092	4.60384	3.76045	1.22428	0.220847
MMP16	4.23188	4.60044	1.92686	2.38753	0.016962
LOC105369833	1.82997	4.59335	2.47566	1.85541	0.0635381
NPAP1	1.08306	4.5848	2.84746	1.61014	0.107368
LINC01180	1.39404	4.58007	2.63342	1.73921	0.0819983
HNRNPA1P6	1.44325	4.57821	2.67945	1.70864	0.0875178
LOC105376192	1.83981	4.56845	2.47573	1.8453	0.0649946
FBXL21P	0.772925	4.5552	3.79565	1.20011	0.230097
TDRP	0.772925	4.5552	3.79565	1.20011	0.230097
LOC105376017	0.772925	4.5552	3.79565	1.20011	0.230097
DCT	0.774844	4.55494	3.78352	1.20389	0.228631
GPC3	0.774844	4.55494	3.78352	1.20389	0.228631
PGF	0.774844	4.55494	3.78352	1.20389	0.228631
ELOVL4	0.774844	4.55494	3.78352	1.20389	0.228631
IGHV7-56	0.774844	4.55494	3.78352	1.20389	0.228631
DDX59-AS1	0.774844	4.55494	3.78352	1.20389	0.228631
LOC105372125	0.774844	4.55494	3.78352	1.20389	0.228631
LOC105374122	0.774844	4.55494	3.78352	1.20389	0.228631
ST13P1	1.04549	4.54565	2.86433	1.58698	0.112516
LOC105370921	1.81448	4.54247	2.48581	1.82736	0.0676456
COL8A1	2.29663	4.53927	2.46598	1.84076	0.065657
LOC646588	2.2713	4.51845	2.52738	1.7878	0.0738079
LOC105375161	2.21604	4.51827	2.05158	2.20233	0.0276418
GLRA3	1.3453	4.51574	3.35734	1.34503	0.178614
LOC105372200	1.38683	4.51555	2.62953	1.71725	0.0859339
OR8K1	1.73238	4.51445	2.32903	1.93834	0.052582
LOC107984757	396.2	4.51147	0.928988	4.85633	1.19582e-06
KDR	0.747596	4.50438	3.82578	1.17738	0.239046
TBX5	0.747596	4.50438	3.82578	1.17738	0.239046
CCDC198	0.747596	4.50438	3.82578	1.17738	0.239046
CFHR5	0.747596	4.50438	3.82578	1.17738	0.239046
XIRP2	0.747596	4.50438	3.82578	1.17738	0.239046
UBE2U	0.747596	4.50438	3.82578	1.17738	0.239046
NLRP14	0.747596	4.50438	3.82578	1.17738	0.239046
LINC01630	0.747596	4.50438	3.82578	1.17738	0.239046
CNTNAP2-AS1	0.747596	4.50438	3.82578	1.17738	0.239046
LINC02204	0.747596	4.50438	3.82578	1.17738	0.239046
LOC102724227	0.747596	4.50438	3.82578	1.17738	0.239046
LOC105369561	0.747596	4.50438	3.82578	1.17738	0.239046
LINC02472	0.747596	4.50438	3.82578	1.17738	0.239046
LOC105378576	0.747596	4.50438	3.82578	1.17738	0.239046
CDH8	0.749515	4.50408	3.83585	1.17421	0.240312
GABRA1	0.749515	4.50408	3.83585	1.17421	0.240312
PCDHA11	0.749515	4.50408	3.83585	1.17421	0.240312
GREM2	0.749515	4.50408	3.83585	1.17421	0.240312
BEST3	0.749515	4.50408	3.83585	1.17421	0.240312
LURAP1L	0.749515	4.50408	3.83585	1.17421	0.240312
LOC400867	0.749515	4.50408	3.83585	1.17421	0.240312
RPSAP49	0.749515	4.50408	3.83585	1.17421	0.240312
ZNF727	0.749515	4.50408	3.83585	1.17421	0.240312
TBCAP2	0.749515	4.50408	3.83585	1.17421	0.240312
LINC02871	0.749515	4.50408	3.83585	1.17421	0.240312
LINC00507	0.749515	4.50408	3.83585	1.17421	0.240312
PRKCA-AS1	0.749515	4.50408	3.83585	1.17421	0.240312
LOC101928882	0.749515	4.50408	3.83585	1.17421	0.240312
LOC101929048	0.749515	4.50408	3.83585	1.17421	0.240312
LOC102723395	0.749515	4.50408	3.83585	1.17421	0.240312
LOC105369400	0.749515	4.50408	3.83585	1.17421	0.240312
LOC105369905	0.749515	4.50408	3.83585	1.17421	0.240312
LOC105372592	0.749515	4.50408	3.83585	1.17421	0.240312
SYN3-AS1	0.749515	4.50408	3.83585	1.17421	0.240312
LOC105373293	0.749515	4.50408	3.83585	1.17421	0.240312
LOC105374975	0.749515	4.50408	3.83585	1.17421	0.240312
LOC105376161	0.749515	4.50408	3.83585	1.17421	0.240312
LINC02642	0.749515	4.50408	3.83585	1.17421	0.240312
LOC105376496	0.749515	4.50408	3.83585	1.17421	0.240312
LOC112267961	0.749515	4.50408	3.83585	1.17421	0.240312
LOC105375971	1.72482	4.48973	2.53994	1.76765	0.077119
ECM2	1.73697	4.48972	2.53532	1.77087	0.0765826
CACNA2D1	7.23059	4.48736	1.69165	2.65265	0.00798633
MRGPRE	2.56021	4.48422	3.01957	1.48505	0.13753
ADAMTS3	1.30089	4.4827	2.69826	1.66133	0.0966473
TNR	2.87154	4.48265	2.47952	1.80787	0.070627
LOC100533635	1.30281	4.48157	2.69903	1.66044	0.096826
LOC105374943	1.3615	4.48151	2.65776	1.6862	0.0917576
PTPRB	2.16952	4.47636	2.05055	2.18301	0.0290353
CDH12	3.01633	4.46481	2.39108	1.86728	0.0618625
C2orf27A	0.990994	4.46412	2.91101	1.53353	0.125146
LOC101928570	1.73465	4.46291	2.52816	1.76528	0.0775171
LOC102724745	2.11391	4.45452	2.46882	1.80431	0.0711831
KRT8P21	0.718428	4.45249	3.83708	1.16038	0.245892
MGAT4D	0.718428	4.45249	3.83708	1.16038	0.245892
POM121L4P	0.718428	4.45249	3.83708	1.16038	0.245892
SERBP1P3	0.718428	4.45249	3.83708	1.16038	0.245892
BMS1P16	0.718428	4.45249	3.83708	1.16038	0.245892
OSBPL9P6	0.718428	4.45249	3.83708	1.16038	0.245892
LINC01885	0.718428	4.45249	3.83708	1.16038	0.245892
LOC105377483	0.718428	4.45249	3.83708	1.16038	0.245892
LOC107985441	0.718428	4.45249	3.83708	1.16038	0.245892
LINC01833	0.718428	4.45249	3.83708	1.16038	0.245892
LPL	0.720347	4.45203	3.83709	1.16026	0.245943
TRIM48	0.720347	4.45203	3.83709	1.16026	0.245943
DACT2	0.720347	4.45203	3.83709	1.16026	0.245943
TENT5D	0.720347	4.45203	3.83709	1.16026	0.245943
TCTEX1D1	0.720347	4.45203	3.83709	1.16026	0.245943
LOC344967	0.720347	4.45203	3.83709	1.16026	0.245943
LOC100506675	0.720347	4.45203	3.83709	1.16026	0.245943
LOC102724419	0.720347	4.45203	3.83709	1.16026	0.245943
LOC105369452	0.720347	4.45203	3.83709	1.16026	0.245943
LOC105371351	0.720347	4.45203	3.83709	1.16026	0.245943
LOC105374040	0.720347	4.45203	3.83709	1.16026	0.245943
LOC105374666	0.720347	4.45203	3.83709	1.16026	0.245943
LOC107984496	0.720347	4.45203	3.83709	1.16026	0.245943
LOC107986948	0.720347	4.45203	3.83709	1.16026	0.245943
LOC107987113	0.720347	4.45203	3.83709	1.16026	0.245943
LOC107987178	0.720347	4.45203	3.83709	1.16026	0.245943
LOC112267914	0.720347	4.45203	3.83709	1.16026	0.245943
LOC112268424	0.720347	4.45203	3.83709	1.16026	0.245943
LOC105370481	0.722267	4.45156	3.83711	1.16014	0.245994
IGHG2	1.65595	4.43648	3.23113	1.37304	0.169739
MGAT4EP	1.65595	4.43648	3.23113	1.37304	0.169739
LOC105376313	1.67416	4.43645	3.22025	1.37767	0.168305
LDB3	1.70741	4.43564	2.53957	1.74661	0.0807052
LOC112267905	443.815	4.43297	0.896589	4.94426	7.64328e-07
ATRNL1	3.82316	4.42674	1.9613	2.25705	0.0240052
RPL19P13	0.986428	4.42162	2.92583	1.51123	0.130729
TMEM63C	4.92297	4.42023	1.99439	2.21633	0.0266686
HSPE1P17	0.988347	4.41973	2.93875	1.50395	0.132595
LOC107985174	1.307	4.41353	2.68779	1.64207	0.100576
LOC100652813	1.25023	4.41236	2.7705	1.59262	0.111245
PRELP	1.61019	4.40847	2.62607	1.67873	0.0932041
LOC107984758	31.6093	4.40824	1.19926	3.67579	0.000237113
C4orf54	1.68016	4.40785	2.55362	1.72612	0.0843262
LOC107984398	1.62679	4.40714	2.59923	1.69556	0.0899701
ROBO4	0.693099	4.39779	3.83844	1.14572	0.251909
MEGF10	0.693099	4.39779	3.83844	1.14572	0.251909
RSPO1	0.693099	4.39779	3.83844	1.14572	0.251909
LINC01446	0.693099	4.39779	3.83844	1.14572	0.251909
NACAP10	0.693099	4.39779	3.83844	1.14572	0.251909
LINC01134	0.693099	4.39779	3.83844	1.14572	0.251909
LOC105370849	0.693099	4.39779	3.83844	1.14572	0.251909
LOC105375953	0.693099	4.39779	3.83844	1.14572	0.251909
LOC107984256	0.693099	4.39779	3.83844	1.14572	0.251909
TBC1D9	0.695018	4.39714	3.83846	1.14555	0.251981
HSPA8P14	0.695018	4.39714	3.83846	1.14555	0.251981
ATP5MC1P7	0.695018	4.39714	3.83846	1.14555	0.251981
LOC101929413	0.695018	4.39714	3.83846	1.14555	0.251981
LOC105375382	0.695018	4.39714	3.83846	1.14555	0.251981
LOC107985920	0.695018	4.39714	3.83846	1.14555	0.251981
POTEB3	2.08746	4.38869	2.1326	2.05791	0.0395988
ANKRD18CP	1.58919	4.38	2.21218	1.97995	0.0477096
MFSD4A-AS1	1.27976	4.37833	2.71373	1.6134	0.106658
ITGA8	1.25503	4.37831	2.73236	1.60239	0.109069
LOC105370114	1.22107	4.37828	2.75878	1.58704	0.112504
MUC17	1.25063	4.37695	2.74931	1.59202	0.111381
LOC100506578	1.98983	4.36429	2.51654	1.73424	0.0828752
LOC105373821	2.00904	4.36399	2.52943	1.72529	0.0844759
S1PR3	5.07837	4.36299	3.77394	1.15608	0.247647
WDR17	1.57058	4.35058	2.62674	1.65627	0.0976671
LOC105378685	1.6295	4.34905	2.63503	1.65047	0.0988459
LINC01297-DUXAP10-NBEAP6	2.85844	4.34349	1.73639	2.50145	0.0123687
LOC105376942	1.25251	4.34224	2.74905	1.57954	0.114211
LOC105376980	1.25059	4.34127	3.41142	1.27257	0.203171
LOC105374524	2.36911	4.34102	2.07463	2.09243	0.0363998
SCIMP	1.21757	4.34078	2.76336	1.57084	0.116221
LOC105370804	1.22339	4.34077	2.75874	1.57346	0.115612
MYH15	1.22971	4.34077	2.75377	1.5763	0.114957
FGF14-IT1	1.22971	4.34077	2.75377	1.5763	0.114957
LOC112268257	1.25443	4.34075	2.73464	1.58732	0.11244
C7	0.66777	4.34069	3.83991	1.13041	0.258302
EPHA7	0.66777	4.34069	3.83991	1.13041	0.258302
CCL16	0.66777	4.34069	3.83991	1.13041	0.258302
RPSAP3	0.66777	4.34069	3.83991	1.13041	0.258302
BTBD7P1	0.66777	4.34069	3.83991	1.13041	0.258302
HDAC1P2	0.66777	4.34069	3.83991	1.13041	0.258302
KANK1P1	0.66777	4.34069	3.83991	1.13041	0.258302
LOC101929322	0.66777	4.34069	3.83991	1.13041	0.258302
LOC105371191	0.66777	4.34069	3.83991	1.13041	0.258302
LOC105372424	0.66777	4.34069	3.83991	1.13041	0.258302
TMEM40	2.00771	4.34035	2.58523	1.6789	0.0931713
PNPLA10P	0.91542	4.33062	2.99962	1.44372	0.148817
E2F2	6.00169	4.32234	2.10729	2.05113	0.0402541
NOL4	1.59841	4.32113	2.63018	1.6429	0.100404
EXOGP1	1.53037	4.32104	2.66691	1.62024	0.10518
OVCH2	1.54888	4.32086	3.29465	1.31148	0.189697
VSX1	1.60417	4.32077	3.25895	1.32582	0.184901
LOC105377056	1.56325	4.32029	2.61805	1.6502	0.0989029
LOC105379170	1.60225	4.31943	2.62637	1.64464	0.100044
CYP39A1	1.98183	4.31573	2.16114	1.99697	0.0458286
LOC107985244	1.22526	4.30519	2.79939	1.5379	0.124072
GUCY1B1	1.22718	4.30371	2.75151	1.56413	0.117788
C1GALT1P2	1.22718	4.30371	2.75151	1.56413	0.117788
LOC101927890	1.22718	4.30371	2.75151	1.56413	0.117788
LOC112268095	1.19238	4.3024	2.84639	1.51153	0.130654
LOC101929028	1.19806	4.30239	2.84186	1.51393	0.130043
CLDN8	1.21248	4.30235	2.8305	1.52	0.128511
LOC105378374	2.92957	4.29826	2.04704	2.09974	0.0357513
CAPN9	2.00073	4.29264	2.54986	1.68348	0.0922814
PTPN14	1.54374	4.29057	2.23323	1.92124	0.0547015
STK32A	1.50504	4.29016	2.6554	1.61564	0.106172
RPL7P11	0.894241	4.28395	3.03149	1.41315	0.157611
MYZAP	0.889163	4.2836	3.76452	1.13789	0.255168
EPHB2	0.638603	4.28315	3.84145	1.11498	0.264858
RGR	0.638603	4.28315	3.84145	1.11498	0.264858
XYLB	0.638603	4.28315	3.84145	1.11498	0.264858
LMCD1	0.638603	4.28315	3.84145	1.11498	0.264858
PKD1L2	0.638603	4.28315	3.84145	1.11498	0.264858
PSMC6P2	0.638603	4.28315	3.84145	1.11498	0.264858
LINC01551	0.638603	4.28315	3.84145	1.11498	0.264858
LOC389249	0.638603	4.28315	3.84145	1.11498	0.264858
LOC646120	0.638603	4.28315	3.84145	1.11498	0.264858
ARL6IP1P3	0.638603	4.28315	3.84145	1.11498	0.264858
MUC8	0.638603	4.28315	3.84145	1.11498	0.264858
VPS35P1	0.638603	4.28315	3.84145	1.11498	0.264858
LOC100431175	0.638603	4.28315	3.84145	1.11498	0.264858
MRLN	0.638603	4.28315	3.84145	1.11498	0.264858
LOC101927025	0.638603	4.28315	3.84145	1.11498	0.264858
LOC102724711	0.638603	4.28315	3.84145	1.11498	0.264858
LOC105369468	0.638603	4.28315	3.84145	1.11498	0.264858
LOC105370077	0.638603	4.28315	3.84145	1.11498	0.264858
LOC105370119	0.638603	4.28315	3.84145	1.11498	0.264858
LINC02533	0.638603	4.28315	3.84145	1.11498	0.264858
LOC107985706	0.638603	4.28315	3.84145	1.11498	0.264858
LOC107986850	0.638603	4.28315	3.84145	1.11498	0.264858
TGFB2	0.640522	4.28205	3.84149	1.11469	0.264985
UBE3AP2	0.640522	4.28205	3.84149	1.11469	0.264985
MIR1915HG	0.640522	4.28205	3.84149	1.11469	0.264985
C15orf56	0.640522	4.28205	3.84149	1.11469	0.264985
CASC6	0.640522	4.28205	3.84149	1.11469	0.264985
LOC102724153	0.640522	4.28205	3.84149	1.11469	0.264985
LOC105370586	0.640522	4.28205	3.84149	1.11469	0.264985
LOC105375855	0.640522	4.28205	3.84149	1.11469	0.264985
LOC105375874	0.640522	4.28205	3.84149	1.11469	0.264985
LOC105377369	0.640522	4.28205	3.84149	1.11469	0.264985
LOC105379377	0.640522	4.28205	3.84149	1.11469	0.264985
FABP1	0.642441	4.28093	3.84152	1.11439	0.265114
MTNR1A	0.642441	4.28093	3.84152	1.11439	0.265114
PON1	0.642441	4.28093	3.84152	1.11439	0.265114
TRPC4	0.642441	4.28093	3.84152	1.11439	0.265114
COL14A1	0.642441	4.28093	3.84152	1.11439	0.265114
CFHR3	0.642441	4.28093	3.84152	1.11439	0.265114
LILRA4	0.642441	4.28093	3.84152	1.11439	0.265114
ARMC4	0.642441	4.28093	3.84152	1.11439	0.265114
RLFP1	0.642441	4.28093	3.84152	1.11439	0.265114
GPR101	0.642441	4.28093	3.84152	1.11439	0.265114
AKR1E2	0.642441	4.28093	3.84152	1.11439	0.265114
TRIM51GP	0.642441	4.28093	3.84152	1.11439	0.265114
C1orf87	0.642441	4.28093	3.84152	1.11439	0.265114
UBE2QL1	0.642441	4.28093	3.84152	1.11439	0.265114
LINC00410	0.642441	4.28093	3.84152	1.11439	0.265114
FAM81B	0.642441	4.28093	3.84152	1.11439	0.265114
GALNTL5	0.642441	4.28093	3.84152	1.11439	0.265114
FAM71C	0.642441	4.28093	3.84152	1.11439	0.265114
PDILT	0.642441	4.28093	3.84152	1.11439	0.265114
LINC00710	0.642441	4.28093	3.84152	1.11439	0.265114
LOC286083	0.642441	4.28093	3.84152	1.11439	0.265114
LINC00632	0.642441	4.28093	3.84152	1.11439	0.265114
CES1P2	0.642441	4.28093	3.84152	1.11439	0.265114
CLEC12A-AS1	0.642441	4.28093	3.84152	1.11439	0.265114
KPNA2P2	0.642441	4.28093	3.84152	1.11439	0.265114
SNF8P1	0.642441	4.28093	3.84152	1.11439	0.265114
LINC01915	0.642441	4.28093	3.84152	1.11439	0.265114
LINC01776	0.642441	4.28093	3.84152	1.11439	0.265114
COL4A2-AS2	0.642441	4.28093	3.84152	1.11439	0.265114
CAPZA1P4	0.642441	4.28093	3.84152	1.11439	0.265114
OSBPL9P1	0.642441	4.28093	3.84152	1.11439	0.265114
THRAP3P3	0.642441	4.28093	3.84152	1.11439	0.265114
PPP1R26-AS1	0.642441	4.28093	3.84152	1.11439	0.265114
PTPRT-AS1	0.642441	4.28093	3.84152	1.11439	0.265114
LOC101927871	0.642441	4.28093	3.84152	1.11439	0.265114
LOC101927872	0.642441	4.28093	3.84152	1.11439	0.265114
LOC102724521	0.642441	4.28093	3.84152	1.11439	0.265114
LOC105369405	0.642441	4.28093	3.84152	1.11439	0.265114
LOC105369408	0.642441	4.28093	3.84152	1.11439	0.265114
LOC105370261	0.642441	4.28093	3.84152	1.11439	0.265114
LOC105371204	0.642441	4.28093	3.84152	1.11439	0.265114
LOC105371600	0.642441	4.28093	3.84152	1.11439	0.265114
LOC105371723	0.642441	4.28093	3.84152	1.11439	0.265114
LOC105371833	0.642441	4.28093	3.84152	1.11439	0.265114
LOC105372546	0.642441	4.28093	3.84152	1.11439	0.265114
LINC01889	0.642441	4.28093	3.84152	1.11439	0.265114
LOC105375091	0.642441	4.28093	3.84152	1.11439	0.265114
LOC105376101	0.642441	4.28093	3.84152	1.11439	0.265114
LOC105376126	0.642441	4.28093	3.84152	1.11439	0.265114
LOC105376635	0.642441	4.28093	3.84152	1.11439	0.265114
LOC105377003	0.642441	4.28093	3.84152	1.11439	0.265114
LOC107985263	0.642441	4.28093	3.84152	1.11439	0.265114
LOC107986400	0.642441	4.28093	3.84152	1.11439	0.265114
LINC01863	0.642441	4.28093	3.84152	1.11439	0.265114
LOC107986742	0.642441	4.28093	3.84152	1.11439	0.265114
LOC107986777	0.642441	4.28093	3.84152	1.11439	0.265114
LOC107986907	0.642441	4.28093	3.84152	1.11439	0.265114
LOC107987259	0.642441	4.28093	3.84152	1.11439	0.265114
LINC01930	0.642441	4.28093	3.84152	1.11439	0.265114
LOC107983976	1.19993	4.26572	2.77656	1.53633	0.124457
TTC6	1.16321	4.2657	2.807	1.51967	0.128595
PDE6A	1.16307	4.2657	2.80712	1.5196	0.128611
LOC105372263	1.14124	4.26569	2.82584	1.50953	0.131163
C14orf132	1.20185	4.2641	2.80508	1.52013	0.128478
LCA5	1.49054	4.25941	2.67281	1.59361	0.111024
LOC105376626	3.19488	4.25678	1.87247	2.27334	0.0230054
LAMB4	1.84885	4.25165	2.19505	1.93692	0.0527545
GALR1	2.84772	4.24446	2.08938	2.03144	0.04221
SHC3	1.8804	4.24266	2.15151	1.97194	0.0486163
UQCRC2P1	0.881273	4.23339	3.05981	1.38355	0.166497
LOC105376442	3.42403	4.22909	2.01761	2.09609	0.036074
GABRR1	1.17268	4.22671	2.81157	1.50333	0.132755
LOC107984606	1.17268	4.22671	2.81157	1.50333	0.132755
KIF5A	1.45438	4.22621	2.72866	1.54882	0.121424
MARCHF10	1.17076	4.22594	3.48399	1.21296	0.225145
LOC105378512	1.14604	4.22588	3.5091	1.20426	0.228489
SH3PXD2B	1.1339	4.22585	3.52171	1.19994	0.230163
ZYG11A	1.1518	4.22582	3.52446	1.199	0.230529
LOC101927811	1.17652	4.22575	3.49966	1.20748	0.227249
TSPAN15	1.12653	4.22503	2.84966	1.48264	0.138169
SULT1C2	1.1746	4.22496	2.80851	1.50434	0.132494
PLD6	175.668	4.22374	0.783556	5.39048	7.02699e-08
SCN2A	3.10041	4.22368	2.05241	2.05791	0.0395989
ADCY6	0.613274	4.22105	3.84319	1.09832	0.272065
MOCS3P1	0.613274	4.22105	3.84319	1.09832	0.272065
BLID	0.613274	4.22105	3.84319	1.09832	0.272065
HNRNPA1P67	0.613274	4.22105	3.84319	1.09832	0.272065
RARS1P1	0.613274	4.22105	3.84319	1.09832	0.272065
LOC105369315	0.613274	4.22105	3.84319	1.09832	0.272065
LOC105371877	0.613274	4.22105	3.84319	1.09832	0.272065
LOC105375688	0.613274	4.22105	3.84319	1.09832	0.272065
LOC105376325	0.613274	4.22105	3.84319	1.09832	0.272065
RPP25	0.615193	4.21965	3.84323	1.09794	0.272229
LINC00841	0.615193	4.21965	3.84323	1.09794	0.272229
LOC107986944	0.615193	4.21965	3.84323	1.09794	0.272229
LOC102724351	1.87555	4.21753	2.15093	1.96079	0.0499035
LINC01793	1.88958	4.21683	2.61248	1.61411	0.106504
LOC112267904	2.34245	4.21365	2.09958	2.0069	0.0447601
AKR1C1	23.9168	4.20313	1.29329	3.24996	0.00115422
RHOBTB1	1.4971	4.19506	3.32558	1.26145	0.207145
LOC105375150	1.08866	4.18484	2.87517	1.45551	0.145529
YWHAZP1	1.14735	4.1848	2.82275	1.48253	0.138201
LINC01811	1.14735	4.1848	2.82275	1.48253	0.138201
LOC105378612	1.14735	4.1848	2.82275	1.48253	0.138201
POU2AF1	0.840424	4.18349	3.83585	1.09063	0.275436
LOC105374997	2.59283	4.16541	2.13487	1.95113	0.0510416
NGF	1.79105	4.16538	2.64483	1.57492	0.115276
LOC390308	1.83729	4.1643	2.18557	1.90536	0.0567332
CTBP2P1	1.40558	4.16275	2.31145	1.80092	0.0717151
RPL17P26	0.586026	4.15753	3.84504	1.08127	0.279577
GK2	0.587945	4.15579	3.84509	1.0808	0.279785
KCNK2	0.587945	4.15579	3.84509	1.0808	0.279785
SERPINB13	0.587945	4.15579	3.84509	1.0808	0.279785
AKR1D1	0.587945	4.15579	3.84509	1.0808	0.279785
OR1G1	0.587945	4.15579	3.84509	1.0808	0.279785
TRIM64	0.587945	4.15579	3.84509	1.0808	0.279785
OR8S1	0.587945	4.15579	3.84509	1.0808	0.279785
GNAT3	0.587945	4.15579	3.84509	1.0808	0.279785
LINC01567	0.587945	4.15579	3.84509	1.0808	0.279785
LINC01538	0.587945	4.15579	3.84509	1.0808	0.279785
RPL23P5	0.587945	4.15579	3.84509	1.0808	0.279785
PIRT	0.587945	4.15579	3.84509	1.0808	0.279785
TEX50	0.587945	4.15579	3.84509	1.0808	0.279785
LOC100129367	0.587945	4.15579	3.84509	1.0808	0.279785
UBE2FP2	0.587945	4.15579	3.84509	1.0808	0.279785
LINC01043	0.587945	4.15579	3.84509	1.0808	0.279785
HINT2P1	0.587945	4.15579	3.84509	1.0808	0.279785
LOC105374253	0.587945	4.15579	3.84509	1.0808	0.279785
LOC105376450	0.587945	4.15579	3.84509	1.0808	0.279785
LOC105376755	0.587945	4.15579	3.84509	1.0808	0.279785
LINC02507	0.587945	4.15579	3.84509	1.0808	0.279785
LOC107985896	0.587945	4.15579	3.84509	1.0808	0.279785
NYAP2	3.98263	4.14851	2.13712	1.94117	0.0522375
B3GALNT2P1	1.12011	4.14354	2.84658	1.45562	0.145497
CYP24A1	1.08324	4.14353	2.88016	1.43865	0.15025
LOC107984413	1.08324	4.14353	2.88016	1.43865	0.15025
LOC105375402	1.07474	4.14353	2.88812	1.43468	0.151379
DPF3	1.08516	4.14182	2.93414	1.41159	0.15807
LOC105374128	2.69221	4.13423	1.76282	2.34523	0.0190153
LINC02012	0.824858	4.1319	3.83708	1.07683	0.281555
ERVV-2	0.826777	4.13174	3.12061	1.32402	0.185497
TFAP2A-AS2	0.802742	4.13172	3.15385	1.31006	0.190177
KCNB2	1.38368	4.12846	2.75362	1.49928	0.1338
LOC105374445	1.39412	4.12735	2.72662	1.51372	0.130096
LOC105376759	1.37689	4.12697	2.32155	1.77768	0.0754566
MAP2	3.05519	4.12158	2.06292	1.99793	0.0457238
EEF1A1P24	1.74491	4.11127	1.73849	2.36485	0.0180375
LOC107986974	1.76823	4.11058	3.26044	1.26074	0.207402
OR1F1	1.07258	4.10237	3.04761	1.3461	0.178272
DCC	2.38278	4.10192	2.17837	1.88303	0.059697
LOC105372564	1.09286	4.10109	2.8811	1.42345	0.154607
LINC01968	1.07623	4.10107	2.89654	1.41585	0.156819
ZNF812P	1.06182	4.10105	2.91018	1.40921	0.158773
CFHR2	1.07005	4.09908	2.91699	1.40524	0.159949
LOC158435	1.09478	4.09903	2.89412	1.41633	0.15668
FRG1GP	1.09478	4.09903	2.89412	1.41633	0.15668
LOC105375265	1.35076	4.09549	2.39088	1.71296	0.0867197
CA5A	0.558777	4.09126	3.84706	1.06348	0.287566
SELENOP	0.558777	4.09126	3.84706	1.06348	0.287566
ABCA12	0.558777	4.09126	3.84706	1.06348	0.287566
ARHGAP28	0.558777	4.09126	3.84706	1.06348	0.287566
TM4SF19	0.558777	4.09126	3.84706	1.06348	0.287566
ACSM4	0.558777	4.09126	3.84706	1.06348	0.287566
DPY19L2P3	0.558777	4.09126	3.84706	1.06348	0.287566
WWTR1-AS1	0.558777	4.09126	3.84706	1.06348	0.287566
LOC100287072	0.558777	4.09126	3.84706	1.06348	0.287566
ARL6IP1P1	0.558777	4.09126	3.84706	1.06348	0.287566
ZNF887P	0.558777	4.09126	3.84706	1.06348	0.287566
ZNF839P1	0.558777	4.09126	3.84706	1.06348	0.287566
LINC00423	0.558777	4.09126	3.84706	1.06348	0.287566
LOC101927495	0.558777	4.09126	3.84706	1.06348	0.287566
ZNF337-AS1	0.558777	4.09126	3.84706	1.06348	0.287566
LOC105374873	0.558777	4.09126	3.84706	1.06348	0.287566
DRD1	0.560697	4.08914	3.84713	1.06291	0.287825
RIT2	0.560697	4.08914	3.84713	1.06291	0.287825
TRIM16	0.560697	4.08914	3.84713	1.06291	0.287825
EIF4A1P1	0.560697	4.08914	3.84713	1.06291	0.287825
PBOV1	0.560697	4.08914	3.84713	1.06291	0.287825
IL33	0.560697	4.08914	3.84713	1.06291	0.287825
DEFB118	0.560697	4.08914	3.84713	1.06291	0.287825
PODN	0.560697	4.08914	3.84713	1.06291	0.287825
ZFP42	0.560697	4.08914	3.84713	1.06291	0.287825
CCDC60	0.560697	4.08914	3.84713	1.06291	0.287825
MIR1-1HG-AS1	0.560697	4.08914	3.84713	1.06291	0.287825
MAPK6P6	0.560697	4.08914	3.84713	1.06291	0.287825
OR4D9	0.560697	4.08914	3.84713	1.06291	0.287825
CCDC144NL-AS1	0.560697	4.08914	3.84713	1.06291	0.287825
ACTR3BP1	0.560697	4.08914	3.84713	1.06291	0.287825
RPL21P109	0.560697	4.08914	3.84713	1.06291	0.287825
MTRNR2L7	0.560697	4.08914	3.84713	1.06291	0.287825
LINC02031	0.560697	4.08914	3.84713	1.06291	0.287825
LOC105370363	0.560697	4.08914	3.84713	1.06291	0.287825
LOC105370409	0.560697	4.08914	3.84713	1.06291	0.287825
LOC105371557	0.560697	4.08914	3.84713	1.06291	0.287825
LOC105372683	0.560697	4.08914	3.84713	1.06291	0.287825
LOC105377119	0.560697	4.08914	3.84713	1.06291	0.287825
LOC105377654	0.560697	4.08914	3.84713	1.06291	0.287825
LINC02465	0.560697	4.08914	3.84713	1.06291	0.287825
LOC107987110	0.560697	4.08914	3.84713	1.06291	0.287825
PSMC1P10	1.36911	4.08873	2.08286	1.96303	0.0496425
PLCH1	2.34674	4.08548	2.13585	1.91281	0.0557721
PPARG	4.00912	4.08335	2.0617	1.98057	0.047639
ANKRD45	1.78467	4.08293	2.67966	1.52368	0.12759
MINAR2	1.78467	4.08293	2.67966	1.52368	0.12759
RPS10P20	0.781169	4.07809	3.20317	1.27314	0.202967
EIF5A2P1	0.772103	4.0754	3.23245	1.26078	0.207389
GAPDHP2	0.793137	4.07533	3.20201	1.27274	0.203111
RBM26-AS1	3.5668	4.07034	2.05152	1.98406	0.0472492
RNF17	2.42838	4.0683	2.5466	1.59754	0.110144
LOC100131625	10.185	4.0639	2.78585	1.45876	0.14463
IFNLR1	1.34718	4.05858	2.86908	1.41459	0.157188
LOC107984360	1.33494	4.05747	3.44342	1.17832	0.238667
SAA2	1.39002	4.05736	3.39966	1.19346	0.232689
SYNDIG1	1.06561	4.05733	2.93142	1.38408	0.166334
KIAA1217	1.72056	4.05665	2.29196	1.76994	0.0767367
FAM78B-AS1	1.03259	4.05569	3.65084	1.11089	0.266615
TET1P1	1.06945	4.05558	3.60808	1.12403	0.261001
LOC105371751	1.06945	4.05558	3.60808	1.12403	0.261001
ACTG1P9	1.32438	4.05537	2.37076	1.71058	0.0871595
LOC105371867	1.35138	4.05532	2.35564	1.72153	0.0851542
LOC105377604	1.01946	4.05523	2.95073	1.37431	0.169344
LOC107984112	1.02216	4.05523	2.948	1.37559	0.16895
LOC105375821	1.03067	4.05521	2.9395	1.37956	0.167722
LOC105376528	1.71181	4.05343	2.65851	1.5247	0.127334
LOC100130207	3.10693	4.04859	2.05515	1.96997	0.0488417
LOC105370918	1.91543	4.03567	2.72487	1.48105	0.138593
LINGO2	2.9356	4.02662	1.7622	2.28499	0.0223131
LOC105370170	1.6452	4.02386	2.72936	1.47429	0.140405
LOC391771	0.763969	4.02232	3.28252	1.22537	0.220434
LOC105374726	1.35702	4.02069	3.40351	1.18134	0.237469
CDH10	1.30578	4.02022	2.79323	1.43927	0.150074
LOC112268413	1.32377	4.0202	2.78055	1.44583	0.148225
LOC105375148	1.36086	4.02017	2.75514	1.45916	0.144522
LINC02341	0.751518	4.01949	3.23977	1.24067	0.214727
ADAM3B	0.533449	4.01945	3.84936	1.04419	0.296399
S100A7	0.533449	4.01945	3.84936	1.04419	0.296399
OR7E2P	0.533449	4.01945	3.84936	1.04419	0.296399
LINC00326	0.533449	4.01945	3.84936	1.04419	0.296399
ZNF833P	0.533449	4.01945	3.84936	1.04419	0.296399
KRT8P49	0.533449	4.01945	3.84936	1.04419	0.296399
PATE3	0.533449	4.01945	3.84936	1.04419	0.296399
FRG2C	0.533449	4.01945	3.84936	1.04419	0.296399
LDHBP1	0.533449	4.01945	3.84936	1.04419	0.296399
PGBD4P2	0.533449	4.01945	3.84936	1.04419	0.296399
LOC100533723	0.533449	4.01945	3.84936	1.04419	0.296399
LINC01111	0.533449	4.01945	3.84936	1.04419	0.296399
LOC105370317	0.533449	4.01945	3.84936	1.04419	0.296399
LOC105373640	0.533449	4.01945	3.84936	1.04419	0.296399
LOC105375935	0.533449	4.01945	3.84936	1.04419	0.296399
LOC105375937	0.533449	4.01945	3.84936	1.04419	0.296399
LOC105376950	0.533449	4.01945	3.84936	1.04419	0.296399
LOC105378311	0.533449	4.01945	3.84936	1.04419	0.296399
LINC01078	0.533449	4.01945	3.84936	1.04419	0.296399
NOP56P3	0.533449	4.01945	3.84936	1.04419	0.296399
LOC107986371	0.533449	4.01945	3.84936	1.04419	0.296399
PARD3B	6.22817	4.01768	2.05539	1.95471	0.0506172
ASTN1	0.535368	4.01684	3.84944	1.04348	0.296724
CLCA1	0.535368	4.01684	3.84944	1.04348	0.296724
EFNB3	0.535368	4.01684	3.84944	1.04348	0.296724
GM2AP1	0.535368	4.01684	3.84944	1.04348	0.296724
LAMC1	0.535368	4.01684	3.84944	1.04348	0.296724
ODF1	0.535368	4.01684	3.84944	1.04348	0.296724
PTPRZ1	0.535368	4.01684	3.84944	1.04348	0.296724
SERPINB3	0.535368	4.01684	3.84944	1.04348	0.296724
SLC1A1	0.535368	4.01684	3.84944	1.04348	0.296724
SLC9A3P1	0.535368	4.01684	3.84944	1.04348	0.296724
SPRR2G	0.535368	4.01684	3.84944	1.04348	0.296724
SYT1	0.535368	4.01684	3.84944	1.04348	0.296724
ABCA8	0.535368	4.01684	3.84944	1.04348	0.296724
YAP1	0.535368	4.01684	3.84944	1.04348	0.296724
IGHVII-15-1	0.535368	4.01684	3.84944	1.04348	0.296724
TRBV5-7	0.535368	4.01684	3.84944	1.04348	0.296724
RAB9B	0.535368	4.01684	3.84944	1.04348	0.296724
SPTLC3	0.535368	4.01684	3.84944	1.04348	0.296724
ARHGAP20	0.535368	4.01684	3.84944	1.04348	0.296724
APOL5	0.535368	4.01684	3.84944	1.04348	0.296724
CRISPLD1	0.535368	4.01684	3.84944	1.04348	0.296724
DDIT4L	0.535368	4.01684	3.84944	1.04348	0.296724
OR51F2	0.535368	4.01684	3.84944	1.04348	0.296724
RPL7AP27	0.535368	4.01684	3.84944	1.04348	0.296724
ASS1P3	0.535368	4.01684	3.84944	1.04348	0.296724
LRRN4	0.535368	4.01684	3.84944	1.04348	0.296724
LINC00858	0.535368	4.01684	3.84944	1.04348	0.296724
SPA17P1	0.535368	4.01684	3.84944	1.04348	0.296724
FOLH1B	0.535368	4.01684	3.84944	1.04348	0.296724
SYCP2L	0.535368	4.01684	3.84944	1.04348	0.296724
COL6A5	0.535368	4.01684	3.84944	1.04348	0.296724
LOC283028	0.535368	4.01684	3.84944	1.04348	0.296724
CCDC158	0.535368	4.01684	3.84944	1.04348	0.296724
LOC344593	0.535368	4.01684	3.84944	1.04348	0.296724
KLRG2	0.535368	4.01684	3.84944	1.04348	0.296724
IYD	0.535368	4.01684	3.84944	1.04348	0.296724
SPATA31D1	0.535368	4.01684	3.84944	1.04348	0.296724
OR11H7	0.535368	4.01684	3.84944	1.04348	0.296724
RPL7L1P5	0.535368	4.01684	3.84944	1.04348	0.296724
ZSWIM5P3	0.535368	4.01684	3.84944	1.04348	0.296724
MIR30E	0.535368	4.01684	3.84944	1.04348	0.296724
FLJ46284	0.535368	4.01684	3.84944	1.04348	0.296724
LOC441455	0.535368	4.01684	3.84944	1.04348	0.296724
RPS7P8	0.535368	4.01684	3.84944	1.04348	0.296724
GAPDHP70	0.535368	4.01684	3.84944	1.04348	0.296724
RPL21P68	0.535368	4.01684	3.84944	1.04348	0.296724
MS4A18	0.535368	4.01684	3.84944	1.04348	0.296724
PWRN2	0.535368	4.01684	3.84944	1.04348	0.296724
LOC100128776	0.535368	4.01684	3.84944	1.04348	0.296724
CDC42EP3P1	0.535368	4.01684	3.84944	1.04348	0.296724
RPL6P23	0.535368	4.01684	3.84944	1.04348	0.296724
TATDN2P3	0.535368	4.01684	3.84944	1.04348	0.296724
MIR3157	0.535368	4.01684	3.84944	1.04348	0.296724
CCDC169-SOHLH2	0.535368	4.01684	3.84944	1.04348	0.296724
KLHL7-DT	0.535368	4.01684	3.84944	1.04348	0.296724
LINC00581	0.535368	4.01684	3.84944	1.04348	0.296724
LINC01910	0.535368	4.01684	3.84944	1.04348	0.296724
LOC101927711	0.535368	4.01684	3.84944	1.04348	0.296724
LINC02660	0.535368	4.01684	3.84944	1.04348	0.296724
LOC101928222	0.535368	4.01684	3.84944	1.04348	0.296724
LOC101928398	0.535368	4.01684	3.84944	1.04348	0.296724
LOC101928735	0.535368	4.01684	3.84944	1.04348	0.296724
MCM8-AS1	0.535368	4.01684	3.84944	1.04348	0.296724
LOC102724780	0.535368	4.01684	3.84944	1.04348	0.296724
LOC102724877	0.535368	4.01684	3.84944	1.04348	0.296724
LINC02468	0.535368	4.01684	3.84944	1.04348	0.296724
LOC105369935	0.535368	4.01684	3.84944	1.04348	0.296724
LOC105370656	0.535368	4.01684	3.84944	1.04348	0.296724
LOC105370789	0.535368	4.01684	3.84944	1.04348	0.296724
LOC105371648	0.535368	4.01684	3.84944	1.04348	0.296724
LOC105372042	0.535368	4.01684	3.84944	1.04348	0.296724
LOC105372912	0.535368	4.01684	3.84944	1.04348	0.296724
LOC105373208	0.535368	4.01684	3.84944	1.04348	0.296724
LOC105373397	0.535368	4.01684	3.84944	1.04348	0.296724
LOC105373845	0.535368	4.01684	3.84944	1.04348	0.296724
LOC105374029	0.535368	4.01684	3.84944	1.04348	0.296724
LOC105374145	0.535368	4.01684	3.84944	1.04348	0.296724
LOC105374421	0.535368	4.01684	3.84944	1.04348	0.296724
LOC105375065	0.535368	4.01684	3.84944	1.04348	0.296724
LOC105375194	0.535368	4.01684	3.84944	1.04348	0.296724
LINC02830	0.535368	4.01684	3.84944	1.04348	0.296724
LOC105375639	0.535368	4.01684	3.84944	1.04348	0.296724
LOC105376209	0.535368	4.01684	3.84944	1.04348	0.296724
LOC105376479	0.535368	4.01684	3.84944	1.04348	0.296724
LOC105376589	0.535368	4.01684	3.84944	1.04348	0.296724
LOC105376874	0.535368	4.01684	3.84944	1.04348	0.296724
LOC105377024	0.535368	4.01684	3.84944	1.04348	0.296724
LINC02050	0.535368	4.01684	3.84944	1.04348	0.296724
LOC105378468	0.535368	4.01684	3.84944	1.04348	0.296724
LOC105378737	0.535368	4.01684	3.84944	1.04348	0.296724
LOC105379119	0.535368	4.01684	3.84944	1.04348	0.296724
LINC01616	0.535368	4.01684	3.84944	1.04348	0.296724
RN7SL107P	0.535368	4.01684	3.84944	1.04348	0.296724
LOC107984486	0.535368	4.01684	3.84944	1.04348	0.296724
LOC107984585	0.535368	4.01684	3.84944	1.04348	0.296724
LOC107985046	0.535368	4.01684	3.84944	1.04348	0.296724
LOC107985159	0.535368	4.01684	3.84944	1.04348	0.296724
LOC107985324	0.535368	4.01684	3.84944	1.04348	0.296724
LOC107986312	0.535368	4.01684	3.84944	1.04348	0.296724
LOC107986614	0.535368	4.01684	3.84944	1.04348	0.296724
LOC107986632	0.535368	4.01684	3.84944	1.04348	0.296724
LOC107986654	0.535368	4.01684	3.84944	1.04348	0.296724
ROS1	1.96615	4.01175	2.1782	1.84177	0.0655083
ME2P1	3.239	4.01066	2.16164	1.85538	0.0635423
ADAM3A	1.01556	4.01001	2.95011	1.35928	0.174059
LINC01152	1.61895	4.00745	2.28518	1.75366	0.079488
COL4A3	2.1271	3.99962	2.60839	1.53337	0.125185
SLC30A10	1.70484	3.99549	2.71521	1.47152	0.14115
SLC6A1	1.66116	3.9949	3.31763	1.20414	0.228534
LOC101929752	1.7106	3.9949	3.31633	1.20462	0.228352
LINC02371	1.63332	3.99487	2.68718	1.48664	0.13711
ARFGEF3	2.01728	3.9929	2.63367	1.5161	0.129495
SUMO1P2	1.27829	3.98762	2.13435	1.86831	0.0617194
HPD	181.817	3.98748	0.965105	4.13165	3.60166e-05
KCNH5	4.0508	3.98636	1.73792	2.29375	0.0218046
MYO6	2.80346	3.98619	2.54861	1.56407	0.117801
F11-AS1	1.33361	3.98312	2.76975	1.43808	0.150411
LOC105377356	1.26754	3.98298	2.38721	1.66847	0.0952233
LOC105379039	1.28024	3.98189	2.87218	1.38637	0.165635
LOC101927012	1.98776	3.96928	2.62007	1.51496	0.129784
LOC107986058	1.64847	3.96574	2.25537	1.75835	0.0786874
LOC102723623	0.983687	3.96399	2.55121	1.55377	0.12024
LOC105375710	1.68143	3.96395	2.7116	1.46185	0.143782
LOC112267858	1.68143	3.96395	2.7116	1.46185	0.143782
CLUL1	1.01303	3.96343	2.95914	1.33939	0.180444
KRT18P66	1.01303	3.96343	2.95914	1.33939	0.180444
PGM5P4	0.967668	3.96338	3.00678	1.31815	0.187454
LOC105370221	0.986391	3.96321	3.68464	1.0756	0.282104
ABO	0.965749	3.96314	3.71136	1.06784	0.285593
KIR3DL3	0.726602	3.96256	3.84145	1.03153	0.302294
RFX6	0.715687	3.96256	3.84145	1.03153	0.302294
LOC105375689	0.745032	3.96256	3.84145	1.03153	0.302294
LOC107984408	0.726602	3.96256	3.84145	1.03153	0.302294
SLC25A51P3	0.746952	3.96147	3.24175	1.22201	0.221703
LINC01206	0.746952	3.96147	3.24175	1.22201	0.221703
SUMO2P11	0.722916	3.96146	3.28003	1.20775	0.227142
FAM171B	0.717606	3.96146	3.28872	1.20456	0.228373
LOC105369846	0.717606	3.96146	3.28872	1.20456	0.228373
LOC100101126	1.01495	3.96102	2.99798	1.32123	0.186425
MYEF2	45.6989	3.96088	1.17798	3.36243	0.000772611
AKIRIN2P1	0.724836	3.96034	3.84152	1.03093	0.302573
LINC00184	0.73335	3.96034	3.84152	1.03093	0.302573
PCAT5	0.726189	3.96034	3.84152	1.03093	0.302573
LOC105375153	3.46767	3.96016	2.18896	1.80915	0.0704273
ZNF702P	2.45117	3.95551	2.13712	1.85086	0.0641901
SLCO6A1	0.5062	3.94645	3.85181	1.02457	0.305566
LOC101060152	0.5062	3.94645	3.85181	1.02457	0.305566
LOC107985854	1.30636	3.94512	2.79202	1.41299	0.157657
LOC107984740	1.25128	3.94509	2.83237	1.39286	0.163662
LOC107984886	1.25128	3.94509	2.83237	1.39286	0.163662
MAGI2-AS3	1.2712	3.9436	2.84574	1.38579	0.16581
ADCY1	1.28335	3.94358	2.83692	1.3901	0.1645
RANBP17	5.51357	3.94357	1.78996	2.20317	0.0275829
MFSD2B	1.30828	3.94354	2.81916	1.39883	0.161863
GUCA1C	0.50812	3.9433	3.85192	1.02372	0.305966
OR5H6	0.50812	3.9433	3.85192	1.02372	0.305966
HSPE1P16	0.50812	3.9433	3.85192	1.02372	0.305966
OR8D1	0.50812	3.9433	3.85192	1.02372	0.305966
RPS13P6	0.50812	3.9433	3.85192	1.02372	0.305966
LOC112267893	0.50812	3.9433	3.85192	1.02372	0.305966
GRM3	1.65227	3.93389	2.72378	1.44427	0.148662
NEDD4L	2.38734	3.93329	2.14195	1.83632	0.0663108
LINC02225	1.58602	3.93124	2.35917	1.66637	0.0956399
LINC02504	2.24149	3.91598	2.60878	1.50108	0.133336
IQGAP3	0.94042	3.91519	3.05858	1.28007	0.200522
LOC105379361	2.24341	3.91446	2.64685	1.47891	0.139165
TMEM150C	0.97108	3.91271	3.01533	1.2976	0.194423
ASPA	1.22211	3.90527	3.51653	1.11054	0.266765
LOC107986764	1.20915	3.90523	3.52871	1.1067	0.268422
LOC105372640	1.18916	3.90519	3.54784	1.10072	0.271018
PRKN	1.193	3.9045	2.8881	1.35192	0.176399
NOS1	1.28103	3.90439	2.82086	1.38411	0.166324
TAAR5	1.26867	3.90344	2.40222	1.62493	0.104177
GYS2	0.711392	3.90109	3.3125	1.17769	0.238922
NIP7P2	0.707342	3.90108	3.31925	1.17529	0.239879
LOC105376692	0.721623	3.89774	3.3658	1.15804	0.246847
COL28A1	5.66414	3.8955	2.13057	1.82838	0.0674919
GPR12	2.66722	3.89355	2.56185	1.51982	0.128556
ADAMTS9	2.26458	3.87961	2.61014	1.48636	0.137184
LOC105377481	1.58133	3.87022	2.32897	1.66177	0.096559
AOX1	0.478952	3.86986	3.85452	1.00398	0.315389
ATP1A4	0.478952	3.86986	3.85452	1.00398	0.315389
CPN2	0.478952	3.86986	3.85452	1.00398	0.315389
ID4	0.478952	3.86986	3.85452	1.00398	0.315389
IGFBP5	0.478952	3.86986	3.85452	1.00398	0.315389
LRP4	0.478952	3.86986	3.85452	1.00398	0.315389
NEFM	0.478952	3.86986	3.85452	1.00398	0.315389
PCSK2	0.478952	3.86986	3.85452	1.00398	0.315389
SRL	0.478952	3.86986	3.85452	1.00398	0.315389
FHL5	0.478952	3.86986	3.85452	1.00398	0.315389
PPP1R26	0.478952	3.86986	3.85452	1.00398	0.315389
KLK13	0.478952	3.86986	3.85452	1.00398	0.315389
IGLV5-45	0.478952	3.86986	3.85452	1.00398	0.315389
ELOVL2	0.478952	3.86986	3.85452	1.00398	0.315389
SEMA6D	0.478952	3.86986	3.85452	1.00398	0.315389
COX7BP1	0.478952	3.86986	3.85452	1.00398	0.315389
ACER1	0.478952	3.86986	3.85452	1.00398	0.315389
SLC36A2	0.478952	3.86986	3.85452	1.00398	0.315389
STRC	0.478952	3.86986	3.85452	1.00398	0.315389
SRRM3	0.478952	3.86986	3.85452	1.00398	0.315389
C9orf43	0.478952	3.86986	3.85452	1.00398	0.315389
C20orf203	0.478952	3.86986	3.85452	1.00398	0.315389
NEXMIF	0.478952	3.86986	3.85452	1.00398	0.315389
ARMS2	0.478952	3.86986	3.85452	1.00398	0.315389
GAPDHP26	0.478952	3.86986	3.85452	1.00398	0.315389
LRRC74B	0.478952	3.86986	3.85452	1.00398	0.315389
LINC00687	0.478952	3.86986	3.85452	1.00398	0.315389
LOC100130353	0.478952	3.86986	3.85452	1.00398	0.315389
SERBP1P4	0.478952	3.86986	3.85452	1.00398	0.315389
RPL6P28	0.478952	3.86986	3.85452	1.00398	0.315389
RASSF8-AS1	0.478952	3.86986	3.85452	1.00398	0.315389
LINC02078	0.478952	3.86986	3.85452	1.00398	0.315389
LINC01544	0.478952	3.86986	3.85452	1.00398	0.315389
LINC02444	0.478952	3.86986	3.85452	1.00398	0.315389
LOC101929227	0.478952	3.86986	3.85452	1.00398	0.315389
LINC02654	0.478952	3.86986	3.85452	1.00398	0.315389
LOC102724908	0.478952	3.86986	3.85452	1.00398	0.315389
LOC102724948	0.478952	3.86986	3.85452	1.00398	0.315389
LOC105369784	0.478952	3.86986	3.85452	1.00398	0.315389
LOC105370007	0.478952	3.86986	3.85452	1.00398	0.315389
LOC105370873	0.478952	3.86986	3.85452	1.00398	0.315389
LOC105372437	0.478952	3.86986	3.85452	1.00398	0.315389
LOC105372624	0.478952	3.86986	3.85452	1.00398	0.315389
LOC105372926	0.478952	3.86986	3.85452	1.00398	0.315389
LOC105373250	0.478952	3.86986	3.85452	1.00398	0.315389
LOC105374221	0.478952	3.86986	3.85452	1.00398	0.315389
LOC105374336	0.478952	3.86986	3.85452	1.00398	0.315389
LOC105375120	0.478952	3.86986	3.85452	1.00398	0.315389
ZNF775-AS1	0.478952	3.86986	3.85452	1.00398	0.315389
LOC105375835	0.478952	3.86986	3.85452	1.00398	0.315389
LOC105375861	0.478952	3.86986	3.85452	1.00398	0.315389
LOC105376121	0.478952	3.86986	3.85452	1.00398	0.315389
LOC105377110	0.478952	3.86986	3.85452	1.00398	0.315389
LOC105377148	0.478952	3.86986	3.85452	1.00398	0.315389
KCNIP1-AS1	0.478952	3.86986	3.85452	1.00398	0.315389
LOC105378148	0.478952	3.86986	3.85452	1.00398	0.315389
LOC105378606	0.478952	3.86986	3.85452	1.00398	0.315389
LOC105379675	0.478952	3.86986	3.85452	1.00398	0.315389
LOC107984031	0.478952	3.86986	3.85452	1.00398	0.315389
SULT6B2P	0.478952	3.86986	3.85452	1.00398	0.315389
LOC107985499	0.478952	3.86986	3.85452	1.00398	0.315389
SRSF3P6	0.478952	3.86986	3.85452	1.00398	0.315389
LOC107986097	0.478952	3.86986	3.85452	1.00398	0.315389
LOC107986256	0.478952	3.86986	3.85452	1.00398	0.315389
ZNF474-AS1	0.478952	3.86986	3.85452	1.00398	0.315389
LOC107987256	0.478952	3.86986	3.85452	1.00398	0.315389
LOC112268266	0.478952	3.86986	3.85452	1.00398	0.315389
LOC107984685	1.60353	3.86914	3.37646	1.14592	0.25183
HSPD1P5	1.60161	3.86854	2.76356	1.39984	0.161563
LOC107985962	1.53344	3.868	2.86695	1.34917	0.177283
CALD1	0.480871	3.86605	3.85466	1.00296	0.315882
FGFR3	0.480871	3.86605	3.85466	1.00296	0.315882
CCL22	0.480871	3.86605	3.85466	1.00296	0.315882
SYT13	0.480871	3.86605	3.85466	1.00296	0.315882
OR7D4	0.480871	3.86605	3.85466	1.00296	0.315882
LOC204800	0.480871	3.86605	3.85466	1.00296	0.315882
CXorf66	0.480871	3.86605	3.85466	1.00296	0.315882
MRPS21P2	0.480871	3.86605	3.85466	1.00296	0.315882
SALL4P7	0.480871	3.86605	3.85466	1.00296	0.315882
LINC01192	0.480871	3.86605	3.85466	1.00296	0.315882
FARSBP1	0.480871	3.86605	3.85466	1.00296	0.315882
DIRC3	0.480871	3.86605	3.85466	1.00296	0.315882
RPL21P132	0.480871	3.86605	3.85466	1.00296	0.315882
MIR4424	0.480871	3.86605	3.85466	1.00296	0.315882
CLYBL-AS2	0.480871	3.86605	3.85466	1.00296	0.315882
SNRPEP10	0.480871	3.86605	3.85466	1.00296	0.315882
LOC102723576	0.480871	3.86605	3.85466	1.00296	0.315882
SALRNA2	0.480871	3.86605	3.85466	1.00296	0.315882
LOC105371114	0.480871	3.86605	3.85466	1.00296	0.315882
LOC105371734	0.480871	3.86605	3.85466	1.00296	0.315882
LOC105373016	0.480871	3.86605	3.85466	1.00296	0.315882
LOC105374651	0.480871	3.86605	3.85466	1.00296	0.315882
LOC105374681	0.480871	3.86605	3.85466	1.00296	0.315882
LOC105375317	0.480871	3.86605	3.85466	1.00296	0.315882
LOC105375914	0.480871	3.86605	3.85466	1.00296	0.315882
LOC105379048	0.480871	3.86605	3.85466	1.00296	0.315882
LOC105379384	0.480871	3.86605	3.85466	1.00296	0.315882
SEPTIN14P1	0.480871	3.86605	3.85466	1.00296	0.315882
LOC107984862	0.480871	3.86605	3.85466	1.00296	0.315882
GBA3	1.22885	3.86423	2.85169	1.35507	0.175396
LOC101928446	0.91701	3.8628	3.79701	1.01733	0.308998
SLC16A9	0.943832	3.8628	3.0338	1.27325	0.202928
PCDHB11	0.960455	3.86278	3.01539	1.28102	0.200185
LOC100287846	0.960455	3.86278	3.01539	1.28102	0.200185
CBX3P5	0.931333	3.86274	3.77374	1.02358	0.306032
LOC101927978	0.937652	3.86271	3.76481	1.026	0.304889
LRRC15	0.962374	3.86263	3.73382	1.0345	0.300903
BMP3	2.96307	3.86234	2.15307	1.79388	0.0728327
CISD1P1	2.19921	3.84468	1.524	2.52275	0.011644
LOC100128673	1.97814	3.84269	2.30923	1.66406	0.0961013
RPS15AP37	0.670339	3.83442	3.39733	1.12866	0.259042
COX6B1P1	0.671693	3.83442	3.3949	1.12946	0.258703
ARF1P2	1.51289	3.83365	2.49114	1.53891	0.123826
ITGB3	1.77747	3.83223	2.26949	1.68859	0.091298
ITPRID1	2.10588	3.82665	2.7464	1.39333	0.163519
LOC105379012	1.18945	3.82294	2.8828	1.32612	0.184801
LOC105374186	1.1385	3.82293	2.92521	1.30689	0.19125
LOC105378340	4.89583	3.82198	1.77092	2.15819	0.0309129
LOC105378563	0.931287	3.81154	3.752	1.01587	0.309692
LOC105377984	0.914665	3.81147	3.77589	1.00942	0.312772
ICE2P1	0.894426	3.81138	3.80754	1.00101	0.316822
OR6W1P	0.872597	3.81131	3.83708	0.993282	0.320573
SLC22A9	0.933206	3.81119	3.04765	1.25053	0.211105
CNNM1	0.908485	3.81117	3.07631	1.23888	0.215392
LOC105371366	0.896345	3.81116	3.09078	1.23307	0.217549
LOC105375892	2.22414	3.80917	2.23166	1.70688	0.0878442
CFAP299	1.49983	3.80462	2.34202	1.62451	0.104268
LOC105372268	1.54327	3.80127	3.39319	1.12027	0.262601
LRATD1	4.65488	3.79413	1.79884	2.10921	0.0349262
LOC105370469	2.81675	3.79224	2.17333	1.7449	0.0810031
LOC105374785	3.0984	3.78678	1.78502	2.12142	0.0338866
AQP7	0.453623	3.78474	3.8577	0.981088	0.326549
CDH9	0.453623	3.78474	3.8577	0.981088	0.326549
GRM8	0.453623	3.78474	3.8577	0.981088	0.326549
GYPA	0.453623	3.78474	3.8577	0.981088	0.326549
DGKI	0.453623	3.78474	3.8577	0.981088	0.326549
USH1C	0.453623	3.78474	3.8577	0.981088	0.326549
KRTAP9-4	0.453623	3.78474	3.8577	0.981088	0.326549
TBL1Y	0.453623	3.78474	3.8577	0.981088	0.326549
CDRT7	0.453623	3.78474	3.8577	0.981088	0.326549
OR10J4	0.453623	3.78474	3.8577	0.981088	0.326549
IMPDH1P9	0.453623	3.78474	3.8577	0.981088	0.326549
WEE2	0.453623	3.78474	3.8577	0.981088	0.326549
LINC02315	0.453623	3.78474	3.8577	0.981088	0.326549
ST13P20	0.453623	3.78474	3.8577	0.981088	0.326549
HNRNPA1P77	0.453623	3.78474	3.8577	0.981088	0.326549
RPL35P9	0.453623	3.78474	3.8577	0.981088	0.326549
LOC102723624	0.453623	3.78474	3.8577	0.981088	0.326549
LOC102723834	0.453623	3.78474	3.8577	0.981088	0.326549
LOC105369309	0.453623	3.78474	3.8577	0.981088	0.326549
LOC105369859	0.453623	3.78474	3.8577	0.981088	0.326549
LOC105370213	0.453623	3.78474	3.8577	0.981088	0.326549
LOC105370345	0.453623	3.78474	3.8577	0.981088	0.326549
LINC01789	0.453623	3.78474	3.8577	0.981088	0.326549
LOC105378882	0.453623	3.78474	3.8577	0.981088	0.326549
LOC112268028	0.453623	3.78474	3.8577	0.981088	0.326549
GOLGA6L1	1.16994	3.78126	2.46646	1.53307	0.125257
LOC105370108	1.17243	3.78001	3.56077	1.06157	0.288431
ATRIP-TREX1	293.993	3.77984	2.4443	1.54639	0.12201
TP63	3.26346	3.77901	1.79225	2.10853	0.0349848
THSD7B	1.20121	3.77844	2.89692	1.30429	0.192133
LOC107987152	2.50949	3.77263	2.62889	1.43507	0.151268
LOC105376910	0.646847	3.77066	3.84706	0.980141	0.327016
FUT2	0.644444	3.76831	3.42813	1.09923	0.271667
WASF3	0.644444	3.76831	3.42813	1.09923	0.271667
LRCH2	1.47642	3.76538	2.37253	1.58708	0.112495
LOC107987054	2.09621	3.75852	2.21851	1.69417	0.0902337
CLNK	4.0303	3.75847	1.79712	2.09139	0.0364934
LOC105370781	0.905958	3.7577	3.09768	1.21307	0.225104
LOC105374672	0.905958	3.7577	3.09768	1.21307	0.225104
MALRD1	3.23107	3.75769	2.18123	1.72274	0.0849363
WFDC2	0.860595	3.75759	3.15313	1.1917	0.233379
LOC642890	0.860595	3.75759	3.15313	1.1917	0.233379
IL1RAPL2	0.849187	3.75469	3.18349	1.17942	0.23823
LOC102724078	0.849187	3.75469	3.18349	1.17942	0.23823
LINC01039	0.849187	3.75469	3.18349	1.17942	0.23823
LOC107986669	0.862514	3.75464	3.16657	1.18571	0.235737
DDX18P4	0.907877	3.75449	3.11157	1.20662	0.227578
MEIS2	1.39627	3.75238	2.40952	1.55731	0.119396
NKAIN3	6.70643	3.74851	1.6827	2.22768	0.0259018
LOC105374854	1.81921	3.74674	2.26662	1.65301	0.098329
KIAA1549	2.89422	3.74469	2.15265	1.73957	0.0819337
LOC101927189	2.06123	3.74463	2.21065	1.69391	0.0902831
ARNTL2	2.57776	3.74408	2.18115	1.71656	0.0860595
PCSK1	1.10783	3.73508	3.64608	1.02441	0.305641
IRX2	1.12058	3.73505	3.63259	1.0282	0.303853
NOC2LP1	1.12058	3.73505	3.63259	1.0282	0.303853
LOC100507403	1.12058	3.73505	3.63259	1.0282	0.303853
TCP1P1	1.13879	3.735	3.6137	1.03357	0.301339
LOC107984193	1.15094	3.73497	3.60134	1.03711	0.299687
CBLN4	1.17588	3.7349	3.57652	1.04428	0.296355
PIWIL1	1.17396	3.73457	2.90389	1.28606	0.198422
LOC107986369	1.17396	3.73457	2.90389	1.28606	0.198422
OTOA	1.12712	3.73314	3.07113	1.21556	0.224154
PRL	1.49645	3.73138	3.44279	1.08383	0.278442
PLAC4	1.42081	3.73094	2.83093	1.31792	0.18753
LOC105375696	1.41437	3.73016	2.9297	1.27322	0.202939
TTPA	1.45109	3.73011	2.91242	1.28076	0.200279
EPB41L4B	1.34607	3.72116	3.50162	1.0627	0.287919
GUCY1A1	2.43468	3.72014	2.25407	1.65041	0.0988583
HHIP	4.42542	3.71278	2.1137	1.75653	0.0789978
LOC105371629	1.88163	3.70685	2.29146	1.61768	0.105732
GRIN2B	3.76266	3.70584	1.91447	1.9357	0.0529048
SOWAHC	2.16826	3.70404	1.75891	2.10588	0.0352152
LOC105370299	2.03118	3.7036	3.28433	1.12766	0.259465
LOC102724070	0.639878	3.69919	3.44338	1.07429	0.282693
RPL7L1P13	0.617196	3.69915	3.48806	1.06052	0.28891
ZNF33BP1	0.615843	3.69915	3.4908	1.05968	0.289288
CHRM2	0.426375	3.69894	3.86109	0.958003	0.338061
CFAP52	0.426375	3.69894	3.86109	0.958003	0.338061
EIF3LP1	0.426375	3.69894	3.86109	0.958003	0.338061
GAPDHP37	0.426375	3.69894	3.86109	0.958003	0.338061
LOC102724527	0.426375	3.69894	3.86109	0.958003	0.338061
RPL31P39	0.835266	3.69881	3.1782	1.16381	0.244502
LOC105377393	0.843909	3.6988	3.16685	1.16797	0.242818
LINC02616	0.855907	3.69877	3.15137	1.1737	0.240514
UGT2B25P	0.880629	3.69873	3.12036	1.18535	0.235878
LINC01088	0.880629	3.69873	3.12036	1.18535	0.235878
THEGL	0.880629	3.69873	3.12036	1.18535	0.235878
SIM1-AS1	0.880629	3.69873	3.12036	1.18535	0.235878
LINC02015	0.880629	3.69873	3.12036	1.18535	0.235878
LOC105371659	0.880629	3.69873	3.12036	1.18535	0.235878
CCKBR	3.33982	3.6987	2.26153	1.63549	0.101947
TMEM178A	0.612452	3.69624	3.84944	0.960202	0.336954
PCNAP3	0.612452	3.69624	3.84944	0.960202	0.336954
LOC107985156	0.641797	3.69624	3.84944	0.960202	0.336954
LOC101928978	1.46537	3.6959	2.83938	1.30166	0.193033
SEPTIN10	1.41592	3.6959	2.83942	1.30164	0.19304
LOC112267868	1.41784	3.69469	2.82699	1.30694	0.191234
A1CF	1.46345	3.69449	3.44513	1.07238	0.283549
DGKB	2.00009	3.69415	2.69431	1.37109	0.170346
ADCYAP1	0.428294	3.69333	3.86132	0.956494	0.338823
CHRM1	0.428294	3.69333	3.86132	0.956494	0.338823
CYLC1	0.428294	3.69333	3.86132	0.956494	0.338823
HOXD9	0.428294	3.69333	3.86132	0.956494	0.338823
HOXD12	0.428294	3.69333	3.86132	0.956494	0.338823
KNG1	0.428294	3.69333	3.86132	0.956494	0.338823
MTTP	0.428294	3.69333	3.86132	0.956494	0.338823
RHO	0.428294	3.69333	3.86132	0.956494	0.338823
SCTR	0.428294	3.69333	3.86132	0.956494	0.338823
MKRN4P	0.428294	3.69333	3.86132	0.956494	0.338823
UGT2A1	0.428294	3.69333	3.86132	0.956494	0.338823
ZNF521	0.428294	3.69333	3.86132	0.956494	0.338823
CACNG5	0.428294	3.69333	3.86132	0.956494	0.338823
PADI1	0.428294	3.69333	3.86132	0.956494	0.338823
UGT1A6	0.428294	3.69333	3.86132	0.956494	0.338823
LMO3	0.428294	3.69333	3.86132	0.956494	0.338823
CABP5	0.428294	3.69333	3.86132	0.956494	0.338823
SMOC2	0.428294	3.69333	3.86132	0.956494	0.338823
REEP1	0.428294	3.69333	3.86132	0.956494	0.338823
SPRY4	0.428294	3.69333	3.86132	0.956494	0.338823
FCRL4	0.428294	3.69333	3.86132	0.956494	0.338823
KRTAP4-2	0.428294	3.69333	3.86132	0.956494	0.338823
GPR139	0.428294	3.69333	3.86132	0.956494	0.338823
GOLT1A	0.428294	3.69333	3.86132	0.956494	0.338823
TRIM71	0.428294	3.69333	3.86132	0.956494	0.338823
FRMPD2	0.428294	3.69333	3.86132	0.956494	0.338823
LINC01854	0.428294	3.69333	3.86132	0.956494	0.338823
TMEM213	0.428294	3.69333	3.86132	0.956494	0.338823
GRAMD2A	0.428294	3.69333	3.86132	0.956494	0.338823
ERICH6B	0.428294	3.69333	3.86132	0.956494	0.338823
NALCN	0.428294	3.69333	3.86132	0.956494	0.338823
LINC02028	0.428294	3.69333	3.86132	0.956494	0.338823
C5orf64	0.428294	3.69333	3.86132	0.956494	0.338823
EIF4BP1	0.428294	3.69333	3.86132	0.956494	0.338823
LINC02260	0.428294	3.69333	3.86132	0.956494	0.338823
DCAF8L2	0.428294	3.69333	3.86132	0.956494	0.338823
LOC390306	0.428294	3.69333	3.86132	0.956494	0.338823
KRT8P29	0.428294	3.69333	3.86132	0.956494	0.338823
LOC399783	0.428294	3.69333	3.86132	0.956494	0.338823
C11orf87	0.428294	3.69333	3.86132	0.956494	0.338823
C1orf220	0.428294	3.69333	3.86132	0.956494	0.338823
NIFKP1	0.428294	3.69333	3.86132	0.956494	0.338823
RPL7L1P8	0.428294	3.69333	3.86132	0.956494	0.338823
RPL15P11	0.428294	3.69333	3.86132	0.956494	0.338823
LINC01194	0.428294	3.69333	3.86132	0.956494	0.338823
LINC02372	0.428294	3.69333	3.86132	0.956494	0.338823
EEF1B2P5	0.428294	3.69333	3.86132	0.956494	0.338823
TUBG1P	0.428294	3.69333	3.86132	0.956494	0.338823
DUXAP4	0.428294	3.69333	3.86132	0.956494	0.338823
MIR526B	0.428294	3.69333	3.86132	0.956494	0.338823
TMEM75	0.428294	3.69333	3.86132	0.956494	0.338823
AKAIN1	0.428294	3.69333	3.86132	0.956494	0.338823
LINC00535	0.428294	3.69333	3.86132	0.956494	0.338823
TPTE2P2	0.428294	3.69333	3.86132	0.956494	0.338823
RPL7P58	0.428294	3.69333	3.86132	0.956494	0.338823
LOC728158	0.428294	3.69333	3.86132	0.956494	0.338823
FAM155A	0.428294	3.69333	3.86132	0.956494	0.338823
KIAA2012-AS1	0.428294	3.69333	3.86132	0.956494	0.338823
RPL12P18	0.428294	3.69333	3.86132	0.956494	0.338823
NUDT19P1	0.428294	3.69333	3.86132	0.956494	0.338823
ST13P12	0.428294	3.69333	3.86132	0.956494	0.338823
GTF3AP5	0.428294	3.69333	3.86132	0.956494	0.338823
LOC100129293	0.428294	3.69333	3.86132	0.956494	0.338823
FAM8A3P	0.428294	3.69333	3.86132	0.956494	0.338823
LOC100129774	0.428294	3.69333	3.86132	0.956494	0.338823
RPL26P15	0.428294	3.69333	3.86132	0.956494	0.338823
LINC00624	0.428294	3.69333	3.86132	0.956494	0.338823
RTRAFP2	0.428294	3.69333	3.86132	0.956494	0.338823
SLC9B1P3	0.428294	3.69333	3.86132	0.956494	0.338823
NCAPD2P1	0.428294	3.69333	3.86132	0.956494	0.338823
THRAP3P2	0.428294	3.69333	3.86132	0.956494	0.338823
LOC100422426	0.428294	3.69333	3.86132	0.956494	0.338823
ATP5MC1P6	0.428294	3.69333	3.86132	0.956494	0.338823
LINC01603	0.428294	3.69333	3.86132	0.956494	0.338823
LINC01532	0.428294	3.69333	3.86132	0.956494	0.338823
LOC100505851	0.428294	3.69333	3.86132	0.956494	0.338823
LOC100506497	0.428294	3.69333	3.86132	0.956494	0.338823
TMEM178B	0.428294	3.69333	3.86132	0.956494	0.338823
LINC00159	0.428294	3.69333	3.86132	0.956494	0.338823
LINC00446	0.428294	3.69333	3.86132	0.956494	0.338823
OSTCP6	0.428294	3.69333	3.86132	0.956494	0.338823
LINC00690	0.428294	3.69333	3.86132	0.956494	0.338823
LOC101926908	0.428294	3.69333	3.86132	0.956494	0.338823
LINC01358	0.428294	3.69333	3.86132	0.956494	0.338823
GNA14-AS1	0.428294	3.69333	3.86132	0.956494	0.338823
LINC02388	0.428294	3.69333	3.86132	0.956494	0.338823
LINC01429	0.428294	3.69333	3.86132	0.956494	0.338823
TH2LCRR	0.428294	3.69333	3.86132	0.956494	0.338823
LINC01847	0.428294	3.69333	3.86132	0.956494	0.338823
LOC101928051	0.428294	3.69333	3.86132	0.956494	0.338823
LINC01363	0.428294	3.69333	3.86132	0.956494	0.338823
LOC101928940	0.428294	3.69333	3.86132	0.956494	0.338823
LOC101929348	0.428294	3.69333	3.86132	0.956494	0.338823
LOC101929586	0.428294	3.69333	3.86132	0.956494	0.338823
ST3GAL3-AS1	0.428294	3.69333	3.86132	0.956494	0.338823
LINC01017	0.428294	3.69333	3.86132	0.956494	0.338823
LINC01340	0.428294	3.69333	3.86132	0.956494	0.338823
LOC102723876	0.428294	3.69333	3.86132	0.956494	0.338823
LOC102724520	0.428294	3.69333	3.86132	0.956494	0.338823
LOC102724768	0.428294	3.69333	3.86132	0.956494	0.338823
LOC105369409	0.428294	3.69333	3.86132	0.956494	0.338823
LOC105369451	0.428294	3.69333	3.86132	0.956494	0.338823
LOC105369507	0.428294	3.69333	3.86132	0.956494	0.338823
LOC105369885	0.428294	3.69333	3.86132	0.956494	0.338823
LOC105369925	0.428294	3.69333	3.86132	0.956494	0.338823
LOC105370196	0.428294	3.69333	3.86132	0.956494	0.338823
LOC105370217	0.428294	3.69333	3.86132	0.956494	0.338823
LOC105370240	0.428294	3.69333	3.86132	0.956494	0.338823
LOC105370327	0.428294	3.69333	3.86132	0.956494	0.338823
LOC105370455	0.428294	3.69333	3.86132	0.956494	0.338823
LOC105370599	0.428294	3.69333	3.86132	0.956494	0.338823
LOC105370809	0.428294	3.69333	3.86132	0.956494	0.338823
LOC105371024	0.428294	3.69333	3.86132	0.956494	0.338823
LOC105371259	0.428294	3.69333	3.86132	0.956494	0.338823
LOC105371536	0.428294	3.69333	3.86132	0.956494	0.338823
LOC105371735	0.428294	3.69333	3.86132	0.956494	0.338823
LOC105372016	0.428294	3.69333	3.86132	0.956494	0.338823
LOC105372325	0.428294	3.69333	3.86132	0.956494	0.338823
LOC105372528	0.428294	3.69333	3.86132	0.956494	0.338823
LOC105372575	0.428294	3.69333	3.86132	0.956494	0.338823
LOC105372586	0.428294	3.69333	3.86132	0.956494	0.338823
LOC105372798	0.428294	3.69333	3.86132	0.956494	0.338823
LOC105373369	0.428294	3.69333	3.86132	0.956494	0.338823
LOC105373595	0.428294	3.69333	3.86132	0.956494	0.338823
LOC105373795	0.428294	3.69333	3.86132	0.956494	0.338823
LOC105374154	0.428294	3.69333	3.86132	0.956494	0.338823
LOC105374386	0.428294	3.69333	3.86132	0.956494	0.338823
LOC105374481	0.428294	3.69333	3.86132	0.956494	0.338823
LINC02063	0.428294	3.69333	3.86132	0.956494	0.338823
LOC105374659	0.428294	3.69333	3.86132	0.956494	0.338823
LOC105374686	0.428294	3.69333	3.86132	0.956494	0.338823
LOC105374701	0.428294	3.69333	3.86132	0.956494	0.338823
LOC105375581	0.428294	3.69333	3.86132	0.956494	0.338823
LINC02710	0.428294	3.69333	3.86132	0.956494	0.338823
LOC105376675	0.428294	3.69333	3.86132	0.956494	0.338823
LOC105377271	0.428294	3.69333	3.86132	0.956494	0.338823
LOC105377473	0.428294	3.69333	3.86132	0.956494	0.338823
LOC105377489	0.428294	3.69333	3.86132	0.956494	0.338823
LOC105377490	0.428294	3.69333	3.86132	0.956494	0.338823
LOC105377519	0.428294	3.69333	3.86132	0.956494	0.338823
LOC105377702	0.428294	3.69333	3.86132	0.956494	0.338823
LOC105378211	0.428294	3.69333	3.86132	0.956494	0.338823
LOC105379266	0.428294	3.69333	3.86132	0.956494	0.338823
LOC107984213	0.428294	3.69333	3.86132	0.956494	0.338823
LOC107984255	0.428294	3.69333	3.86132	0.956494	0.338823
LOC107984508	0.428294	3.69333	3.86132	0.956494	0.338823
LOC107984547	0.428294	3.69333	3.86132	0.956494	0.338823
LOC107985135	0.428294	3.69333	3.86132	0.956494	0.338823
LOC107985141	0.428294	3.69333	3.86132	0.956494	0.338823
LOC107985883	0.428294	3.69333	3.86132	0.956494	0.338823
LOC107985906	0.428294	3.69333	3.86132	0.956494	0.338823
LOC107986028	0.428294	3.69333	3.86132	0.956494	0.338823
LOC107986138	0.428294	3.69333	3.86132	0.956494	0.338823
LOC107986416	0.428294	3.69333	3.86132	0.956494	0.338823
LOC107986885	0.428294	3.69333	3.86132	0.956494	0.338823
LOC107987056	0.428294	3.69333	3.86132	0.956494	0.338823
LOC107987123	0.428294	3.69333	3.86132	0.956494	0.338823
FAM236C	0.428294	3.69333	3.86132	0.956494	0.338823
LOC112268425	0.428294	3.69333	3.86132	0.956494	0.338823
ZNF816-ZNF321P	7.17711	3.68951	1.82637	2.02013	0.0433702
NLRP2B	1.0746	3.68942	2.98615	1.23551	0.216641
EHHADH	2.16668	3.68938	2.66577	1.38398	0.166363
PCAT18	5.27623	3.68091	1.93886	1.89849	0.057632
LOC102724687	1.89554	3.68042	2.27994	1.61426	0.106471
LOC105376204	3.343	3.67429	2.17371	1.69033	0.0909646
TSBP1-AS1	1.97284	3.6673	2.70674	1.35488	0.175457
TRPC3	4.24769	3.66682	1.53606	2.38715	0.0169796
GGT5	322.427	3.66524	0.983604	3.72634	0.000194281
AMOTL1	1.44004	3.65756	2.83973	1.288	0.197747
LOC102725116	1.79508	3.64825	2.30203	1.5848	0.113012
LOC100419037	1.0882	3.64474	3.08281	1.18228	0.237095
DDX11L8	0.803757	3.64381	3.33326	1.09317	0.27432
CALN1	1.11946	3.64285	2.95197	1.23404	0.217188
LOC641746	1.11946	3.64285	2.95197	1.23404	0.217188
KLHL1	1.11754	3.64281	3.6134	1.00814	0.313388
ACKR2	1.06438	3.64279	3.00183	1.21352	0.224929
LOC105372639	1.06417	3.64279	3.00203	1.21344	0.22496
LOC105376978	1.06417	3.64279	3.00203	1.21344	0.22496
LOC112268466	1.04736	3.64278	3.01796	1.20703	0.22742
OR9Q1	1.03143	3.64276	3.03339	1.20089	0.229794
ALK	0.851462	3.64197	3.84145	0.94807	0.343094
TRPV3	0.820421	3.64197	3.84145	0.94807	0.343094
RHPN2P1	0.792771	3.64197	3.84145	0.94807	0.343094
LOC105369491	0.851462	3.64197	3.84145	0.94807	0.343094
LOC105369771	0.792771	3.64197	3.84145	0.94807	0.343094
LOC105374520	0.851462	3.64197	3.84145	0.94807	0.343094
GSDMA	0.82674	3.64197	3.84145	0.94807	0.343094
LOC100133077	0.814742	3.64197	3.84145	0.94807	0.343094
LOC107986045	0.82674	3.64197	3.84145	0.94807	0.343094
GNG10P1	0.806098	3.64197	3.84145	0.94807	0.343094
KCNV1	2.34983	3.64102	2.69673	1.35016	0.176964
PCDH7	0.853381	3.64087	3.14956	1.15599	0.247684
LOC105374824	0.853381	3.64087	3.14956	1.15599	0.247684
LOC105378437	0.828659	3.64087	3.18198	1.14422	0.252534
RHOJ	0.81652	3.64087	3.1984	1.13834	0.254977
IL1RAPL1	0.808017	3.64087	3.21009	1.13419	0.256713
PRAMEF14	0.808017	3.64087	3.21009	1.13419	0.256713
LOC105370475	0.808017	3.64087	3.21009	1.13419	0.256713
LINC01697	1.12138	3.6404	2.98939	1.21777	0.22331
SPINK5	0.830578	3.63975	3.84152	0.947477	0.343396
BRD7P1	0.830578	3.63975	3.84152	0.947477	0.343396
LOC105379168	0.830578	3.63975	3.84152	0.947477	0.343396
LOC107987108	0.830578	3.63975	3.84152	0.947477	0.343396
LOC112268420	0.838678	3.63975	3.84152	0.947477	0.343396
LOC101928856	0.818439	3.63975	3.84152	0.947477	0.343396
LOC101928961	0.79661	3.63975	3.84152	0.947477	0.343396
LOC105370181	0.79661	3.63975	3.84152	0.947477	0.343396
LOC105370854	0.79661	3.63975	3.84152	0.947477	0.343396
LOC107985904	0.8553	3.63975	3.84152	0.947477	0.343396
LOC107986370	0.8553	3.63975	3.84152	0.947477	0.343396
LINC00989	0.80723	3.63975	3.84152	0.947477	0.343396
LOC105369710	0.80723	3.63975	3.84152	0.947477	0.343396
CHGB	0.809937	3.63975	3.84152	0.947477	0.343396
CYCSP19	0.809937	3.63975	3.84152	0.947477	0.343396
LOC100131395	1.05488	3.63886	2.59397	1.40281	0.160672
LOC102723564	1.96005	3.63183	2.33108	1.558	0.119232
NEFL	0.61263	3.62661	3.54155	1.02402	0.305827
PMCH	2.71915	3.6236	2.62486	1.3805	0.167434
RPL31P55	0.606238	3.62193	3.57213	1.01394	0.310612
DAOA-AS1	0.614549	3.62187	3.55532	1.01872	0.308336
FAM186A	2.32259	3.61844	2.69094	1.34468	0.17873
LOC105374737	2.05228	3.6181	1.96641	1.83995	0.0657753
OR2T8	1.37792	3.61611	2.1345	1.69413	0.0902414
CAVIN2-AS1	1.67817	3.61446	2.32356	1.55557	0.119811
RYR2	2.716	3.61008	1.49431	2.41589	0.0156969
ADGRB1	0.399127	3.60819	3.86491	0.933575	0.350523
CALB2	0.399127	3.60819	3.86491	0.933575	0.350523
KCNG1	0.399127	3.60819	3.86491	0.933575	0.350523
KCNJ10	0.399127	3.60819	3.86491	0.933575	0.350523
KCNK3	0.399127	3.60819	3.86491	0.933575	0.350523
PCK1	0.399127	3.60819	3.86491	0.933575	0.350523
AKAP4	0.399127	3.60819	3.86491	0.933575	0.350523
CXCL14	0.399127	3.60819	3.86491	0.933575	0.350523
TBC1D12	0.399127	3.60819	3.86491	0.933575	0.350523
MTCL1	0.399127	3.60819	3.86491	0.933575	0.350523
CLIC6	0.399127	3.60819	3.86491	0.933575	0.350523
HMGCLL1	0.399127	3.60819	3.86491	0.933575	0.350523
ANKRD7	0.399127	3.60819	3.86491	0.933575	0.350523
TTYH1	0.399127	3.60819	3.86491	0.933575	0.350523
LRTM1	0.399127	3.60819	3.86491	0.933575	0.350523
TRIM46	0.399127	3.60819	3.86491	0.933575	0.350523
TMEM177	0.399127	3.60819	3.86491	0.933575	0.350523
TTTY5	0.399127	3.60819	3.86491	0.933575	0.350523
TNS4	0.399127	3.60819	3.86491	0.933575	0.350523
RPLP1P7	0.399127	3.60819	3.86491	0.933575	0.350523
IGSF11	0.399127	3.60819	3.86491	0.933575	0.350523
PLEKHG4B	0.399127	3.60819	3.86491	0.933575	0.350523
FAM27E5	0.399127	3.60819	3.86491	0.933575	0.350523
DUPD1	0.399127	3.60819	3.86491	0.933575	0.350523
NANOGNB	0.399127	3.60819	3.86491	0.933575	0.350523
LOC400940	0.399127	3.60819	3.86491	0.933575	0.350523
DKFZp451B082	0.399127	3.60819	3.86491	0.933575	0.350523
LOC401767	0.399127	3.60819	3.86491	0.933575	0.350523
A1BG-AS1	0.399127	3.60819	3.86491	0.933575	0.350523
LOC643201	0.399127	3.60819	3.86491	0.933575	0.350523
RPL35P8	0.399127	3.60819	3.86491	0.933575	0.350523
NR2F2-AS1	0.399127	3.60819	3.86491	0.933575	0.350523
LHFPL3-AS1	0.399127	3.60819	3.86491	0.933575	0.350523
ZRF1PS	0.399127	3.60819	3.86491	0.933575	0.350523
FRMPD2B	0.399127	3.60819	3.86491	0.933575	0.350523
LOC100129168	0.399127	3.60819	3.86491	0.933575	0.350523
RPL30P3	0.399127	3.60819	3.86491	0.933575	0.350523
LNCOC1	0.399127	3.60819	3.86491	0.933575	0.350523
RBBP4P5	0.399127	3.60819	3.86491	0.933575	0.350523
CUBNP3	0.399127	3.60819	3.86491	0.933575	0.350523
LINC00673	0.399127	3.60819	3.86491	0.933575	0.350523
LINC00366	0.399127	3.60819	3.86491	0.933575	0.350523
LOC101060098	0.399127	3.60819	3.86491	0.933575	0.350523
GPR1-AS	0.399127	3.60819	3.86491	0.933575	0.350523
LOC101927019	0.399127	3.60819	3.86491	0.933575	0.350523
LOC101927072	0.399127	3.60819	3.86491	0.933575	0.350523
RPSAP69	0.399127	3.60819	3.86491	0.933575	0.350523
LINC02075	0.399127	3.60819	3.86491	0.933575	0.350523
LINC01103	0.399127	3.60819	3.86491	0.933575	0.350523
ACSL6-AS1	0.399127	3.60819	3.86491	0.933575	0.350523
LINC01985	0.399127	3.60819	3.86491	0.933575	0.350523
LOC101928193	0.399127	3.60819	3.86491	0.933575	0.350523
LINC02334	0.399127	3.60819	3.86491	0.933575	0.350523
MIR7975	0.399127	3.60819	3.86491	0.933575	0.350523
LOC102723657	0.399127	3.60819	3.86491	0.933575	0.350523
LOC102724087	0.399127	3.60819	3.86491	0.933575	0.350523
LOC105369552	0.399127	3.60819	3.86491	0.933575	0.350523
LOC105369927	0.399127	3.60819	3.86491	0.933575	0.350523
LOC105369990	0.399127	3.60819	3.86491	0.933575	0.350523
LOC105370406	0.399127	3.60819	3.86491	0.933575	0.350523
LOC105370600	0.399127	3.60819	3.86491	0.933575	0.350523
LOC105370680	0.399127	3.60819	3.86491	0.933575	0.350523
LOC105371419	0.399127	3.60819	3.86491	0.933575	0.350523
LOC105371974	0.399127	3.60819	3.86491	0.933575	0.350523
LOC105372100	0.399127	3.60819	3.86491	0.933575	0.350523
LOC105372529	0.399127	3.60819	3.86491	0.933575	0.350523
LOC105372645	0.399127	3.60819	3.86491	0.933575	0.350523
LOC105372661	0.399127	3.60819	3.86491	0.933575	0.350523
LOC105372790	0.399127	3.60819	3.86491	0.933575	0.350523
LINC02558	0.399127	3.60819	3.86491	0.933575	0.350523
LOC105373100	0.399127	3.60819	3.86491	0.933575	0.350523
LOC105373504	0.399127	3.60819	3.86491	0.933575	0.350523
LOC105373891	0.399127	3.60819	3.86491	0.933575	0.350523
LOC105373949	0.399127	3.60819	3.86491	0.933575	0.350523
LOC105374803	0.399127	3.60819	3.86491	0.933575	0.350523
LOC105375450	0.399127	3.60819	3.86491	0.933575	0.350523
LOC105375544	0.399127	3.60819	3.86491	0.933575	0.350523
LOC105375588	0.399127	3.60819	3.86491	0.933575	0.350523
LOC105375901	0.399127	3.60819	3.86491	0.933575	0.350523
LOC105376177	0.399127	3.60819	3.86491	0.933575	0.350523
LOC105376718	0.399127	3.60819	3.86491	0.933575	0.350523
LOC105376812	0.399127	3.60819	3.86491	0.933575	0.350523
LOC105376826	0.399127	3.60819	3.86491	0.933575	0.350523
LOC105377125	0.399127	3.60819	3.86491	0.933575	0.350523
LOC105377944	0.399127	3.60819	3.86491	0.933575	0.350523
LOC105379144	0.399127	3.60819	3.86491	0.933575	0.350523
LOC105379514	0.399127	3.60819	3.86491	0.933575	0.350523
RN7SL229P	0.399127	3.60819	3.86491	0.933575	0.350523
LOC107984535	0.399127	3.60819	3.86491	0.933575	0.350523
LOC107985091	0.399127	3.60819	3.86491	0.933575	0.350523
LOC107986021	0.399127	3.60819	3.86491	0.933575	0.350523
LOC107986419	0.399127	3.60819	3.86491	0.933575	0.350523
LOC107986541	0.399127	3.60819	3.86491	0.933575	0.350523
LOC107986891	0.399127	3.60819	3.86491	0.933575	0.350523
LOC112267974	0.399127	3.60819	3.86491	0.933575	0.350523
CLIC4P2	0.401046	3.60142	3.86521	0.931754	0.351464
RPS3AP9	0.401046	3.60142	3.86521	0.931754	0.351464
RPL18AP12	0.401046	3.60142	3.86521	0.931754	0.351464
RBM22P4	0.401046	3.60142	3.86521	0.931754	0.351464
YPEL5P3	0.401046	3.60142	3.86521	0.931754	0.351464
LOC102724740	2.67915	3.59397	1.87364	1.91818	0.0550887
LOC105373696	1.02609	3.59218	3.05029	1.17765	0.238935
LOC105377789	1.47957	3.59084	2.8411	1.26389	0.206269
LOC100422194	1.33747	3.58194	2.4213	1.47934	0.139049
MCFD2P1	0.826133	3.58067	3.19895	1.11933	0.263001
PCARE	0.80951	3.58063	3.22156	1.11146	0.26637
GPR179	0.801411	3.58062	3.23279	1.10759	0.268038
CLEC14A	0.789413	3.58059	3.24972	1.10181	0.270542
LOC283172	0.789413	3.58059	3.24972	1.10181	0.270542
PCDH20	0.780769	3.58057	3.26214	1.09761	0.272373
HMGA2	0.767442	3.58054	3.28167	1.09107	0.275241
LOC107984805	3.05808	3.57926	2.18209	1.64029	0.100945
GABRA5	1.29865	3.57914	3.55685	1.00627	0.314288
CNTNAP4	1.29865	3.57914	3.55685	1.00627	0.314288
PRICKLE2	1.38938	3.57907	3.51621	1.01788	0.308736
PRSS37	1.31402	3.57888	2.90018	1.23402	0.217196
LOC101929340	1.66724	3.57764	2.37793	1.50452	0.132448
LOC105377329	2.11295	3.57665	2.27979	1.56885	0.116683
LOC107986365	0.797331	3.57475	2.83322	1.26173	0.207047
HS3ST5	1.70532	3.57472	2.3339	1.53165	0.125608
STK32A-AS1	3.03973	3.57422	2.61042	1.36921	0.170933
LOC107984433	1.61624	3.56958	2.81654	1.26736	0.205025
PRTG	3.01056	3.55559	2.63116	1.35134	0.176586
LOC105376004	4.01695	3.55279	2.18652	1.62486	0.104193
MTUS2	0.5627	3.54926	3.85452	0.920806	0.357152
KRT8P45	0.569861	3.54926	3.85452	0.920806	0.357152
SMIM11P1	0.573021	3.54926	3.85452	0.920806	0.357152
LOC105369957	0.5627	3.54926	3.85452	0.920806	0.357152
TMPRSS11A	0.585382	3.54926	3.85452	0.920806	0.357152
POTEA	0.585382	3.54926	3.85452	0.920806	0.357152
SPATA31C1	0.585382	3.54926	3.85452	0.920806	0.357152
HSPD1P9	0.566951	3.54926	3.85452	0.920806	0.357152
EYA1	3.07884	3.54858	2.21646	1.60101	0.109375
LOC105379025	1.26282	3.54713	2.48843	1.42545	0.154027
EEF1A1P16	1.79636	3.54525	2.533	1.39963	0.161625
LOC105374816	0.557956	3.54515	3.62937	0.976795	0.328671
RPL22P20	0.564619	3.54512	3.61405	0.980928	0.326628
LOC105374164	0.57178	3.5451	3.59787	0.985333	0.32446
NANOGP4	0.57899	3.54507	3.58186	0.989729	0.322306
PSG5	0.587301	3.54504	3.56375	0.994751	0.319857
LOC100507387	0.587301	3.54504	3.56375	0.994751	0.319857
FSTL1	0.996919	3.54462	3.1427	1.12789	0.259366
TANC1	3.17721	3.54287	1.85791	1.90691	0.0565321
AGR3	0.998839	3.54223	3.0668	1.15502	0.248081
APCDD1	1.0118	3.54222	3.05367	1.15999	0.246054
LOC102724253	1.06688	3.54218	3.00033	1.18059	0.237764
CENPI	1.00076	3.54212	3.76427	0.940985	0.346713
LINC02673	1.00076	3.54212	3.76427	0.940985	0.346713
GABRA6	1.01351	3.54208	3.7487	0.944882	0.344719
HMX3	1.01351	3.54208	3.7487	0.944882	0.344719
WFDC21P	1.02224	3.54205	3.7382	0.947528	0.34337
LOC107986454	1.02224	3.54205	3.7382	0.947528	0.34337
LOC105373794	1.27789	3.54198	2.51621	1.40766	0.159231
RPL30P14	1.0688	3.5419	3.68427	0.961356	0.336373
LOC105374493	1.0688	3.5419	3.68427	0.961356	0.336373
LOC105376368	1.0688	3.5419	3.68427	0.961356	0.336373
HNRNPA1P62	1.00748	3.54177	2.58963	1.36767	0.171415
LOC107985061	1.01948	3.54176	2.57984	1.37286	0.169796
OR1N1	1.04285	3.54173	2.56121	1.38283	0.166715
PABPC1P12	1.35829	3.54014	2.92985	1.2083	0.226931
TOP1P2	1.05037	3.53991	3.14147	1.12683	0.259814
LOC107986936	1.05644	3.53988	3.13541	1.129	0.258898
LOC105372328	1.36021	3.53863	2.89558	1.22208	0.221678
LOC107986007	1.31077	3.53863	2.89914	1.22058	0.222246
TARDBPP2	1.00867	3.53762	2.75227	1.28535	0.198671
LOC107986813	2.24468	3.53411	3.27164	1.08023	0.280042
LOC105377989	3.8613	3.53348	1.83873	1.9217	0.054644
CD40	7.75858	3.53297	3.52983	1.00089	0.31688
LINC00472	1.83852	3.52493	2.77592	1.26982	0.204147
C3AR1	1911.62	3.51786	1.16792	3.01208	0.00259462
LOC100130854	0.798885	3.51778	3.28612	1.0705	0.284396
PRKG1	1.2265	3.51763	2.51107	1.40085	0.161259
DIO2	2.39713	3.51563	2.24468	1.5662	0.117301
SPTSSB	2.05857	3.51473	2.74108	1.28224	0.199758
LINC02275	0.742113	3.51369	3.3339	1.05393	0.291916
LOC105378504	0.742113	3.51369	3.3339	1.05393	0.291916
UGT2A3	0.75544	3.51364	3.31353	1.06039	0.288967
LOC105370839	0.769763	3.51359	3.2922	1.06725	0.285859
LOC107984766	0.800804	3.51349	3.24775	1.08182	0.279332
SLC13A1	1.61274	3.51309	2.36551	1.48513	0.137509
ATP8B5P	0.782444	3.51206	2.79112	1.2583	0.208284
FKBP1AP2	0.373798	3.50375	3.8696	0.905454	0.365225
FOXC2	0.373798	3.50375	3.8696	0.905454	0.365225
GATA4	0.373798	3.50375	3.8696	0.905454	0.365225
SCGB2A2	0.373798	3.50375	3.8696	0.905454	0.365225
SELE	0.373798	3.50375	3.8696	0.905454	0.365225
BBOX1	0.373798	3.50375	3.8696	0.905454	0.365225
TNFSF11	0.373798	3.50375	3.8696	0.905454	0.365225
OR2L1P	0.373798	3.50375	3.8696	0.905454	0.365225
PCDHB17P	0.373798	3.50375	3.8696	0.905454	0.365225
ADGRG7	0.373798	3.50375	3.8696	0.905454	0.365225
FBXO27	0.373798	3.50375	3.8696	0.905454	0.365225
CD300LG	0.373798	3.50375	3.8696	0.905454	0.365225
CHORDC1P5	0.373798	3.50375	3.8696	0.905454	0.365225
OR6Y1	0.373798	3.50375	3.8696	0.905454	0.365225
LINC01168	0.373798	3.50375	3.8696	0.905454	0.365225
OR14I1	0.373798	3.50375	3.8696	0.905454	0.365225
KRT19P3	0.373798	3.50375	3.8696	0.905454	0.365225
HNRNPA1P1	0.373798	3.50375	3.8696	0.905454	0.365225
RPS7P15	0.373798	3.50375	3.8696	0.905454	0.365225
LOC100126784	0.373798	3.50375	3.8696	0.905454	0.365225
KIAA0895LP1	0.373798	3.50375	3.8696	0.905454	0.365225
RBM22P3	0.373798	3.50375	3.8696	0.905454	0.365225
EI24P2	0.373798	3.50375	3.8696	0.905454	0.365225
BSPH1	0.373798	3.50375	3.8696	0.905454	0.365225
ZNF114P1	0.373798	3.50375	3.8696	0.905454	0.365225
RPL35AP33	0.373798	3.50375	3.8696	0.905454	0.365225
LOC100289320	0.373798	3.50375	3.8696	0.905454	0.365225
LOC100420800	0.373798	3.50375	3.8696	0.905454	0.365225
MIR4501	0.373798	3.50375	3.8696	0.905454	0.365225
LOC102467080	0.373798	3.50375	3.8696	0.905454	0.365225
LOC105370478	0.373798	3.50375	3.8696	0.905454	0.365225
LOC105372594	0.373798	3.50375	3.8696	0.905454	0.365225
LOC105372896	0.373798	3.50375	3.8696	0.905454	0.365225
LOC105373932	0.373798	3.50375	3.8696	0.905454	0.365225
LINC01955	0.373798	3.50375	3.8696	0.905454	0.365225
LOC105375520	0.373798	3.50375	3.8696	0.905454	0.365225
LOC105377485	0.373798	3.50375	3.8696	0.905454	0.365225
LOC105379829	0.373798	3.50375	3.8696	0.905454	0.365225
RNU2-14P	0.373798	3.50375	3.8696	0.905454	0.365225
LOC107986183	0.373798	3.50375	3.8696	0.905454	0.365225
LOC107987079	0.373798	3.50375	3.8696	0.905454	0.365225
LOC107984007	1.2824	3.4994	1.91451	1.82783	0.0675756
LOC105377785	1.78353	3.49886	2.76939	1.26341	0.206444
LOC105378697	1.33296	3.49728	2.91392	1.2002	0.230062
ZNF462	1.24224	3.49725	2.94102	1.18913	0.23439
FMO2	1.03772	3.49109	3.6989	0.94382	0.345262
AFAP1-AS1	0.965611	3.49085	3.78589	0.922067	0.356493
LOC642366	1.03964	3.4906	3.02806	1.15275	0.249013
ACTBL2	0.97159	3.49056	3.09699	1.12708	0.259708
MACROD2	0.996192	3.48571	2.70127	1.29039	0.196914
LOC389602	1.68797	3.48253	3.39782	1.02493	0.305395
LOC105369435	2.00057	3.48046	2.34888	1.48175	0.138407
LOC100134868	0.547692	3.4642	3.648	0.949616	0.342307
OR2A1	0.541622	3.4642	3.66258	0.945837	0.344232
GPC5-AS1	0.536018	3.4642	3.67624	0.942321	0.346028
RELN	2.88199	3.46357	2.65782	1.30316	0.192519
GJB2	23.6697	3.46286	2.03479	1.70183	0.0887875
LOC645202	1.29336	3.45601	2.50492	1.37969	0.167683
LINC02594	1.25435	3.45379	3.57761	0.965388	0.33435
LINC02806	0.746915	3.45007	3.84706	0.896807	0.369822
SHC4	0.746915	3.45007	3.84706	0.896807	0.369822
LINC01548	0.740596	3.45007	3.84706	0.896807	0.369822
TMEM238L	0.723566	3.45007	3.84706	0.896807	0.369822
LOC105373499	0.771636	3.45007	3.84706	0.896807	0.369822
LOC105373724	0.726273	3.45007	3.84706	0.896807	0.369822
LINC02476	0.771636	3.45007	3.84706	0.896807	0.369822
LINC02780	0.740596	3.45007	3.84706	0.896807	0.369822
LOC105377882	0.726273	3.45007	3.84706	0.896807	0.369822
LOC107985534	0.771636	3.45007	3.84706	0.896807	0.369822
LOC107986222	0.771636	3.45007	3.84706	0.896807	0.369822
LOC107986450	0.734916	3.45007	3.84706	0.896807	0.369822
LOC105378848	0.728192	3.44766	3.33884	1.03259	0.301795
KCNQ4	0.742515	3.44764	3.31629	1.03961	0.298522
LOC100129037	0.742515	3.44764	3.31629	1.03961	0.298522
RPL39P24	0.755196	3.44714	2.80471	1.22905	0.219052
AMER2	2.49958	3.44272	1.90148	1.81055	0.0702104
LOC102724081	2.40429	3.44074	2.31267	1.48778	0.13681
LOC105376182	1.80925	3.44062	2.31822	1.48416	0.137766
LOC100131216	0.995765	3.43837	2.62126	1.31172	0.189614
ZFPM2	0.975305	3.43708	3.11068	1.10493	0.269191
KCND2	0.924352	3.43697	3.16623	1.08551	0.277696
RPEL1	3.67035	3.43646	1.39187	2.46896	0.0135505
LOC107986109	0.977224	3.43393	3.12408	1.09918	0.271689
LOC101927414	1.01431	3.43382	3.08638	1.11257	0.265892
LOC105374988	1.01431	3.43382	3.08638	1.11257	0.265892
LOC105376585	1.01431	3.43382	3.08638	1.11257	0.265892
STXBP6	3.26701	3.43324	2.21441	1.55041	0.121043
MAGI2	2.8917	3.43169	1.89301	1.81282	0.0698595
LOC100533678	1.17441	3.42764	2.54474	1.34695	0.177995
PRKAA2	4.68556	3.42485	2.20618	1.55239	0.12057
LOC100144595	2.8275	3.42484	2.66256	1.2863	0.19834
KCNN2	1.19889	3.4237	3.06742	1.11615	0.264357
XKR4	4.03497	3.41881	1.65088	2.0709	0.0383684
LOC105375846	1.82595	3.41505	2.87326	1.18856	0.234611
ADAMTS17	1.9668	3.4133	2.78041	1.22762	0.219589
NRP2	1.18617	3.40888	3.65373	0.932986	0.350827
LOC105373485	1.19158	3.40887	3.64857	0.934304	0.350147
LOC100130049	1.28231	3.40877	3.5989	0.947171	0.343552
LOC105376922	1.28231	3.40877	3.5989	0.947171	0.343552
FAXC	1.2184	3.40873	2.49191	1.36792	0.171337
LOC105377864	1.23502	3.40872	2.48397	1.37229	0.169974
PLCB4	2.95366	3.40798	1.91409	1.78046	0.0750002
LOC102724416	4.31569	3.40249	1.60267	2.12302	0.0337519
CRYAB	0.34655	3.39963	3.87463	0.877408	0.380265
SASH1	0.34655	3.39963	3.87463	0.877408	0.380265
OR10T2	0.34655	3.39963	3.87463	0.877408	0.380265
TAF13P1	0.34655	3.39963	3.87463	0.877408	0.380265
COLCA1	0.34655	3.39963	3.87463	0.877408	0.380265
POTEKP	0.34655	3.39963	3.87463	0.877408	0.380265
RBMXP4	0.34655	3.39963	3.87463	0.877408	0.380265
LLPHP2	0.34655	3.39963	3.87463	0.877408	0.380265
CH507-145C22.1	2.18524	3.39841	1.78915	1.89945	0.0575052
ZNF793	2.61277	3.39381	2.26496	1.4984	0.13403
RNU6-60P	40.1428	3.3861	0.835102	4.05471	5.01965e-05
ONECUT2	2.37019	3.38164	2.28857	1.47762	0.139509
LINC01224	1.84106	3.38142	2.37335	1.42475	0.15423
AKR1B10P1	0.746308	3.37873	3.31703	1.0186	0.308393
LOC101929528	0.746308	3.37873	3.31703	1.0186	0.308393
LOC105373447	0.746308	3.37873	3.31703	1.0186	0.308393
LOC107985391	0.746308	3.37873	3.31703	1.0186	0.308393
LOC105374802	0.721586	3.37869	3.35599	1.00676	0.314049
ABCG8	0.715267	3.37868	3.36625	1.00369	0.315527
BTF3P4	0.715267	3.37868	3.36625	1.00369	0.315527
LOC107985256	0.709446	3.37867	3.37581	1.00085	0.316901
LOC105372524	0.687617	3.37863	3.41266	0.990029	0.32216
C2orf69P1	1.75674	3.3785	2.35842	1.43253	0.151993
RPL12P12	0.926673	3.37727	2.67362	1.26318	0.206524
LOC100130990	0.963024	3.37719	2.64113	1.27869	0.201007
TSPAN8	0.748227	3.37565	3.84944	0.876919	0.380531
NKAIN1	0.748227	3.37565	3.84944	0.876919	0.380531
CLRN3	0.717186	3.37565	3.84944	0.876919	0.380531
TMEM74	0.702863	3.37565	3.84944	0.876919	0.380531
ZDHHC15	0.748227	3.37565	3.84944	0.876919	0.380531
SLC30A8	0.748227	3.37565	3.84944	0.876919	0.380531
OR4K3	0.689536	3.37565	3.84944	0.876919	0.380531
CDKL4	0.717186	3.37565	3.84944	0.876919	0.380531
ANKRD18B	0.717186	3.37565	3.84944	0.876919	0.380531
HMGN1P11	0.748227	3.37565	3.84944	0.876919	0.380531
OTX2-AS1	0.748227	3.37565	3.84944	0.876919	0.380531
LINC01606	0.748227	3.37565	3.84944	0.876919	0.380531
LOC105369938	0.689536	3.37565	3.84944	0.876919	0.380531
LOC105374323	0.748227	3.37565	3.84944	0.876919	0.380531
LOC105375894	0.748227	3.37565	3.84944	0.876919	0.380531
LOC105378641	0.700157	3.37565	3.84944	0.876919	0.380531
LOC107985427	0.702863	3.37565	3.84944	0.876919	0.380531
LOC107986205	0.748227	3.37565	3.84944	0.876919	0.380531
LOC107986472	0.689536	3.37565	3.84944	0.876919	0.380531
LOC105373494	0.723505	3.37565	3.84944	0.876919	0.380531
LOC105378979	1.82063	3.3755	2.78617	1.21152	0.225696
COCH	24.7276	3.37483	1.3075	2.58113	0.00984785
LOC646801	0.526412	3.37274	3.86132	0.873467	0.382408
LOC390739	0.519203	3.37274	3.86132	0.873467	0.382408
LINC00960	0.534724	3.37274	3.86132	0.873467	0.382408
LOC101929943	0.516364	3.37274	3.86132	0.873467	0.382408
LOC105378242	0.516364	3.37274	3.86132	0.873467	0.382408
NCOA4P4	1.21179	3.36417	2.4973	1.34712	0.177941
SYT14	2.74959	3.36411	2.70966	1.24153	0.214411
FAM184A	1.16241	3.36369	3.00908	1.11785	0.263632
PREX2	3.09166	3.36305	2.65792	1.2653	0.205765
TRMT9B	1.85349	3.36227	2.36429	1.42211	0.154995
LOC100132004	1.5478	3.36116	2.95282	1.13829	0.255001
CABP1	1.45467	3.35867	2.89172	1.16148	0.245447
COL19A1	2.30669	3.35524	2.40551	1.39482	0.163071
LOC730100	2.30345	3.35294	1.98697	1.68746	0.091514
LOC105376011	2.44895	3.34458	1.97964	1.68948	0.0911268
CGNL1	1.91075	3.34411	2.07489	1.6117	0.107027
LOC105377470	2.72234	3.34365	2.70651	1.23541	0.216678
LOC107984203	1.37382	3.34351	2.62991	1.27134	0.203608
LOC724105	1.63994	3.34315	2.51205	1.33084	0.18324
CDH18	2.79523	3.34138	1.92947	1.73176	0.0833165
PRDX6-AS1	12.7355	3.33896	1.54163	2.16587	0.0303213
ZNF311	2.54179	3.33828	2.26858	1.47153	0.141148
LOC105369919	2.44472	3.33567	2.29909	1.45087	0.146817
INTU	7.15603	3.33394	1.63107	2.04402	0.0409519
NWD1	1.3824	3.33373	3.55723	0.93717	0.348671
LOC102724749	5.31312	3.33161	1.91631	1.73856	0.0821126
LOC101928041	3.02534	3.32864	2.23353	1.4903	0.136144
RBBP6P1	1.19655	3.32668	2.54251	1.30843	0.190729
LINC01873	1.38012	3.32539	2.45837	1.35268	0.176157
NBEAP1	1.56232	3.32397	2.41811	1.37462	0.16925
HNRNPA1P30	0.898348	3.32352	3.26744	1.01716	0.309075
USP17L15	3.49592	3.32269	1.21112	2.74348	0.00607917
POU6F2	0.957891	3.32152	3.7928	0.875743	0.38117
LINC02671	0.957891	3.32152	3.7928	0.875743	0.38117
MYT1	0.889846	3.32137	3.84145	0.864613	0.387251
INMT	0.902599	3.32137	3.84145	0.864613	0.387251
E2F7	0.902599	3.32137	3.84145	0.864613	0.387251
PEAR1	0.902811	3.32137	3.84145	0.864613	0.387251
LOC100288637	0.902599	3.32137	3.84145	0.864613	0.387251
LOC105376454	0.920809	3.32137	3.84145	0.864613	0.387251
RGPD4-AS1	0.959811	3.32028	3.11497	1.06591	0.286464
LOC105378027	0.88276	3.32028	2.71004	1.22518	0.220509
LOC105377017	0.90473	3.32028	3.17677	1.04517	0.295943
MIR3168	0.887705	3.32028	3.19694	1.03858	0.299
NR2F2	0.871775	3.32028	3.21629	1.03233	0.301918
LOC105375038	0.906649	3.31916	3.84152	0.864022	0.387576
LOC107985270	0.889625	3.31916	3.84152	0.864022	0.387576
LINC02402	0.893684	3.31916	3.84152	0.864022	0.387576
LOC105373734	0.893684	3.31916	3.84152	0.864022	0.387576
LOC100132009	0.936796	3.31916	3.84152	0.864022	0.387576
GRID1	0.924647	3.31916	3.84152	0.864022	0.387576
PCDHGB6	0.924647	3.31916	3.84152	0.864022	0.387576
LOC105379418	0.924647	3.31916	3.84152	0.864022	0.387576
CFHR4	0.96173	3.31906	3.80779	0.871648	0.3834
OR8D2	0.96173	3.31906	3.80779	0.871648	0.3834
SAMM50P1	0.96173	3.31906	3.80779	0.871648	0.3834
LOC105377174	0.96173	3.31906	3.80779	0.871648	0.3834
LOC112268227	0.96173	3.31906	3.80779	0.871648	0.3834
CLNS1AP1	0.892331	3.31713	3.29592	1.00643	0.314207
LOC107986082	1.19265	3.31707	3.00038	1.10555	0.268922
FOXF1	1.12783	3.31636	3.69028	0.898674	0.368826
GUCY1A2	2.77025	3.31536	1.94884	1.70119	0.0889069
ARMC8P1	1.22781	3.31478	3.03539	1.09204	0.274813
RPL9P17	0.937898	3.31412	2.80644	1.1809	0.237643
LOC105378046	2.6423	3.31405	1.9069	1.73793	0.0822237
ZFP2	1.20513	3.31356	2.58838	1.28017	0.200487
C9orf47	10.0953	3.31249	1.5018	2.20567	0.0274068
IMPA1P1	1.62388	3.30695	2.85188	1.15957	0.246224
AK4P6	0.719059	3.30641	3.40461	0.971156	0.331471
CYP7B1	3.5862	3.30615	1.90781	1.73296	0.0831036
CTNNA3	0.660369	3.30611	3.50456	0.943376	0.345489
LOC101929770	1.88254	3.305	2.35035	1.40617	0.159673
ERVV-1	1.7592	3.30452	1.64161	2.01297	0.0441174
LOC105378976	2.83327	3.30356	1.91876	1.72172	0.0851208
DNAH5	4.69631	3.30038	1.94252	1.69902	0.0893148
NT5M	1.43772	3.29956	2.47021	1.33574	0.181633
LOC107984800	1.65354	3.29939	2.85745	1.15466	0.24823
KITLG	1.39537	3.29928	3.0024	1.09888	0.271821
CES1	6.56669	3.29559	3.39731	0.970059	0.332017
SLCO1A2	2.25682	3.29288	1.97215	1.66969	0.0949801
ABCB10P3	1.53792	3.2922	2.15968	1.52439	0.127411
SPATA17	2.24476	3.29186	2.3885	1.37821	0.168137
BNC1	0.319301	3.28826	3.88041	0.847399	0.396772
BTC	0.319301	3.28826	3.88041	0.847399	0.396772
CA3	0.319301	3.28826	3.88041	0.847399	0.396772
CLK2P1	0.319301	3.28826	3.88041	0.847399	0.396772
DNMT3B	0.319301	3.28826	3.88041	0.847399	0.396772
KCNJ8	0.319301	3.28826	3.88041	0.847399	0.396772
KRT84	0.319301	3.28826	3.88041	0.847399	0.396772
MAGEB3	0.319301	3.28826	3.88041	0.847399	0.396772
MEP1A	0.319301	3.28826	3.88041	0.847399	0.396772
MSX2	0.319301	3.28826	3.88041	0.847399	0.396772
MYH8	0.319301	3.28826	3.88041	0.847399	0.396772
NPY1R	0.319301	3.28826	3.88041	0.847399	0.396772
OPCML	0.319301	3.28826	3.88041	0.847399	0.396772
PAX7	0.319301	3.28826	3.88041	0.847399	0.396772
VIT	0.319301	3.28826	3.88041	0.847399	0.396772
PTPRF	0.319301	3.28826	3.88041	0.847399	0.396772
SOX1	0.319301	3.28826	3.88041	0.847399	0.396772
TUB	0.319301	3.28826	3.88041	0.847399	0.396772
FGF23	0.319301	3.28826	3.88041	0.847399	0.396772
MYLKP1	0.319301	3.28826	3.88041	0.847399	0.396772
SORCS3	0.319301	3.28826	3.88041	0.847399	0.396772
RIMBP2	0.319301	3.28826	3.88041	0.847399	0.396772
OR2L2	0.319301	3.28826	3.88041	0.847399	0.396772
PCA3	0.319301	3.28826	3.88041	0.847399	0.396772
ST8SIA3	0.319301	3.28826	3.88041	0.847399	0.396772
CLDN18	0.319301	3.28826	3.88041	0.847399	0.396772
UGT2B26P	0.319301	3.28826	3.88041	0.847399	0.396772
LGALS14	0.319301	3.28826	3.88041	0.847399	0.396772
DSCAML1	0.319301	3.28826	3.88041	0.847399	0.396772
DUSP26	0.319301	3.28826	3.88041	0.847399	0.396772
DCSTAMP	0.319301	3.28826	3.88041	0.847399	0.396772
STMN4	0.319301	3.28826	3.88041	0.847399	0.396772
BRSK1	0.319301	3.28826	3.88041	0.847399	0.396772
RAPGEF4-AS1	0.319301	3.28826	3.88041	0.847399	0.396772
SLC26A9	0.319301	3.28826	3.88041	0.847399	0.396772
TM4SF18	0.319301	3.28826	3.88041	0.847399	0.396772
ANKRD13B	0.319301	3.28826	3.88041	0.847399	0.396772
OR1I1	0.319301	3.28826	3.88041	0.847399	0.396772
ZNF648	0.319301	3.28826	3.88041	0.847399	0.396772
SSC4D	0.319301	3.28826	3.88041	0.847399	0.396772
ANKRD60	0.319301	3.28826	3.88041	0.847399	0.396772
PWAR1	0.319301	3.28826	3.88041	0.847399	0.396772
KIF18B	0.319301	3.28826	3.88041	0.847399	0.396772
FAM163A	0.319301	3.28826	3.88041	0.847399	0.396772
STOML3	0.319301	3.28826	3.88041	0.847399	0.396772
DNAJB8	0.319301	3.28826	3.88041	0.847399	0.396772
TRIM60	0.319301	3.28826	3.88041	0.847399	0.396772
ADAMTS18	0.319301	3.28826	3.88041	0.847399	0.396772
EBF3	0.319301	3.28826	3.88041	0.847399	0.396772
NPNT	0.319301	3.28826	3.88041	0.847399	0.396772
ANKRD31	0.319301	3.28826	3.88041	0.847399	0.396772
HMCN2	0.319301	3.28826	3.88041	0.847399	0.396772
SIAH3	0.319301	3.28826	3.88041	0.847399	0.396772
BOD1L2	0.319301	3.28826	3.88041	0.847399	0.396772
KRTAP8-1	0.319301	3.28826	3.88041	0.847399	0.396772
BLACE	0.319301	3.28826	3.88041	0.847399	0.396772
LOC343508	0.319301	3.28826	3.88041	0.847399	0.396772
GPR153	0.319301	3.28826	3.88041	0.847399	0.396772
RPL7P48	0.319301	3.28826	3.88041	0.847399	0.396772
GDF6	0.319301	3.28826	3.88041	0.847399	0.396772
RPL6P29	0.319301	3.28826	3.88041	0.847399	0.396772
LINC02687	0.319301	3.28826	3.88041	0.847399	0.396772
LOC401040	0.319301	3.28826	3.88041	0.847399	0.396772
LOC440181	0.319301	3.28826	3.88041	0.847399	0.396772
SLC2A1-AS1	0.319301	3.28826	3.88041	0.847399	0.396772
MAP1LC3C	0.319301	3.28826	3.88041	0.847399	0.396772
ZNF716	0.319301	3.28826	3.88041	0.847399	0.396772
SLC25A51P4	0.319301	3.28826	3.88041	0.847399	0.396772
DPY19L2P1	0.319301	3.28826	3.88041	0.847399	0.396772
KRT18P23	0.319301	3.28826	3.88041	0.847399	0.396772
LOC644661	0.319301	3.28826	3.88041	0.847399	0.396772
MEMO1P2	0.319301	3.28826	3.88041	0.847399	0.396772
RPL3P3	0.319301	3.28826	3.88041	0.847399	0.396772
AGPAT5P1	0.319301	3.28826	3.88041	0.847399	0.396772
CLIC4P1	0.319301	3.28826	3.88041	0.847399	0.396772
LOC649166	0.319301	3.28826	3.88041	0.847399	0.396772
LRRC37A5P	0.319301	3.28826	3.88041	0.847399	0.396772
MIR449B	0.319301	3.28826	3.88041	0.847399	0.396772
LINC02203	0.319301	3.28826	3.88041	0.847399	0.396772
CROCC2	0.319301	3.28826	3.88041	0.847399	0.396772
RPS18P3	0.319301	3.28826	3.88041	0.847399	0.396772
DLG5-AS1	0.319301	3.28826	3.88041	0.847399	0.396772
DNAJB12P1	0.319301	3.28826	3.88041	0.847399	0.396772
RPL5P28	0.319301	3.28826	3.88041	0.847399	0.396772
RBM22P5	0.319301	3.28826	3.88041	0.847399	0.396772
MTHFD2P1	0.319301	3.28826	3.88041	0.847399	0.396772
CCT7P2	0.319301	3.28826	3.88041	0.847399	0.396772
AGGF1P10	0.319301	3.28826	3.88041	0.847399	0.396772
LOC100419923	0.319301	3.28826	3.88041	0.847399	0.396772
KATNBL1P3	0.319301	3.28826	3.88041	0.847399	0.396772
ACSM5P1	0.319301	3.28826	3.88041	0.847399	0.396772
LOC100421802	0.319301	3.28826	3.88041	0.847399	0.396772
TEX48	0.319301	3.28826	3.88041	0.847399	0.396772
LOC100505685	0.319301	3.28826	3.88041	0.847399	0.396772
LOC100506317	0.319301	3.28826	3.88041	0.847399	0.396772
TTLL10-AS1	0.319301	3.28826	3.88041	0.847399	0.396772
LOC100506446	0.319301	3.28826	3.88041	0.847399	0.396772
LIFR-AS1	0.319301	3.28826	3.88041	0.847399	0.396772
LINC02274	0.319301	3.28826	3.88041	0.847399	0.396772
INMT-MINDY4	0.319301	3.28826	3.88041	0.847399	0.396772
LINC01804	0.319301	3.28826	3.88041	0.847399	0.396772
LOC101927136	0.319301	3.28826	3.88041	0.847399	0.396772
LINC02587	0.319301	3.28826	3.88041	0.847399	0.396772
LOC101927646	0.319301	3.28826	3.88041	0.847399	0.396772
LINC00368	0.319301	3.28826	3.88041	0.847399	0.396772
LINC01809	0.319301	3.28826	3.88041	0.847399	0.396772
LINC01945	0.319301	3.28826	3.88041	0.847399	0.396772
LINC02125	0.319301	3.28826	3.88041	0.847399	0.396772
LOC101928251	0.319301	3.28826	3.88041	0.847399	0.396772
LOC101928561	0.319301	3.28826	3.88041	0.847399	0.396772
TRPM2-AS	0.319301	3.28826	3.88041	0.847399	0.396772
LOC102723364	0.319301	3.28826	3.88041	0.847399	0.396772
LOC102723403	0.319301	3.28826	3.88041	0.847399	0.396772
LINC01445	0.319301	3.28826	3.88041	0.847399	0.396772
LINC02327	0.319301	3.28826	3.88041	0.847399	0.396772
LOC105369310	0.319301	3.28826	3.88041	0.847399	0.396772
LOC105369788	0.319301	3.28826	3.88041	0.847399	0.396772
LOC105369843	0.319301	3.28826	3.88041	0.847399	0.396772
LOC105369863	0.319301	3.28826	3.88041	0.847399	0.396772
LOC105369963	0.319301	3.28826	3.88041	0.847399	0.396772
LOC105370022	0.319301	3.28826	3.88041	0.847399	0.396772
LOC105370292	0.319301	3.28826	3.88041	0.847399	0.396772
LOC105370408	0.319301	3.28826	3.88041	0.847399	0.396772
LOC105370661	0.319301	3.28826	3.88041	0.847399	0.396772
LOC105371078	0.319301	3.28826	3.88041	0.847399	0.396772
LINC02191	0.319301	3.28826	3.88041	0.847399	0.396772
LOC105371695	0.319301	3.28826	3.88041	0.847399	0.396772
LOC105371788	0.319301	3.28826	3.88041	0.847399	0.396772
LOC105371954	0.319301	3.28826	3.88041	0.847399	0.396772
LOC105372044	0.319301	3.28826	3.88041	0.847399	0.396772
LOC105372460	0.319301	3.28826	3.88041	0.847399	0.396772
LOC105372471	0.319301	3.28826	3.88041	0.847399	0.396772
LOC105373057	0.319301	3.28826	3.88041	0.847399	0.396772
LOC105373241	0.319301	3.28826	3.88041	0.847399	0.396772
LOC105373936	0.319301	3.28826	3.88041	0.847399	0.396772
LOC105374339	0.319301	3.28826	3.88041	0.847399	0.396772
LOC105374349	0.319301	3.28826	3.88041	0.847399	0.396772
LOC105374423	0.319301	3.28826	3.88041	0.847399	0.396772
LOC105374438	0.319301	3.28826	3.88041	0.847399	0.396772
LOC105374685	0.319301	3.28826	3.88041	0.847399	0.396772
LOC105374794	0.319301	3.28826	3.88041	0.847399	0.396772
LOC105374811	0.319301	3.28826	3.88041	0.847399	0.396772
LOC105375224	0.319301	3.28826	3.88041	0.847399	0.396772
LOC105375922	0.319301	3.28826	3.88041	0.847399	0.396772
LOC105376533	0.319301	3.28826	3.88041	0.847399	0.396772
LOC105376740	0.319301	3.28826	3.88041	0.847399	0.396772
LOC105377104	0.319301	3.28826	3.88041	0.847399	0.396772
LOC105377685	0.319301	3.28826	3.88041	0.847399	0.396772
LOC105377855	0.319301	3.28826	3.88041	0.847399	0.396772
LOC105377894	0.319301	3.28826	3.88041	0.847399	0.396772
LOC105378426	0.319301	3.28826	3.88041	0.847399	0.396772
LOC105378485	0.319301	3.28826	3.88041	0.847399	0.396772
LOC105378486	0.319301	3.28826	3.88041	0.847399	0.396772
LOC105378885	0.319301	3.28826	3.88041	0.847399	0.396772
LOC105379047	0.319301	3.28826	3.88041	0.847399	0.396772
[truncated: 44,426 more rows]

## Sheet: Supplementary Data 4.
Gene_name	baseMean	log2FoldChange	lfcSE	stat	pvalue
SNX15	10.0521	22.4656	3.09955	7.24803
CDK3	17.7772	8.26646	3.09828	2.66809
S1PR3	5.07837	6.23391	1.67935	3.71209	0.000205557
CSNK1E	4.79737	6.15718	3.10277	1.98441
PPARG	4.00912	5.89049	1.44589	4.07395	4.62234e-05
LOC105369293	3.79247	5.81459	2.13925	2.71805	0.00656682
FABP2	3.72176	5.78925	1.7861	3.24129	0.00118992
PLPPR3	3.70775	5.7858	2.61171	2.21533
SLC27A6	3.42635	5.66677	2.66568	2.12582
LOC105379070	4.56007	5.63604	1.93104	2.91866	0.0035154
AFAP1	18.2727	5.59059	3.05006	1.83295
ZNF385D-AS1	9.16387	5.43742	3.0899	1.75974	0.0784522
LOC105375481	2.72688	5.33888	1.93537	2.75858	0.0058054
AGBL1	2.73072	5.33758	1.95602	2.72879	0.00635672
TMEM63C	4.92297	5.31785	1.59585	3.3323	0.000861318
CTXN2	2.63937	5.29714	2.38656	2.21957
EGF	2.63027	5.28331	1.94718	2.71332	0.00666135
TMEM176A	2.55955	5.25288	2.40124	2.18757
AKR1C2	2.56785	5.24905	2.3755	2.20966	0.0271286
MRGPRE	2.56021	5.24484	2.36592	2.21683	0.0266349
LRRC56	2.47183	5.20111	2.85111	1.82424
LOC101928163	2.46269	5.18958	2.86539	1.81112
LOC105375079	2.42005	5.16313	1.96712	2.62471	0.00867218
LOC102724715	2.41604	5.16051	2.4451	2.11055	0.0348107
PRR16	4.29777	5.11349	1.70702	2.99557	0.00273931
NMRAL2P	2.30002	5.0997	1.9158	2.66192	0.00776963
TRPM1	3.08412	5.06664	1.41024	3.59276	0.000327193
NDNF	5.52184	5.03202	1.60452	3.13616	0.00171175
TOX3	2.16889	5.00865	2.03482	2.46147	0.0138368
ITPRID1	2.10588	4.96079	2.09259	2.37065	0.017757
FCRL2	2.07774	4.94937	1.99344	2.48283	0.0130343
C6orf118	2.08506	4.94902	2.46598	2.00692	0.044758
A1BG-AS1	2.07408	4.9487	2.46391	2.00848	0.0445928
C1orf115	2.01239	4.90248	1.61834	3.02932	0.00245102
LOC105370583	2.00552	4.89506	2.01664	2.42734	0.01521
LOC100506578	1.98983	4.88414	2.03461	2.40053	0.0163712
LOC107985981	1.97743	4.87903	1.63289	2.98798	0.00280827
LOC100129526	1.97414	4.87387	2.48057	1.96482	0.0494349
ADAMTS17	1.9668	4.86525	2.0486	2.37492	0.0175529
MYRFL	1.95113	4.86005	2.05553	2.36438	0.0180602
LOC105373828	1.95666	4.85819	2.08746	2.32732	0.0199483
LOC107985637	1.91581	4.8344	3.03313	1.59386
SNURF	1.89507	4.81798	3.04308	1.58326
LOC112267989	1.88076	4.80041	2.08692	2.30024	0.0214346
LOC112268231	1.86707	4.79377	2.51825	1.90361	0.0569604
DMPK	9.00182	4.78628	1.2151	3.939	8.1823e-05
IGLC1	1.82025	4.75275	3.08662	1.53979	0.123611
BHLHE41	1.82025	4.75275	3.08662	1.53979	0.123611
LOC112268151	1.81641	4.75111	2.53905	1.87121	0.0613155
TMC1	1.78533	4.73109	2.56585	1.84387	0.0652015
LOC105377785	1.78353	4.7271	2.07994	2.27271	0.0230439
CCKBR	3.33982	4.72162	1.74684	2.70295	0.00687275
ITGB3	1.77747	4.71675	1.77307	2.66021	0.0078091
CSRP3-AS1	1.77168	4.71172	2.16864	2.17266	0.0298055
LOC107986990	1.76192	4.70834	2.55463	1.84306	0.0653197
LOC107986181	1.76383	4.70775	2.56739	1.83367	0.0667029
NTS	1.73659	4.68584	2.57191	1.82193	0.068465
LOC101928272	1.73659	4.68584	2.57191	1.82193	0.068465
H3P13	1.71318	4.66506	3.11393	1.49813	0.1341
LOC105377382	1.70934	4.66362	2.57875	1.80848	0.0705321
CNIH3-AS1	1.71126	4.66306	2.60422	1.79058	0.0733605
LOC101928589	6.79305	4.65272	3.07489	1.51313
LOC105370011	1.68401	4.64043	2.60473	1.78154	0.0748238
HACD1	4.23588	4.63754	1.38088	3.35839	0.000783976
LOC105373451	1.65998	4.62128	2.1729	2.12678	0.0334382
SCN2A	3.10041	4.61845	1.72351	2.67968	0.00736921
PADI6	3.10619	4.61814	1.34665	3.42935	0.000605032
ZNF300P1	1.63761	4.60855	2.61907	1.75961	0.0784738
AMYP1	1.63573	4.60699	2.59238	1.77713	0.0755471
LOC105370170	1.6452	4.60548	2.17919	2.1134	0.034567
LOC105379513	3.07912	4.5957	2.47319	1.85821
IMPA1P1	1.62388	4.59099	2.13864	2.14668	0.0318186
LOC102723663	1.61833	4.58624	2.14237	2.14073	0.0322955
PRELP	1.61019	4.58295	2.19232	2.09046	0.0365769
LOC105374506	1.6065	4.57691	2.62844	1.7413	0.0816303
G6PC	1.60418	4.56982	2.64644	1.72678	0.0842073
ENPP1	1.57502	4.54647	2.6339	1.72614	0.0843227
LOC105371530	1.5582	4.53854	2.1444	2.11647	0.0343052
OTOGL	2.93712	4.52613	2.0705	2.18601	0.028815
LOC100505796	1.55753	4.52606	2.23286	2.02702	0.04266
PDE10A	1.54777	4.52203	2.64637	1.70877	0.0874933
CES1	6.56669	4.51762	1.60346	2.81743	0.00484097
LOC105377468	1.54042	4.5129	2.6549	1.69984	0.0891608
EXOGP1	1.53037	4.50942	2.2198	2.03145	0.0422089
GARNL3	1.52244	4.4963	2.66248	1.68876	0.0912645
ADGRA2	1.5034	4.48449	2.69245	1.66558	0.0957975
STK32A	1.50504	4.48252	2.20793	2.03019	0.042337
LOC107985872	1.50348	4.4814	2.21765	2.02079	0.0433015
LOC107984376	1.50304	4.47668	2.23456	2.00338	0.045136
LOC107985138	1.49903	4.47162	3.1164	1.43487	0.151325
NALCN-AS1	1.49519	4.47099	2.67285	1.67274	0.094378
LOC112268075	2.07911	4.46232	2.26416	1.97085	0.0487409
LOC107986018	1.46986	4.44433	2.69796	1.64729	0.0994984
MINAR1	1.4447	4.42855	2.73968	1.61645	0.105997
KIF5A	1.45438	4.42719	2.25945	1.95941	0.0500648
LOC102723690	1.44483	4.42245	2.23429	1.97935	0.0477767
LOC105378516	1.44069	4.41905	2.70065	1.63629	0.101778
ZBTB7C	1.44261	4.41806	2.70554	1.63297	0.102475
LOC101927536	1.44261	4.41806	2.70554	1.63297	0.102475
DMP1	1.44453	4.41734	2.75421	1.60385	0.108746
LOC440040	1.44453	4.41734	2.75421	1.60385	0.108746
LOC105370807	25.2944	4.39639	1.8357	2.39495
LRFN2	1.41153	4.39335	2.7581	1.59289	0.111185
TM4SF1	1.41365	4.39244	2.23186	1.96807	0.0490604
CASC15	1.41537	4.39134	2.71573	1.617	0.105878
LOC107986666	1.41537	4.39134	2.71573	1.617	0.105878
ZSCAN4	1.41729	4.39045	2.74631	1.59867	0.109894
RPL5P32	1.41729	4.39045	2.74631	1.59867	0.109894
LINC01180	1.39404	4.37308	2.28313	1.91539	0.0554426
FGB	1.3862	4.36522	2.73988	1.59322	0.111111
PDE11A	1.3862	4.36522	2.73988	1.59322	0.111111
RPL15P2	1.39196	4.36422	3.11793	1.39972	0.161598
MPP3	1.38812	4.36413	2.72858	1.59941	0.109728
PLEKHH2	1.38812	4.36413	2.72858	1.59941	0.109728
LOC401478	1.38812	4.36413	2.72858	1.59941	0.109728
C3orf85	1.39004	4.36312	2.74736	1.58812	0.11226
NWD1	1.3824	4.35552	2.744	1.58729	0.112448
LINC01981	2.60582	4.34693	2.12008	2.05036	0.040329
SLC15A1	1.35895	4.33754	2.76599	1.56817	0.116842
LINC01868	1.35895	4.33754	2.76599	1.56817	0.116842
NINL	1.36087	4.33642	2.74411	1.58027	0.114046
SLCO1B1	1.36279	4.33532	2.75355	1.57445	0.115383
GLRA3	1.3453	4.31439	2.80562	1.53777	0.124105
LONRF2	1.33362	4.30819	2.76259	1.55947	0.118884
LAMB4	1.84885	4.30535	1.88786	2.28054	0.0225757
LOC107985903	1.32991	4.30403	2.27175	1.89459	0.0581466
KRT18P18	1.86383	4.29966	1.90892	2.2524	0.024297
LOC107986920	1.30966	4.28821	2.26294	1.89497	0.0580959
LINC01122	1.30829	4.27817	2.77617	1.54103	0.123308
LRRC7-AS1	1.30829	4.27817	2.77617	1.54103	0.123308
CDHR3	1.31021	4.27708	2.80428	1.52519	0.12721
GABRA5	1.29865	4.26472	2.79933	1.52348	0.127638
CNTNAP4	1.29865	4.26472	2.79933	1.52348	0.127638
LOC105376011	2.44895	4.25829	1.56295	2.72453	0.0064393
MPDZ	3.31569	4.25614	2.07732	2.04886	0.0404758
LOC107986977	1.27933	4.25104	2.32023	1.83216	0.0669274
F11	1.27912	4.25003	2.81194	1.51142	0.130681
GRM6	1.27912	4.25003	2.81194	1.51142	0.130681
EPGN	1.28104	4.24876	2.79211	1.5217	0.128084
LOC101926960	1.28104	4.24876	2.79211	1.5217	0.128084
IGLV1-47	1.28488	4.24817	3.11971	1.36172	0.173286
ZNF519	1.28488	4.24817	3.11971	1.36172	0.173286
EVADR	1.28296	4.24754	2.80778	1.51278	0.130337
C10orf90	1.27533	4.23932	2.80551	1.51107	0.13077
FLT3	7.86226	4.22739	1.37917	3.06517	0.00217545
LOC105376159	1.254	4.21856	2.32775	1.81229	0.0699414
BPESC1	1.25572	4.21744	2.81644	1.49744	0.13428
LINC00924	1.25572	4.21744	2.81644	1.49744	0.13428
LOC102724903	1.25572	4.21744	2.81644	1.49744	0.13428
OR3A2	1.74762	4.21236	1.65128	2.55097	0.0107422
NID1	1.24345	4.20604	1.9383	2.16996	0.0300098
ZNF462	1.24224	4.20547	2.32199	1.81115	0.070118
PDE6C	1.23703	4.20005	2.3348	1.79889	0.0720355
LOC105376626	3.19488	4.19233	1.67611	2.50122	0.0123765
LOC100130207	3.10693	4.18933	1.7674	2.37033	0.0177724
LOC105374492	1.22655	4.18813	2.83427	1.47768	0.139495
EFCAB10	2.36584	4.1875	1.46975	2.84913	0.00438392
SLC44A5	1.22847	4.18674	2.82917	1.47985	0.138913
LOC101927914	1.21942	4.18566	2.33348	1.79374	0.0728545
ONECUT2	2.37019	4.17624	1.7885	2.33505	0.0195409
ANKRD62P1-PARP4P3	2.33283	4.1761	1.56987	2.66016	0.00781033
LOC107986764	1.20915	4.17194	2.85223	1.46269	0.143552
TMPOP1	1.20535	4.16051	2.84597	1.46189	0.14377
E2F2	10.5334	4.15964	2.76069	1.50674	0.131878
LOC107986635	1.67743	4.15874	2.29915	1.80881	0.0704799
LOC105375886	1.20122	4.15541	2.84547	1.46036	0.144192
LOC107987083	1.20122	4.15541	2.84547	1.46036	0.144192
LOC105375700	1.20129	4.15431	2.35718	1.76241	0.078
RBP1	1.20314	4.15407	2.87036	1.44723	0.147833
LINC01148	1.20314	4.15407	2.87036	1.44723	0.147833
SLC36A3	3.09878	4.15022	2.13549	1.94345	0.0519618
LOC107984756	39.8096	4.14984	1.77239	2.34139
MESTIT1	1.19452	4.14782	2.85257	1.45407	0.145928
LOC105373485	1.19158	4.14064	2.86695	1.44427	0.148663
ACTA2-AS1	1.64705	4.13789	1.91969	2.15549	0.0311233
NRP2	1.18617	4.13422	2.87029	1.44035	0.149769
HECW1	1.18373	4.12866	2.42837	1.70018	0.0890977
SMIM33	1.17247	4.12556	3.12175	1.32156	0.186316
VTCN1	1.17397	4.1234	2.86512	1.43917	0.150102
SH3BGRL2	1.17397	4.1234	2.86512	1.43917	0.150102
MCHR2	1.17397	4.1234	2.86512	1.43917	0.150102
LOC100533853	1.17397	4.1234	2.86512	1.43917	0.150102
TSLP	1.17781	4.12198	3.12181	1.32038	0.186708
MFF-DT	1.17781	4.12198	3.12181	1.32038	0.186708
LOC105372316	1.17781	4.12198	3.12181	1.32038	0.186708
LOC105374920	1.17781	4.12198	3.12181	1.32038	0.186708
MOCOS	1.17589	4.12192	2.8767	1.43286	0.151897
ZSWIM5P2	1.17589	4.12192	2.8767	1.43286	0.151897
LINC02164	1.17589	4.12192	2.8767	1.43286	0.151897
LOC105377981	1.17589	4.12192	2.8767	1.43286	0.151897
MAP2	3.05519	4.11916	1.79376	2.29638	0.0216541
LOC100533706	1.17026	4.11839	2.37431	1.73456	0.0828188
FAM184A	1.16241	4.10905	2.36963	1.73405	0.0829091
LOC101927793	1.15286	4.10236	2.87265	1.42807	0.153271
AMPH	7.47026	4.09163	1.49548	2.73601	0.00621892
LINC00488	1.14672	4.09069	2.88916	1.41588	0.156812
LOC105373559	1.14672	4.09069	2.88916	1.41588	0.156812
PABPC1P8	1.15121	4.09021	2.45712	1.66463	0.0959861
EYA4	1.14864	4.08911	2.88851	1.41565	0.156879
LOC105369576	1.14864	4.08911	2.88851	1.41565	0.156879
LOC105370852	1.14864	4.08911	2.88851	1.41565	0.156879
LINC01808	1.14864	4.08911	2.88851	1.41565	0.156879
TXNDC8	1.14516	4.08908	2.90169	1.40921	0.158774
GRM7	2.90617	4.08385	2.17844	1.87467	0.0608379
FOXF1	1.12783	4.07167	2.89647	1.40574	0.159802
MYRIP	2.92511	4.06855	1.87434	2.17067	0.0299565
ANKRD18CP	1.58919	4.06636	1.97718	2.05664	0.0397207
FOLR1P1	3.81695	4.06488	1.33264	3.05025	0.00228655
LINC01992	1.1216	4.05613	2.90667	1.39545	0.162879
KANK4	1.12139	4.05557	2.90508	1.39603	0.162706
LOC105373261	1.12139	4.05557	2.90508	1.39603	0.162706
LOC105374594	1.12139	4.05557	2.90508	1.39603	0.162706
LOC107984694	1.12139	4.05557	2.90508	1.39603	0.162706
GRIA3	1.11213	4.04421	2.91318	1.38824	0.165063
PRAME	1.11213	4.04421	2.91318	1.38824	0.165063
LINC01289	1.10983	4.03975	2.41559	1.67236	0.094453
MMP16	4.23188	4.03732	1.78706	2.2592	0.0238712
ZNF704	3.66367	4.03632	1.63167	2.47374	0.0133708
PCSK1	1.10783	4.03471	2.93788	1.37334	0.169648
PTPRB	2.16952	4.03263	1.8814	2.14342	0.0320791
EEF1A1P17	1.09615	4.02861	2.51026	1.60486	0.108525
FAM24B-CUZD1	1.09415	4.02127	2.92579	1.37442	0.169311
LOC105378360	1.09415	4.02127	2.92579	1.37442	0.169311
OSBPL10	1.09606	4.01962	2.94613	1.36437	0.17245
LINC00958	1.09606	4.01962	2.94613	1.36437	0.17245
LINC01087	1.09606	4.01962	2.94613	1.36437	0.17245
KIAA1549	2.89422	4.0144	1.79293	2.23902	0.0251549
VWFP1	1.08745	4.01297	2.93603	1.3668	0.171688
CTB-3M24.3	2.10778	4.01016	2.22026	1.80617	0.0708922
LOC105369618	2.13443	4.00902	2.20514	1.81803	0.0690597
SLC28A1	1.07717	3.99877	2.42749	1.64729	0.0994989
LOC107984234	1.07032	3.99682	2.44433	1.63513	0.102021
EEF1DP3	1.07113	3.99597	3.1241	1.27908	0.20087
LOC105375402	1.07474	3.99568	2.45157	1.62985	0.103134
NLRP2B	1.0746	3.99547	2.43393	1.64157	0.100678
ARPP19P1	1.06626	3.99172	2.4182	1.6507	0.0987993
LOC102725191	1.06711	3.98627	2.4657	1.61669	0.105946
TIMP3	1.0669	3.98616	2.95101	1.35078	0.176766
ANKRD33	1.06882	3.98437	2.95643	1.3477	0.177756
TMPRSS11F	1.06882	3.98437	2.95643	1.3477	0.177756
LOC100421580	1.06882	3.98437	2.95643	1.3477	0.177756
LOC100505918	1.06882	3.98437	2.95643	1.3477	0.177756
PRSS3	1.07074	3.98368	3.12434	1.27505	0.202292
LINC00254	1.07074	3.98368	3.12434	1.27505	0.202292
LOC339593	1.07074	3.98368	3.12434	1.27505	0.202292
LOC105377724	1.07074	3.98368	3.12434	1.27505	0.202292
LOC101929534	2.08066	3.98324	1.86841	2.13188	0.0330167
LOC101927434	1.05734	3.97824	2.94586	1.35045	0.176872
LOC105369667	2.77564	3.97683	2.15353	1.84666	0.0647965
COBLL1	2.07993	3.96904	2.2202	1.7877	0.0738252
LOC107986830	1.05398	3.9688	2.08774	1.901	0.0573014
SLC12A1	164.353	3.96182	1.06469	3.72111
LOC112268466	1.04736	3.96042	2.45698	1.61191	0.106982
ST13P1	1.04549	3.95163	2.52102	1.56747	0.117004
VWA5B1	1.03773	3.95161	3.12496	1.26453	0.206039
LOC101928733	1.03965	3.95019	2.982	1.32468	0.185278
NPY5R	1.04157	3.94829	2.97282	1.32813	0.184135
LINC02290	1.04157	3.94829	2.97282	1.32813	0.184135
LOC105377115	1.04157	3.94829	2.97282	1.32813	0.184135
LOC105378557	1.04157	3.94829	2.97282	1.32813	0.184135
LOC101928357	1.03001	3.93112	2.488	1.58003	0.1141
LOC105373696	1.02609	3.92578	2.48078	1.58248	0.11354
ZNF618	1.99823	3.92545	2.24351	1.74969	0.0801718
LOC107984112	1.02216	3.9205	2.49253	1.5729	0.115742
LOC105377604	1.01946	3.91682	2.49411	1.57043	0.116315
LOC100129340	1.01432	3.91133	2.99427	1.30627	0.191461
NPY4R	1.01624	3.90952	3.02991	1.29031	0.196944
LOC105374362	1.00668	3.89981	2.50171	1.55886	0.11903
LOC105375906	1.00276	3.89436	2.48963	1.56423	0.117763
FSTL1	0.996919	3.89316	2.55135	1.52592	0.127029
AGR3	0.998839	3.88893	2.49199	1.56057	0.118625
CENPI	1.00076	3.8881	3.02549	1.28511	0.198753
LINC02673	1.00076	3.8881	3.02549	1.28511	0.198753
ENO4	1.93614	3.88439	2.25929	1.71929	0.0855608
CYP39A1	1.98183	3.88307	1.9447	1.99674	0.0458529
LOC107986576	0.987655	3.88098	2.51184	1.54507	0.122329
LOC105375228	1.96765	3.87974	1.56711	2.47574	0.0132962
C2orf27A	0.990994	3.87815	2.55314	1.51897	0.12877
ATRNL1	3.82316	3.87722	1.80252	2.151	0.0314761
LOC105372049	0.985361	3.87618	3.01021	1.28768	0.197858
LOC105374997	2.59283	3.87576	1.89593	2.04424	0.0409294
EN2	0.987072	3.87344	3.02083	1.28224	0.199758
A2ML1	0.987072	3.87344	3.02083	1.28224	0.199758
WDR72	0.987072	3.87344	3.02083	1.28224	0.199758
HSPD1P8	0.987072	3.87344	3.02083	1.28224	0.199758
LOC101929974	0.987072	3.87344	3.02083	1.28224	0.199758
CGNL1	1.91075	3.87284	1.70279	2.27441	0.0229411
CTBP2P1	1.40558	3.87237	2.03576	1.90218	0.0571481
GDI2P1	0.988991	3.87141	3.03522	1.2755	0.202133
LOC105379050	0.988991	3.87141	3.03522	1.2755	0.202133
RPL19P21	0.984436	3.86936	2.50584	1.54414	0.122555
ZNF816-ZNF321P	7.17711	3.86724	1.47421	2.62326
LOC102724438	0.978457	3.86636	3.02144	1.27964	0.20067
LINC00824	0.973594	3.8594	3.0256	1.27558	0.202104
LOC101928274	0.975513	3.85676	2.50643	1.53875	0.123867
C2orf69P2	0.977432	3.85515	3.0369	1.26944	0.204285
ACTBL2	0.97159	3.8512	2.5139	1.53196	0.125532
ABO	0.965749	3.84803	3.06134	1.25697	0.208764
AFAP1-AS1	0.965611	3.84789	3.04279	1.26459	0.206018
PGM5P4	0.967668	3.84563	2.53371	1.51778	0.129069
LOC105376759	1.37689	3.84239	2.04201	1.88167	0.0598806
SPATA31D5P	0.957904	3.83646	3.1273	1.22677	0.219911
LOC107986217	0.957904	3.83646	3.1273	1.22677	0.219911
COLCA2	0.959823	3.83454	3.0536	1.25574	0.209209
LOC107984390	0.959823	3.83454	3.0536	1.25574	0.209209
CLCA4	0.961743	3.83236	3.05043	1.25634	0.208995
SSUH2	0.961743	3.83236	3.05043	1.25634	0.208995
LOC105372969	0.961743	3.83236	3.05043	1.25634	0.208995
LOC105375749	0.961743	3.83236	3.05043	1.25634	0.208995
LOC105376957	0.961743	3.83236	3.05043	1.25634	0.208995
LOC105377991	0.961743	3.83236	3.05043	1.25634	0.208995
LOC107986841	1.9125	3.83107	1.59153	2.40716	0.0160772
HOXB5	0.963662	3.8307	3.12742	1.22488	0.220622
ZNF471	0.963662	3.8307	3.12742	1.22488	0.220622
BRINP2	0.963662	3.8307	3.12742	1.22488	0.220622
LINC01226	0.963662	3.8307	3.12742	1.22488	0.220622
LOC101928084	0.963662	3.8307	3.12742	1.22488	0.220622
LOC102724234	0.963662	3.8307	3.12742	1.22488	0.220622
LOC105372106	0.963662	3.8307	3.12742	1.22488	0.220622
LOC105372204	0.963662	3.8307	3.12742	1.22488	0.220622
LOC105372319	0.963662	3.8307	3.12742	1.22488	0.220622
LOC105374639	0.963662	3.8307	3.12742	1.22488	0.220622
LOC105375875	0.963662	3.8307	3.12742	1.22488	0.220622
ARNTL2	2.57776	3.82336	1.84889	2.06792	0.0386472
RFC3P1	0.954106	3.8215	3.05474	1.251	0.210933
IQGAP3	0.94042	3.80672	2.57036	1.48101	0.138605
LOC102724351	1.87555	3.79794	1.93577	1.96198	0.0497644
LOC107984755	469.563	3.79603	1.09081	3.48002
LOC105372174	1.8677	3.7929	2.27025	1.6707	0.0947809
WNT9B	0.934495	3.79229	3.07241	1.23431	0.217089
HERC2P4	0.934495	3.79229	3.07241	1.23431	0.217089
LOC101269108	0.934495	3.79229	3.07241	1.23431	0.217089
SDAD1-AS1	0.934495	3.79229	3.07241	1.23431	0.217089
LOC107984792	0.934495	3.79229	3.07241	1.23431	0.217089
LOC107986317	0.934495	3.79229	3.07241	1.23431	0.217089
PLIN2	1622.96	3.78745	1.39053	2.72374
LOC105377357	0.93078	3.78707	3.0758	1.23125	0.21823
ACTG1P9	1.32438	3.77926	2.0725	1.82352	0.0682244
ALKAL2	0.921224	3.77815	3.12856	1.20763	0.227188
DPPA3	0.921224	3.77815	3.12856	1.20763	0.227188
LOC112267900	2.48033	3.76277	2.19947	1.71076	0.0871245
LOC101928446	0.91701	3.76097	3.12189	1.20471	0.228316
CAV1	0.907246	3.75113	3.09909	1.2104	0.226127
DYDC1	0.907246	3.75113	3.09909	1.2104	0.226127
APCDD1L-DT	0.907246	3.75113	3.09909	1.2104	0.226127
LINC01102	0.907246	3.75113	3.09909	1.2104	0.226127
CSTF3-DT	0.907246	3.75113	3.09909	1.2104	0.226127
PRKG2-AS1	0.907246	3.75113	3.09909	1.2104	0.226127
LOC107984733	0.907246	3.75113	3.09909	1.2104	0.226127
LOC100113374	0.909166	3.74885	3.12921	1.19802	0.23091
LOC105369842	0.909166	3.74885	3.12921	1.19802	0.23091
LOC107985591	0.909166	3.74885	3.12921	1.19802	0.23091
ATP10B	0.901613	3.74822	3.09263	1.21199	0.225518
LOC105371840	1.78792	3.74538	2.75498	1.3595	0.173989
LOC105371986	0.902041	3.74255	2.57537	1.45321	0.146165
LIFR	0.897691	3.74214	3.09663	1.20846	0.226871
LOC100132242	0.897691	3.74214	3.09663	1.20846	0.226871
LANCL3	1.81141	3.73966	1.93261	1.93503	0.0529872
HTR2A	0.893768	3.73602	3.10706	1.20243	0.229197
SLC7A14	0.893768	3.73602	3.10706	1.20243	0.229197
LOC105376661	0.893768	3.73602	3.10706	1.20243	0.229197
MYT1	0.889846	3.72987	3.11827	1.19613	0.231645
LOC105373794	1.27789	3.7281	2.08823	1.78529	0.0742143
LINC02402	0.893684	3.72494	3.12923	1.19037	0.233901
LOC105373734	0.893684	3.72494	3.12923	1.19037	0.233901
LOC105379025	1.26282	3.72275	2.06708	1.80097	0.0717075
LOC105374191	1.75683	3.72107	2.30379	1.6152	0.106268
MPPED2	1.76315	3.72106	2.30156	1.61676	0.105931
LOC107986178	1.78788	3.72103	2.29295	1.62281	0.10463
MIR3168	0.887705	3.72043	2.58584	1.43877	0.150215
CLNS1AP1	0.892331	3.71999	2.66386	1.39646	0.162575
LOC107985270	0.889625	3.71852	3.1299	1.18806	0.234808
NEDD4L	2.38734	3.71563	1.87836	1.97812	0.047915
HTR1D	0.878079	3.71132	3.13006	1.1857	0.23574
CTTNBP2	0.878079	3.71132	3.13006	1.1857	0.23574
LINC00691	0.878079	3.71132	3.13006	1.1857	0.23574
CFAP221	0.878079	3.71132	3.13006	1.1857	0.23574
BIVM-ERCC5	0.878079	3.71132	3.13006	1.1857	0.23574
LOC105372719	0.878079	3.71132	3.13006	1.1857	0.23574
GFRA1	1.2804	3.7104	2.45247	1.51292	0.1303
MARK1	0.879998	3.70879	3.13012	1.18487	0.236069
PKP1	0.879998	3.70879	3.13012	1.18487	0.236069
LINC01559	0.879998	3.70879	3.13012	1.18487	0.236069
LOC105377571	0.879998	3.70879	3.13012	1.18487	0.236069
LOC101928362	1.27188	3.70878	2.95664	1.25439	0.209701
FCRL1	54.3359	3.6996	0.601097	6.15474	7.52001e-10
LOC105369965	1.75871	3.69866	2.31619	1.59687	0.110295
LOC105377732	1.76255	3.69508	2.30935	1.60006	0.109586
LOC105376442	3.42403	3.69457	1.82978	2.01913	0.0434733
LOC105374736	2.37197	3.68874	1.55397	2.37376	0.0176081
NXPE1	1.25123	3.68103	2.54311	1.44745	0.14777
WFDC2	0.860595	3.67825	2.63736	1.39467	0.163115
LOC642890	0.860595	3.67825	2.63736	1.39467	0.163115
LOC107986669	0.862514	3.67296	2.64627	1.38798	0.165145
LOC101927329	0.85275	3.66522	3.13114	1.17057	0.241773
BVES	0.854669	3.66241	3.13121	1.16965	0.242144
ZNF114	0.854669	3.66241	3.13121	1.16965	0.242144
TMEM200C	0.854669	3.66241	3.13121	1.16965	0.242144
CALML3-AS1	0.854669	3.66241	3.13121	1.16965	0.242144
LOC105373324	0.854669	3.66241	3.13121	1.16965	0.242144
LOC105374581	0.854669	3.66241	3.13121	1.16965	0.242144
LOC105375284	0.854669	3.66241	3.13121	1.16965	0.242144
LOC105375754	0.854669	3.66241	3.13121	1.16965	0.242144
CACNA1C-IT1	0.854669	3.66241	3.13121	1.16965	0.242144
LOC107987339	0.854669	3.66241	3.13121	1.16965	0.242144
AQP4	0.856588	3.65957	3.13128	1.16872	0.242518
GRK4	0.856588	3.65957	3.13128	1.16872	0.242518
OXT	0.856588	3.65957	3.13128	1.16872	0.242518
DDO	0.856588	3.65957	3.13128	1.16872	0.242518
CBLN2	0.856588	3.65957	3.13128	1.16872	0.242518
LINC01252	0.856588	3.65957	3.13128	1.16872	0.242518
SLC22A10	0.856588	3.65957	3.13128	1.16872	0.242518
SAR1AP1	0.856588	3.65957	3.13128	1.16872	0.242518
ESRG	0.856588	3.65957	3.13128	1.16872	0.242518
LOC105370163	0.856588	3.65957	3.13128	1.16872	0.242518
LOC105374265	0.856588	3.65957	3.13128	1.16872	0.242518
LOC105376010	0.856588	3.65957	3.13128	1.16872	0.242518
LOC105376361	0.856588	3.65957	3.13128	1.16872	0.242518
LOC105379230	0.856588	3.65957	3.13128	1.16872	0.242518
LOC107984120	0.856588	3.65957	3.13128	1.16872	0.242518
LINC02009	2.29762	3.65601	1.87532	1.94954	0.0512311
OR6C3	0.845113	3.65383	2.66681	1.37011	0.170652
LINC01355	1.64174	3.64793	1.95859	1.86253	0.0625285
ANKRD26P3	0.841191	3.64743	2.66998	1.36609	0.171911
SOCS5P1	1.22782	3.64185	2.47963	1.46871	0.141913
LOC112267902	0.837477	3.64088	3.13173	1.16258	0.245
LINC01297-DUXAP10-NBEAP6	2.85844	3.64049	1.68981	2.15437	0.031211
SNAP91	2.29748	3.63072	2.24542	1.61694	0.105891
RPL31P39	0.835266	3.62898	2.65458	1.36706	0.171605
FAM95C	2.85929	3.62015	2.20672	1.64051	0.1009
LOC105373131	0.823944	3.61825	3.13228	1.15515	0.248029
C8G	0.822866	3.61794	2.65136	1.36456	0.172392
MYH1	0.827421	3.61732	3.1323	1.15484	0.248155
XRCC6P1	0.827421	3.61732	3.1323	1.15484	0.248155
RPL10AP11	0.827421	3.61732	3.1323	1.15484	0.248155
LOC100507560	0.827421	3.61732	3.1323	1.15484	0.248155
LOC105374490	0.827421	3.61732	3.1323	1.15484	0.248155
ADAM7	1.64792	3.61696	2.43956	1.48263	0.138172
LOC107986989	2.86534	3.61662	2.19909	1.6446	0.100053
C5orf17	0.82934	3.61421	3.13238	1.15382	0.248574
STAU2P1	0.817865	3.60794	3.13254	1.15176	0.249418
LOC101929230	0.817865	3.60794	3.13254	1.15176	0.249418
LOC105375829	1.66191	3.60657	1.96822	1.8324	0.066892
TMEM108	1.17315	3.60484	2.53354	1.42285	0.15478
CHORDC2P	0.813943	3.60127	3.1327	1.14957	0.25032
PLEKHG7	0.813668	3.60081	3.13271	1.14942	0.250381
LOC101929340	1.66724	3.60043	1.99537	1.8044	0.0711693
LINC01482	0.815862	3.59711	2.67072	1.34687	0.178023
LOC105374020	0.810021	3.59456	3.13287	1.14737	0.251228
LOC102723985	1.62883	3.59403	2.34461	1.53289	0.125303
ANO5	1.65355	3.59401	2.33497	1.53921	0.123754
MYT1L	1.65547	3.59193	2.34035	1.53478	0.124837
GNG10P1	0.806098	3.58783	3.13304	1.14516	0.252142
VTN	0.805961	3.5876	3.13304	1.14509	0.252173
C1orf158	0.805961	3.5876	3.13304	1.14509	0.252173
RNF180	0.805961	3.5876	3.13304	1.14509	0.252173
IL1RAPL1	0.808017	3.58377	2.67746	1.3385	0.180735
PRAMEF14	0.808017	3.58377	2.67746	1.3385	0.180735
LOC105370475	0.808017	3.58377	2.67746	1.3385	0.180735
LINC01923	0.80788	3.58352	2.66852	1.34289	0.179309
MAS1	3.67799	3.58231	1.86927	1.91643	0.0553108
CHGB	0.809937	3.58121	3.1332	1.14299	0.253044
CYCSP19	0.809937	3.58121	3.1332	1.14299	0.253044
PABPC5	2.17242	3.5804	2.25544	1.58745	0.112411
NEUROD1	3.23304	3.57669	2.1751	1.64438	0.100098
LINC00989	0.80723	3.57649	3.13332	1.14144	0.253688
LOC105369710	0.80723	3.57649	3.13332	1.14144	0.253688
TFAP2A-AS2	0.802742	3.5748	2.71997	1.31428	0.188751
CALCRL	0.798254	3.57428	3.13338	1.14071	0.25399
FBXL7	0.798254	3.57428	3.13338	1.14071	0.25399
PLXNA4	0.798254	3.57428	3.13338	1.14071	0.25399
PRDM6	0.798254	3.57428	3.13338	1.14071	0.25399
OR5M10	0.798254	3.57428	3.13338	1.14071	0.25399
HERC2P11	0.798254	3.57428	3.13338	1.14071	0.25399
LOC105369322	0.798254	3.57428	3.13338	1.14071	0.25399
LOC105369487	0.798254	3.57428	3.13338	1.14071	0.25399
LOC105374200	0.798254	3.57428	3.13338	1.14071	0.25399
LOC105377043	0.798254	3.57428	3.13338	1.14071	0.25399
ABCC13	2.21381	3.57241	1.88173	1.89847	0.0576338
MYH2	0.800173	3.57089	3.13346	1.1396	0.254453
LOC101928819	0.800173	3.57089	3.13346	1.1396	0.254453
LOC101929577	0.800173	3.57089	3.13346	1.1396	0.254453
LOC102723831	0.800173	3.57089	3.13346	1.1396	0.254453
LOC105372672	0.800173	3.57089	3.13346	1.1396	0.254453
LOC105375409	0.800173	3.57089	3.13346	1.1396	0.254453
NOTCH3	2.19147	3.56947	1.68458	2.11891	0.0340983
TRPC6	0.802092	3.56747	3.13355	1.13848	0.254922
KRT8P30	0.802092	3.56747	3.13355	1.13848	0.254922
CD40	7.75858	3.56657	2.79557	1.27579	0.202028
LOC105374821	1.62822	3.56548	2.34489	1.52053	0.128378
LINGO2	2.9356	3.55265	1.64644	2.15778	0.0309449
LOC107984684	2.18828	3.55113	2.25584	1.5742	0.115442
SLC13A1	1.61274	3.54826	1.98379	1.78862	0.0736758
LINC02225	1.58602	3.54126	2.06472	1.71513	0.0863222
LOC112268066	1.59906	3.54085	2.36328	1.49828	0.134062
HTR4	0.786611	3.5405	3.13424	1.12962	0.258637
SMIM21	0.786611	3.5405	3.13424	1.12962	0.258637
LOC105370747	0.786611	3.5405	3.13424	1.12962	0.258637
PCDH20	0.780769	3.53717	2.71551	1.30258	0.192718
ZNF806	1.6029	3.53645	2.372	1.49091	0.135984
PRDX6-AS1	12.7355	3.53624	1.19317	2.96374
SPOCK1	1.5555	3.5347	1.99094	1.7754	0.0758325
SYNPR	2.83301	3.53072	1.97472	1.78796	0.0737823
LRRC9	2.16295	3.52954	2.26969	1.55507	0.119928
CPNE5	11.5963	3.52398	2.28154	1.54456	0.122452
FBXL21P	0.772925	3.52306	3.1347	1.12389	0.261059
TDRP	0.772925	3.52306	3.1347	1.12389	0.261059
LOC105376017	0.772925	3.52306	3.1347	1.12389	0.261059
DCT	0.774844	3.51929	3.1348	1.12265	0.261584
GPC3	0.774844	3.51929	3.1348	1.12265	0.261584
PGF	0.774844	3.51929	3.1348	1.12265	0.261584
ELOVL4	0.774844	3.51929	3.1348	1.12265	0.261584
IGHV7-56	0.774844	3.51929	3.1348	1.12265	0.261584
DDX59-AS1	0.774844	3.51929	3.1348	1.12265	0.261584
LOC105372125	0.774844	3.51929	3.1348	1.12265	0.261584
LOC105374122	0.774844	3.51929	3.1348	1.12265	0.261584
SOX5	2.10246	3.50924	2.70849	1.29564	0.195099
LOC107984805	3.05808	3.50655	1.83906	1.90671	0.0565582
LOC105375427	2.11388	3.50001	1.63833	2.13633	0.0326527
DDX18P6	0.763285	3.49871	3.13534	1.11589	0.264468
LOC105376237	0.763285	3.49871	3.13534	1.11589	0.264468
DCHS2	1.53745	3.49855	1.9904	1.75771	0.0787975
PTGFR	2.90859	3.49155	1.93007	1.80903	0.0704468
ELF5	0.753729	3.48917	3.1356	1.11276	0.265812
PGAP4	0.753729	3.48917	3.1356	1.11276	0.265812
LOC107985847	0.757872	3.48873	3.13561	1.11262	0.265873
LOC107985962	1.53344	3.48724	2.43181	1.43401	0.15157
LOC105369873	1.50962	3.48335	2.38973	1.45763	0.144942
CFAP97D2	1.50976	3.48335	2.38967	1.45767	0.144931
LAMC2	1.52986	3.48334	2.38093	1.46302	0.143463
UGT2A3	0.75544	3.48257	2.75241	1.26528	0.205772
LOC105376147	1.5484	3.48089	2.3749	1.4657	0.14273
ALG1L2	0.748316	3.47919	3.13587	1.10948	0.267222
LINC02341	0.751518	3.47548	2.78007	1.25014	0.211248
GCOM1	17.1988	3.4747	1.97453	1.75976	0.0784492
GCSAML-AS1	0.745884	3.47467	3.13599	1.108	0.267863
LOC654780	16.8537	3.47443	3.015	1.15238
LOC105377094	0.74561	3.47418	3.136	1.10784	0.267933
KDR	0.747596	3.46959	3.13613	1.10633	0.268584
TBX5	0.747596	3.46959	3.13613	1.10633	0.268584
CCDC198	0.747596	3.46959	3.13613	1.10633	0.268584
CFHR5	0.747596	3.46959	3.13613	1.10633	0.268584
XIRP2	0.747596	3.46959	3.13613	1.10633	0.268584
UBE2U	0.747596	3.46959	3.13613	1.10633	0.268584
NLRP14	0.747596	3.46959	3.13613	1.10633	0.268584
LINC01630	0.747596	3.46959	3.13613	1.10633	0.268584
CNTNAP2-AS1	0.747596	3.46959	3.13613	1.10633	0.268584
LINC02204	0.747596	3.46959	3.13613	1.10633	0.268584
LOC102724227	0.747596	3.46959	3.13613	1.10633	0.268584
LOC105369561	0.747596	3.46959	3.13613	1.10633	0.268584
LINC02472	0.747596	3.46959	3.13613	1.10633	0.268584
LOC105378576	0.747596	3.46959	3.13613	1.10633	0.268584
BSPRY	0.741962	3.46737	3.13619	1.1056	0.2689
LOC105374048	0.741962	3.46737	3.13619	1.1056	0.2689
LOC105377166	0.741962	3.46737	3.13619	1.1056	0.2689
LOC105371532	0.74155	3.46663	3.13621	1.10536	0.269005
CDH8	0.749515	3.46539	3.13624	1.10495	0.269182
GABRA1	0.749515	3.46539	3.13624	1.10495	0.269182
PCDHA11	0.749515	3.46539	3.13624	1.10495	0.269182
GREM2	0.749515	3.46539	3.13624	1.10495	0.269182
BEST3	0.749515	3.46539	3.13624	1.10495	0.269182
LURAP1L	0.749515	3.46539	3.13624	1.10495	0.269182
LOC400867	0.749515	3.46539	3.13624	1.10495	0.269182
RPSAP49	0.749515	3.46539	3.13624	1.10495	0.269182
ZNF727	0.749515	3.46539	3.13624	1.10495	0.269182
TBCAP2	0.749515	3.46539	3.13624	1.10495	0.269182
LINC02871	0.749515	3.46539	3.13624	1.10495	0.269182
LINC00507	0.749515	3.46539	3.13624	1.10495	0.269182
PRKCA-AS1	0.749515	3.46539	3.13624	1.10495	0.269182
LOC101928882	0.749515	3.46539	3.13624	1.10495	0.269182
LOC101929048	0.749515	3.46539	3.13624	1.10495	0.269182
LOC102723395	0.749515	3.46539	3.13624	1.10495	0.269182
LOC105369400	0.749515	3.46539	3.13624	1.10495	0.269182
LOC105369905	0.749515	3.46539	3.13624	1.10495	0.269182
LOC105372592	0.749515	3.46539	3.13624	1.10495	0.269182
SYN3-AS1	0.749515	3.46539	3.13624	1.10495	0.269182
LOC105373293	0.749515	3.46539	3.13624	1.10495	0.269182
LOC105374975	0.749515	3.46539	3.13624	1.10495	0.269182
LOC105376161	0.749515	3.46539	3.13624	1.10495	0.269182
LINC02642	0.749515	3.46539	3.13624	1.10495	0.269182
LOC105376496	0.749515	3.46539	3.13624	1.10495	0.269182
LOC112267961	0.749515	3.46539	3.13624	1.10495	0.269182
LOC105373372	3.32291	3.46526	1.59456	2.17318	0.0297667
ENOX1	3.78733	3.46435	2.12518	1.63014	0.103071
LOC400464	0.739256	3.46365	2.74188	1.26324	0.206504
RAB19	47.156	3.46027	0.676595	5.11425	3.14994e-07
LOC105378964	0.73804	3.46003	3.13639	1.10319	0.269944
NPAP1	1.08306	3.45646	2.58151	1.33893	0.180594
LOC107986108	1.51923	3.45493	2.38978	1.44571	0.148258
PURG	0.734117	3.45267	3.13659	1.10077	0.270997
MYO18B	1.48443	3.45245	2.39757	1.43998	0.149874
LOC107984757	396.2	3.45015	1.14681	3.00848
FYB2	1.50645	3.45012	2.41849	1.42656	0.153706
LOC102724858	1.52307	3.45006	2.41128	1.4308	0.152488
SCGB3A2	0.730195	3.44526	3.13679	1.09834	0.272057
TNS3	0.733193	3.44296	3.13686	1.09758	0.272388
LOC105373707	0.733193	3.44296	3.13686	1.09758	0.272388
LOC101927268	0.728704	3.44245	3.13687	1.09741	0.27246
LOC107984361	1.94443	3.44133	2.75466	1.24928	0.211564
LOC100131625	10.185	3.44113	2.38952	1.44009
GLI3	0.732114	3.43989	2.76667	1.24333	0.213746
MIR20B	0.732114	3.43989	2.76667	1.24333	0.213746
LOC105369421	1.06687	3.43941	1.85094	1.8582	0.0631407
LOC105373724	0.726273	3.43782	3.137	1.09589	0.273125
LOC105377882	0.726273	3.43782	3.137	1.09589	0.273125
LOC105373234	0.726135	3.43757	3.13701	1.09581	0.273161
CFAP299	1.49983	3.43481	2.04816	1.67702	0.0935388
TMEM238L	0.723566	3.43267	3.13714	1.0942	0.273866
LOC105378848	0.728192	3.43247	2.77068	1.23886	0.215399
LOC105370918	1.91543	3.42782	2.36427	1.44984	0.147102
HHIP	4.42542	3.4258	1.78543	1.91876	0.0550148
PLCH1	2.34674	3.42542	1.95607	1.75117	0.0799158
LOC101929154	2.36289	3.42494	1.59369	2.14907	0.0316292
KRT8P21	0.718428	3.42284	3.13742	1.09097	0.275285
MGAT4D	0.718428	3.42284	3.13742	1.09097	0.275285
POM121L4P	0.718428	3.42284	3.13742	1.09097	0.275285
SERBP1P3	0.718428	3.42284	3.13742	1.09097	0.275285
BMS1P16	0.718428	3.42284	3.13742	1.09097	0.275285
OSBPL9P6	0.718428	3.42284	3.13742	1.09097	0.275285
LINC01885	0.718428	3.42284	3.13742	1.09097	0.275285
LOC105377483	0.718428	3.42284	3.13742	1.09097	0.275285
LOC107985441	0.718428	3.42284	3.13742	1.09097	0.275285
LINC01833	0.718428	3.42284	3.13742	1.09097	0.275285
LOC100505498	2.02671	3.42256	2.29214	1.49318	0.135391
SUMO2P11	0.722916	3.42253	2.8089	1.21846	0.223049
LOC100131395	1.05488	3.42215	2.21634	1.54405	0.122576
PCAT5	0.726189	3.42128	3.13746	1.09046	0.275511
AKIRIN2P1	0.724836	3.41865	3.13754	1.0896	0.275891
LPL	0.720347	3.41827	3.13755	1.08947	0.275946
TRIM48	0.720347	3.41827	3.13755	1.08947	0.275946
DACT2	0.720347	3.41827	3.13755	1.08947	0.275946
TENT5D	0.720347	3.41827	3.13755	1.08947	0.275946
TCTEX1D1	0.720347	3.41827	3.13755	1.08947	0.275946
LOC344967	0.720347	3.41827	3.13755	1.08947	0.275946
LOC100506675	0.720347	3.41827	3.13755	1.08947	0.275946
LOC102724419	0.720347	3.41827	3.13755	1.08947	0.275946
LOC105369452	0.720347	3.41827	3.13755	1.08947	0.275946
LOC105371351	0.720347	3.41827	3.13755	1.08947	0.275946
LOC105374040	0.720347	3.41827	3.13755	1.08947	0.275946
LOC105374666	0.720347	3.41827	3.13755	1.08947	0.275946
LOC107984496	0.720347	3.41827	3.13755	1.08947	0.275946
LOC107986948	0.720347	3.41827	3.13755	1.08947	0.275946
LOC107987113	0.720347	3.41827	3.13755	1.08947	0.275946
LOC107987178	0.720347	3.41827	3.13755	1.08947	0.275946
LOC112267914	0.720347	3.41827	3.13755	1.08947	0.275946
LOC112268424	0.720347	3.41827	3.13755	1.08947	0.275946
CCDC190	1.91526	3.41613	2.33347	1.46397	0.143202
LOC105370481	0.722267	3.41364	3.13768	1.08795	0.276617
LINC01907	7.89879	3.41215	1.10703	3.08226	0.00205433
LOC105378796	4.64289	3.40745	1.65719	2.05617	0.0397662
LOC105374128	2.69221	3.405	1.69332	2.01084	0.0443424
DLG2-AS2	2.00138	3.39882	2.29822	1.47889	0.139169
LRCH2	1.47642	3.39669	2.06647	1.64371	0.100235
LHX4-AS1	37.4261	3.39622	0.891408	3.80994	0.000138998
LOC102724479	0.708789	3.39603	2.79989	1.21292	0.225162
ACTN2	1.45003	3.39374	2.41064	1.40782	0.159185
TP63	3.26346	3.38855	1.61363	2.09995	0.0357332
LOC100128673	1.97814	3.38697	2.02811	1.67002	0.0949158
MAOA	14.2645	3.3806	1.18426	2.8546	0.00430911
GCNT3	1.4608	3.37977	2.04832	1.65002	0.0989387
LOC105379327	1.38536	3.37619	2.0276	1.66512	0.0958895
TMEM74	0.702863	3.3759	3.13876	1.07555	0.282128
LOC107985427	0.702863	3.3759	3.13876	1.07555	0.282128
CLNK	4.0303	3.3746	1.58736	2.12592	0.0335098
LOC105378641	0.700157	3.37048	3.13892	1.07377	0.282925
LOC105375696	1.41437	3.36729	2.47512	1.36045	0.173686
TTPA	1.45109	3.36713	2.45797	1.36988	0.170724
ROBO4	0.693099	3.36524	3.13907	1.07205	0.283698
MEGF10	0.693099	3.36524	3.13907	1.07205	0.283698
RSPO1	0.693099	3.36524	3.13907	1.07205	0.283698
LINC01446	0.693099	3.36524	3.13907	1.07205	0.283698
NACAP10	0.693099	3.36524	3.13907	1.07205	0.283698
LINC01134	0.693099	3.36524	3.13907	1.07205	0.283698
LOC105370849	0.693099	3.36524	3.13907	1.07205	0.283698
LOC105375953	0.693099	3.36524	3.13907	1.07205	0.283698
LOC107984256	0.693099	3.36524	3.13907	1.07205	0.283698
TBC1D9	0.695018	3.36012	3.13922	1.07037	0.284454
HSPA8P14	0.695018	3.36012	3.13922	1.07037	0.284454
ATP5MC1P7	0.695018	3.36012	3.13922	1.07037	0.284454
LOC101929413	0.695018	3.36012	3.13922	1.07037	0.284454
LOC105375382	0.695018	3.36012	3.13922	1.07037	0.284454
LOC107985920	0.695018	3.36012	3.13922	1.07037	0.284454
HNRNPA1P6	1.44325	3.35819	2.46043	1.36488	0.172292
EPHA5	3.19712	3.34686	1.90898	1.75322	0.0795643
PCAT18	7.58328	3.33144	1.58599	2.10054	0.0356813
OR51E2	0.679537	3.32918	3.14014	1.0602	0.289053
LINC00923	0.679537	3.32918	3.14014	1.0602	0.289053
XKR4	4.03497	3.32756	1.41353	2.35408	0.0185688
MLXP1	0.970578	3.32511	2.62862	1.26496	0.205885
LOC107986273	1.34775	3.31961	2.07043	1.60335	0.108858
HSPA8P16	0.669981	3.31959	3.14043	1.05705	0.290488
LOC105374111	0.669981	3.31959	3.14043	1.05705	0.290488
LINC02679	0.669981	3.31959	3.14043	1.05705	0.290488
LOC107987069	0.669981	3.31959	3.14043	1.05705	0.290488
RPL19P6	0.989619	3.31808	1.89376	1.75211	0.079755
APELA	1.34575	3.31388	2.47164	1.34076	0.179998
COX6B1P1	0.671693	3.31159	2.89033	1.14575	0.251899
SEMA6C	2.18154	3.31136	1.93275	1.71329	0.08666
RPS15AP37	0.670339	3.3088	2.89191	1.14416	0.252559
RANBP17	5.51357	3.30728	1.59964	2.06752	0.0386856
BCAT2	0.663215	3.30561	3.14085	1.05246	0.292589
LOC105375265	1.35076	3.30505	2.16278	1.52815	0.126476
C7	0.66777	3.30473	3.14088	1.05217	0.292722
EPHA7	0.66777	3.30473	3.14088	1.05217	0.292722
CCL16	0.66777	3.30473	3.14088	1.05217	0.292722
RPSAP3	0.66777	3.30473	3.14088	1.05217	0.292722
BTBD7P1	0.66777	3.30473	3.14088	1.05217	0.292722
HDAC1P2	0.66777	3.30473	3.14088	1.05217	0.292722
KANK1P1	0.66777	3.30473	3.14088	1.05217	0.292722
LOC101929322	0.66777	3.30473	3.14088	1.05217	0.292722
LOC105371191	0.66777	3.30473	3.14088	1.05217	0.292722
LOC105372424	0.66777	3.30473	3.14088	1.05217	0.292722
FGF5	1.89451	3.30358	1.97515	1.67257	0.0944116
LOC105375864	0.662137	3.30335	3.14092	1.05172	0.29293
LINC02818	0.661862	3.3028	3.14093	1.05154	0.293013
SLC9C2	1.89622	3.30264	2.3399	1.41145	0.158113
MACROD2	0.996192	3.29999	2.28874	1.44184	0.149348
LOC105372200	1.38683	3.29816	2.43506	1.35444	0.175595
LOC643015	0.659155	3.29717	3.14111	1.04968	0.293864
RPL19P13	0.986428	3.29623	2.63452	1.25117	0.210872
HSD17B3	0.658214	3.29517	3.14117	1.04903	0.294166
HSPE1P17	0.988347	3.2912	2.64151	1.24595	0.212782
LOC112267905	443.815	3.2881	1.13475	2.89765
SDAD1P2	0.654292	3.28694	3.14142	1.04632	0.295412
IL6	0.656211	3.28105	3.1416	1.04439	0.296307
LOC112268025	0.656211	3.28105	3.1416	1.04439	0.296307
LOC105369833	1.82997	3.28	2.33691	1.40356	0.16045
COL5A1	0.65037	3.27867	3.14168	1.04361	0.296667
HHLA3-AS1	0.65037	3.27867	3.14168	1.04361	0.296667
LOC105376926	0.65037	3.27867	3.14168	1.04361	0.296667
LOC112268080	0.974869	3.27864	2.22292	1.47493	0.140232
NOSTRIN	0.956509	3.27864	2.23549	1.46663	0.142476
LOC101927666	1.33183	3.278	2.04779	1.60075	0.109432
LOC402715	1.33314	3.27753	2.06428	1.58774	0.112345
LOC105373848	0.648879	3.27553	3.14177	1.04257	0.297145
IL5	1.32358	3.27497	2.05092	1.59683	0.110304
LNCOG	1.31458	3.27413	2.12188	1.54303	0.122823
LOC105375181	0.961268	3.27344	2.65455	1.23314	0.217523
PLD6	175.668	3.27309	0.984299	3.3253
LOC107984385	0.646447	3.27036	3.14193	1.04088	0.297933
GP2	0.969456	3.27023	2.22531	1.46956	0.14168
AIF1L	0.64631	3.27008	3.14194	1.04078	0.297976
LOC105375490	0.64631	3.27008	3.14194	1.04078	0.297976
PAICSP3	0.650798	3.26952	3.14196	1.0406	0.298062
TARM1	2.12278	3.26868	1.94361	1.68176	0.0926155
ADAMTS3	1.30089	3.26596	2.48208	1.31582	0.188235
NTNG1	2.65332	3.26469	1.88448	1.7324	0.0832017
LOC642381	0.643741	3.26461	3.14211	1.03898	0.298812
LOC105375905	0.643741	3.26461	3.14211	1.03898	0.298812
LOC100533635	1.30281	3.26284	2.48188	1.31466	0.188623
LOC105374943	1.3615	3.26265	2.45105	1.33112	0.183148
TRMT9B	1.85349	3.26254	2.0017	1.62988	0.103127
NPFFR1	2.42261	3.26134	1.89999	1.71651	0.0860693
OLAH	142.722	3.26057	0.628551	5.18743	2.13211e-07
LOC105376192	1.83981	3.25539	2.3411	1.39054	0.164366
FUT2	0.644444	3.2551	2.91506	1.11665	0.264145
WASF3	0.644444	3.2551	2.91506	1.11665	0.264145
EPHB2	0.638603	3.2536	3.14246	1.03537	0.300497
RGR	0.638603	3.2536	3.14246	1.03537	0.300497
XYLB	0.638603	3.2536	3.14246	1.03537	0.300497
LMCD1	0.638603	3.2536	3.14246	1.03537	0.300497
PKD1L2	0.638603	3.2536	3.14246	1.03537	0.300497
PSMC6P2	0.638603	3.2536	3.14246	1.03537	0.300497
LINC01551	0.638603	3.2536	3.14246	1.03537	0.300497
LOC389249	0.638603	3.2536	3.14246	1.03537	0.300497
LOC646120	0.638603	3.2536	3.14246	1.03537	0.300497
ARL6IP1P3	0.638603	3.2536	3.14246	1.03537	0.300497
MUC8	0.638603	3.2536	3.14246	1.03537	0.300497
VPS35P1	0.638603	3.2536	3.14246	1.03537	0.300497
LOC100431175	0.638603	3.2536	3.14246	1.03537	0.300497
MRLN	0.638603	3.2536	3.14246	1.03537	0.300497
LOC101927025	0.638603	3.2536	3.14246	1.03537	0.300497
LOC102724711	0.638603	3.2536	3.14246	1.03537	0.300497
LOC105369468	0.638603	3.2536	3.14246	1.03537	0.300497
LOC105370077	0.638603	3.2536	3.14246	1.03537	0.300497
LOC105370119	0.638603	3.2536	3.14246	1.03537	0.300497
LINC02533	0.638603	3.2536	3.14246	1.03537	0.300497
LOC107985706	0.638603	3.2536	3.14246	1.03537	0.300497
LOC107986850	0.638603	3.2536	3.14246	1.03537	0.300497
RPEL1	3.67035	3.25063	1.26361	2.57249	0.0100969
TGFB2	0.640522	3.24735	3.14266	1.03331	0.301458
UBE3AP2	0.640522	3.24735	3.14266	1.03331	0.301458
MIR1915HG	0.640522	3.24735	3.14266	1.03331	0.301458
C15orf56	0.640522	3.24735	3.14266	1.03331	0.301458
CASC6	0.640522	3.24735	3.14266	1.03331	0.301458
LOC102724153	0.640522	3.24735	3.14266	1.03331	0.301458
LOC105370586	0.640522	3.24735	3.14266	1.03331	0.301458
LOC105375855	0.640522	3.24735	3.14266	1.03331	0.301458
LOC105375874	0.640522	3.24735	3.14266	1.03331	0.301458
LOC105377369	0.640522	3.24735	3.14266	1.03331	0.301458
LOC105379377	0.640522	3.24735	3.14266	1.03331	0.301458
LOC105378609	1.30596	3.24646	2.10011	1.54585	0.12214
GPM6A	1.33812	3.24581	2.46575	1.31636	0.188054
FABP1	0.642441	3.24097	3.14286	1.03122	0.302439
MTNR1A	0.642441	3.24097	3.14286	1.03122	0.302439
PON1	0.642441	3.24097	3.14286	1.03122	0.302439
TRPC4	0.642441	3.24097	3.14286	1.03122	0.302439
COL14A1	0.642441	3.24097	3.14286	1.03122	0.302439
CFHR3	0.642441	3.24097	3.14286	1.03122	0.302439
LILRA4	0.642441	3.24097	3.14286	1.03122	0.302439
ARMC4	0.642441	3.24097	3.14286	1.03122	0.302439
RLFP1	0.642441	3.24097	3.14286	1.03122	0.302439
GPR101	0.642441	3.24097	3.14286	1.03122	0.302439
AKR1E2	0.642441	3.24097	3.14286	1.03122	0.302439
TRIM51GP	0.642441	3.24097	3.14286	1.03122	0.302439
C1orf87	0.642441	3.24097	3.14286	1.03122	0.302439
UBE2QL1	0.642441	3.24097	3.14286	1.03122	0.302439
LINC00410	0.642441	3.24097	3.14286	1.03122	0.302439
FAM81B	0.642441	3.24097	3.14286	1.03122	0.302439
GALNTL5	0.642441	3.24097	3.14286	1.03122	0.302439
FAM71C	0.642441	3.24097	3.14286	1.03122	0.302439
PDILT	0.642441	3.24097	3.14286	1.03122	0.302439
LINC00710	0.642441	3.24097	3.14286	1.03122	0.302439
LOC286083	0.642441	3.24097	3.14286	1.03122	0.302439
LINC00632	0.642441	3.24097	3.14286	1.03122	0.302439
CES1P2	0.642441	3.24097	3.14286	1.03122	0.302439
CLEC12A-AS1	0.642441	3.24097	3.14286	1.03122	0.302439
KPNA2P2	0.642441	3.24097	3.14286	1.03122	0.302439
SNF8P1	0.642441	3.24097	3.14286	1.03122	0.302439
LINC01915	0.642441	3.24097	3.14286	1.03122	0.302439
LINC01776	0.642441	3.24097	3.14286	1.03122	0.302439
COL4A2-AS2	0.642441	3.24097	3.14286	1.03122	0.302439
CAPZA1P4	0.642441	3.24097	3.14286	1.03122	0.302439
OSBPL9P1	0.642441	3.24097	3.14286	1.03122	0.302439
THRAP3P3	0.642441	3.24097	3.14286	1.03122	0.302439
PPP1R26-AS1	0.642441	3.24097	3.14286	1.03122	0.302439
PTPRT-AS1	0.642441	3.24097	3.14286	1.03122	0.302439
LOC101927871	0.642441	3.24097	3.14286	1.03122	0.302439
LOC101927872	0.642441	3.24097	3.14286	1.03122	0.302439
LOC102724521	0.642441	3.24097	3.14286	1.03122	0.302439
LOC105369405	0.642441	3.24097	3.14286	1.03122	0.302439
LOC105369408	0.642441	3.24097	3.14286	1.03122	0.302439
LOC105370261	0.642441	3.24097	3.14286	1.03122	0.302439
LOC105371204	0.642441	3.24097	3.14286	1.03122	0.302439
LOC105371600	0.642441	3.24097	3.14286	1.03122	0.302439
LOC105371723	0.642441	3.24097	3.14286	1.03122	0.302439
LOC105371833	0.642441	3.24097	3.14286	1.03122	0.302439
LOC105372546	0.642441	3.24097	3.14286	1.03122	0.302439
LINC01889	0.642441	3.24097	3.14286	1.03122	0.302439
LOC105375091	0.642441	3.24097	3.14286	1.03122	0.302439
LOC105376101	0.642441	3.24097	3.14286	1.03122	0.302439
LOC105376126	0.642441	3.24097	3.14286	1.03122	0.302439
LOC105376635	0.642441	3.24097	3.14286	1.03122	0.302439
LOC105377003	0.642441	3.24097	3.14286	1.03122	0.302439
LOC107985263	0.642441	3.24097	3.14286	1.03122	0.302439
LOC107986400	0.642441	3.24097	3.14286	1.03122	0.302439
LINC01863	0.642441	3.24097	3.14286	1.03122	0.302439
LOC107986742	0.642441	3.24097	3.14286	1.03122	0.302439
LOC107986777	0.642441	3.24097	3.14286	1.03122	0.302439
LOC107986907	0.642441	3.24097	3.14286	1.03122	0.302439
LOC107987259	0.642441	3.24097	3.14286	1.03122	0.302439
LINC01930	0.642441	3.24097	3.14286	1.03122	0.302439
LOC100422194	1.33747	3.23945	2.09707	1.54475	0.122407
FREM1	2.47781	3.23571	1.98162	1.63286	0.102498
LOC105370921	1.81448	3.22853	2.34753	1.37528	0.169044
ENTPD3	1.70141	3.22697	2.00792	1.60712	0.108028
LOC645544	0.630179	3.22507	2.9098	1.10835	0.267712
RAB3B	3.4509	3.22474	1.59865	2.01717	0.0436783
OR52B6	0.628826	3.22212	2.91156	1.10666	0.26844
LOC105373648	3.64406	3.22148	1.61553	1.99407	0.0461444
LOC105371814	0.626119	3.21654	3.14364	1.02319	0.306218
PGGT1BP2	0.934708	3.21629	2.30848	1.39325	0.163543
OR8K1	1.73238	3.21129	2.19144	1.46538	0.142816
LOC102725116	1.79508	3.20949	2.01741	1.5909	0.111633
SUMO1P2	1.27829	3.20575	1.96269	1.63334	0.102398
LOC105375980	0.621119	3.20515	2.92171	1.09701	0.272636
LOC730100	2.30345	3.20514	1.72193	1.86136	0.0626935
EEF1A1P24	1.74491	3.20396	1.69488	1.89037	0.0587084
PNPLA10P	0.91542	3.20381	2.68556	1.19298	0.232878
LOC105369690	3.6905	3.19928	1.31199	2.4385	0.0147482
RPL7L1P13	0.617196	3.19648	2.95869	1.08037	0.279977
LOC107985174	1.307	3.19575	2.47047	1.29358	0.19581
IMPDH1P1	0.906068	3.19523	2.2644	1.41107	0.158223
CER1	1.67216	3.19433	2.01314	1.58674	0.112572
FSD1L	2.51466	3.19421	1.62737	1.9628	0.0496692
ZNF33BP1	0.615843	3.19347	2.96051	1.07869	0.280726
LOC100652813	1.25023	3.19258	2.52531	1.26424	0.206146
ADCY6	0.613274	3.18783	3.14458	1.01375	0.310701
MOCS3P1	0.613274	3.18783	3.14458	1.01375	0.310701
BLID	0.613274	3.18783	3.14458	1.01375	0.310701
HNRNPA1P67	0.613274	3.18783	3.14458	1.01375	0.310701
RARS1P1	0.613274	3.18783	3.14458	1.01375	0.310701
LOC105369315	0.613274	3.18783	3.14458	1.01375	0.310701
LOC105371877	0.613274	3.18783	3.14458	1.01375	0.310701
LOC105375688	0.613274	3.18783	3.14458	1.01375	0.310701
LOC105376325	0.613274	3.18783	3.14458	1.01375	0.310701
RPP25	0.615193	3.18075	3.14482	1.01143	0.311812
LINC00841	0.615193	3.18075	3.14482	1.01143	0.311812
LOC107986944	0.615193	3.18075	3.14482	1.01143	0.311812
LOC107984758	31.6093	3.18051	1.47545	2.15562
LOC101928553	2.75612	3.17999	1.39184	2.28474	0.0223283
LOC105375971	1.72482	3.17513	2.37419	1.33735	0.181108
ECM2	1.73697	3.17512	2.37135	1.33895	0.180587
LOC105371354	1.69165	3.1723	1.80974	1.75291	0.0796183
MYZAP	0.889163	3.16209	3.13338	1.00916	0.312897
LOC105370114	1.22107	3.16125	2.5204	1.25427	0.209745
ITGA8	1.25503	3.16121	2.50056	1.2642	0.206157
MFSD4A-AS1	1.27976	3.16119	2.48659	1.2713	0.203624
MOBP	1.63706	3.16085	2.0189	1.56563	0.117436
LOC107984617	2.83859	3.16044	1.3686	2.30925	0.0209295
RPL7P11	0.894241	3.15815	2.70617	1.16702	0.243203
MUC17	1.25063	3.15759	2.51048	1.25776	0.208478
TEX41	1.98872	3.15257	1.95695	1.61096	0.107188
LOC105373042	1.70224	3.15173	2.02903	1.55332	0.120347
ATRIP-TREX1	293.993	3.15151	2.03201	1.55093	0.120918
LOC105378976	2.83327	3.1488	1.64271	1.91683	0.0552592
LOC101928570	1.73465	3.14862	2.37221	1.32729	0.184412
LOC107986013	1.23732	3.14801	2.51257	1.2529	0.210242
OSTCP3	0.59387	3.14454	2.99105	1.05132	0.293113
AKR1C1	23.9168	3.14038	1.57469	1.99429
GJB3	0.59579	3.13668	3.1463	0.996943	0.318792
DEFT1P	0.59579	3.13668	3.1463	0.996943	0.318792
OR4N2	0.59579	3.13668	3.1463	0.996943	0.318792
LOC440982	0.59579	3.13668	3.1463	0.996943	0.318792
SNCA-AS1	0.59579	3.13668	3.1463	0.996943	0.318792
DEFT1P2	0.59579	3.13668	3.1463	0.996943	0.318792
HMGB3P32	0.59579	3.13668	3.1463	0.996943	0.318792
LOC105376984	0.59579	3.13668	3.1463	0.996943	0.318792
LOC107985517	0.59579	3.13668	3.1463	0.996943	0.318792
PSKH2	0.593083	3.13033	3.14652	0.994855	0.319807
NMNAT1P3	0.593083	3.13033	3.14652	0.994855	0.319807
LOC112268134	0.593083	3.13033	3.14652	0.994855	0.319807
CHTF8P1	1.23109	3.12944	2.14886	1.45632	0.145303
CAVIN2-AS1	1.67817	3.12835	2.04299	1.53126	0.125705
LOC105376980	1.25059	3.12766	2.97979	1.04962	0.293891
HOXA6	0.586234	3.12739	3.14662	0.993891	0.320276
EGFL8	0.586234	3.12739	3.14662	0.993891	0.320276
LOC105378473	0.586234	3.12739	3.14662	0.993891	0.320276
RPL17P26	0.586026	3.12604	3.14666	0.993447	0.320492
LOC105376942	1.25251	3.12582	2.50832	1.24618	0.212697
SLC10A5P1	0.874838	3.12503	2.30882	1.35352	0.17589
SYNE4	3.7041	3.12352	1.83978	1.69776	0.0895522
EYA1	3.07884	3.12327	1.8991	1.64461	0.100051
RPL7AP11	0.870325	3.12282	2.04418	1.52766	0.126596
SCIMP	1.21757	3.12199	2.52086	1.23846	0.215546
LOC105370804	1.22339	3.12197	2.51739	1.24016	0.214916
MYH15	1.22971	3.12195	2.51365	1.242	0.214238
FGF14-IT1	1.22971	3.12195	2.51365	1.242	0.214238
LOC112268257	1.25443	3.12187	2.49927	1.24911	0.211625
LDB3	1.70741	3.12168	2.37857	1.31242	0.189379
IGHG2	1.65595	3.12087	2.8488	1.0955	0.273296
MGAT4EP	1.65595	3.12087	2.8488	1.0955	0.273296
LOC105376313	1.67416	3.12083	2.842	1.09811	0.272155
GK2	0.587945	3.11816	3.14693	0.990857	0.321755
KCNK2	0.587945	3.11816	3.14693	0.990857	0.321755
SERPINB13	0.587945	3.11816	3.14693	0.990857	0.321755
AKR1D1	0.587945	3.11816	3.14693	0.990857	0.321755
OR1G1	0.587945	3.11816	3.14693	0.990857	0.321755
TRIM64	0.587945	3.11816	3.14693	0.990857	0.321755
OR8S1	0.587945	3.11816	3.14693	0.990857	0.321755
GNAT3	0.587945	3.11816	3.14693	0.990857	0.321755
LINC01567	0.587945	3.11816	3.14693	0.990857	0.321755
LINC01538	0.587945	3.11816	3.14693	0.990857	0.321755
RPL23P5	0.587945	3.11816	3.14693	0.990857	0.321755
PIRT	0.587945	3.11816	3.14693	0.990857	0.321755
TEX50	0.587945	3.11816	3.14693	0.990857	0.321755
LOC100129367	0.587945	3.11816	3.14693	0.990857	0.321755
UBE2FP2	0.587945	3.11816	3.14693	0.990857	0.321755
LINC01043	0.587945	3.11816	3.14693	0.990857	0.321755
HINT2P1	0.587945	3.11816	3.14693	0.990857	0.321755
LOC105374253	0.587945	3.11816	3.14693	0.990857	0.321755
LOC105376450	0.587945	3.11816	3.14693	0.990857	0.321755
LOC105376755	0.587945	3.11816	3.14693	0.990857	0.321755
LINC02507	0.587945	3.11816	3.14693	0.990857	0.321755
LOC107985896	0.587945	3.11816	3.14693	0.990857	0.321755
GEMIN7-AS1	1.22137	3.1156	2.22218	1.40205	0.160902
KIAA0087	0.580821	3.1147	3.14705	0.989719	0.322312
LOC339352	0.580821	3.1147	3.14705	0.989719	0.322312
LOC105375161	2.21604	3.11468	2.01993	1.54198	0.12308
ART3	1.65321	3.11323	2.01997	1.54122	0.123262
LRRC49	1.22859	3.11184	1.89729	1.64015	0.100974
LOC105369919	2.44472	3.11164	1.94504	1.59978	0.109647
CACNA2D1	7.23059	3.10937	1.65792	1.87547	0.0607285
LOC102724745	2.11391	3.10725	2.30657	1.34713	0.177938
REEP2	0.576761	3.10511	3.14739	0.986568	0.323854
RPL21P3	0.576761	3.10511	3.14739	0.986568	0.323854
LOC100421202	0.576761	3.10511	3.14739	0.986568	0.323854
UQCRC2P1	0.881273	3.10476	2.72263	1.14035	0.254138
HPD	181.817	3.10292	1.10241	2.81466
LOC100533678	1.17441	3.10086	2.18284	1.42056	0.155445
OR4X1	0.574467	3.09962	3.14758	0.984764	0.32474
C4orf51	0.574467	3.09962	3.14758	0.984764	0.32474
LOC101930149	0.574467	3.09962	3.14758	0.984764	0.32474
LOC105370993	1.18026	3.09938	2.15208	1.44018	0.149816
TNR	2.87154	3.09858	2.27095	1.36444	0.172429
C4orf54	1.68016	3.09426	2.38729	1.29614	0.194928
FAXC	1.2184	3.09405	2.14152	1.44479	0.148517
LOC105377864	1.23502	3.09399	2.13342	1.45025	0.14699
LOC107984079	0.57176	3.0938	2.99219	1.03396	0.301155
ALOX12P1	0.571623	3.09286	3.14782	0.982542	0.325833
LOC105370786	0.571623	3.09286	3.14782	0.982542	0.325833
LOC107984398	1.62679	3.09211	2.40924	1.28344	0.199339
LOC101928041	3.02534	3.09122	1.87486	1.64877	0.099194
OR2C3	0.570544	3.09026	3.14791	0.981687	0.326254
MIR6763	0.570544	3.09026	3.14791	0.981687	0.326254
MIR34AHG	0.570544	3.09026	3.14791	0.981687	0.326254
LOC107985648	0.570544	3.09026	3.14791	0.981687	0.326254
LOC107985244	1.22526	3.08956	2.53947	1.21662	0.22375
PMCHL2	2.42711	3.08773	2.27026	1.36008	0.173805
PRLHR	0.569054	3.08671	3.14803	0.980519	0.32683
GUCY1B1	1.22718	3.08547	2.51039	1.22908	0.219043
C1GALT1P2	1.22718	3.08547	2.51039	1.22908	0.219043
LOC101927890	1.22718	3.08547	2.51039	1.22908	0.219043
CCDC85A	0.572464	3.08189	3.14821	0.978935	0.327612
RPS4XP8	0.572464	3.08189	3.14821	0.978935	0.327612
LINC01684	0.572464	3.08189	3.14821	0.978935	0.327612
LOC105373720	0.572464	3.08189	3.14821	0.978935	0.327612
LOC105377911	0.572464	3.08189	3.14821	0.978935	0.327612
LOC112268095	1.19238	3.08185	2.57088	1.19876	0.230623
LOC101929028	1.19806	3.08182	2.56743	1.20035	0.230002
CLDN8	1.21248	3.08174	2.55877	1.20438	0.228442
LOC101928510	1.65308	3.08166	1.79188	1.71979	0.0854703
CYP4F35P	0.566622	3.08084	3.14824	0.97859	0.327782
RPL7P29	0.566622	3.08084	3.14824	0.97859	0.327782
LINC01858	0.566622	3.08084	3.14824	0.97859	0.327782
LOC102723323	0.566622	3.08084	3.14824	0.97859	0.327782
GCKR	0.566485	3.08053	3.14825	0.978487	0.327834
RPSAP2	0.566485	3.08053	3.14825	0.978487	0.327834
LOC101928868	0.566485	3.08053	3.14825	0.978487	0.327834
LOC107985669	0.566485	3.08053	3.14825	0.978487	0.327834
LOC107987078	0.566485	3.08053	3.14825	0.978487	0.327834
TPBGL	2.10831	3.07548	1.71702	1.79118	0.0732644
SLC6A2	0.563916	3.07432	3.14847	0.976447	0.328843
LOC105374103	0.563916	3.07432	3.14847	0.976447	0.328843
ZNF536	3.28627	3.07336	1.44298	2.12987	0.0331821
RPL15P6	0.568404	3.07201	3.14856	0.975689	0.329219
POLR2KP1	0.568404	3.07201	3.14856	0.975689	0.329219
DMWD	16.1757	3.07185	0.828593	3.70731	0.000209473
MTUS2	0.5627	3.07137	3.14858	0.975477	0.329324
LOC105369957	0.5627	3.07137	3.14858	0.975477	0.329324
LOC112268147	6.2759	3.0712	1.08901	2.82018	0.00479961
CDH12	3.01633	3.06881	2.21566	1.38505	0.166036
RASSF10-DT	1.199	3.06847	2.13253	1.43889	0.150182
RPL22P20	0.564619	3.06226	3.0502	1.00395	0.315401
CA5A	0.558777	3.06184	3.14892	0.972344	0.330879
SELENOP	0.558777	3.06184	3.14892	0.972344	0.330879
ABCA12	0.558777	3.06184	3.14892	0.972344	0.330879
ARHGAP28	0.558777	3.06184	3.14892	0.972344	0.330879
TM4SF19	0.558777	3.06184	3.14892	0.972344	0.330879
ACSM4	0.558777	3.06184	3.14892	0.972344	0.330879
DPY19L2P3	0.558777	3.06184	3.14892	0.972344	0.330879
WWTR1-AS1	0.558777	3.06184	3.14892	0.972344	0.330879
LOC100287072	0.558777	3.06184	3.14892	0.972344	0.330879
ARL6IP1P1	0.558777	3.06184	3.14892	0.972344	0.330879
ZNF887P	0.558777	3.06184	3.14892	0.972344	0.330879
ZNF839P1	0.558777	3.06184	3.14892	0.972344	0.330879
LINC00423	0.558777	3.06184	3.14892	0.972344	0.330879
LOC101927495	0.558777	3.06184	3.14892	0.972344	0.330879
ZNF337-AS1	0.558777	3.06184	3.14892	0.972344	0.330879
LOC105374873	0.558777	3.06184	3.14892	0.972344	0.330879
TTTY14	4.68609	3.05833	1.39932	2.18558	0.0288461
POU2AF1	0.840424	3.05319	3.13624	0.97352	0.330295
DRD1	0.560697	3.05305	3.14924	0.969456	0.332318
RIT2	0.560697	3.05305	3.14924	0.969456	0.332318
TRIM16	0.560697	3.05305	3.14924	0.969456	0.332318
EIF4A1P1	0.560697	3.05305	3.14924	0.969456	0.332318
PBOV1	0.560697	3.05305	3.14924	0.969456	0.332318
IL33	0.560697	3.05305	3.14924	0.969456	0.332318
DEFB118	0.560697	3.05305	3.14924	0.969456	0.332318
PODN	0.560697	3.05305	3.14924	0.969456	0.332318
ZFP42	0.560697	3.05305	3.14924	0.969456	0.332318
CCDC60	0.560697	3.05305	3.14924	0.969456	0.332318
MIR1-1HG-AS1	0.560697	3.05305	3.14924	0.969456	0.332318
MAPK6P6	0.560697	3.05305	3.14924	0.969456	0.332318
OR4D9	0.560697	3.05305	3.14924	0.969456	0.332318
CCDC144NL-AS1	0.560697	3.05305	3.14924	0.969456	0.332318
ACTR3BP1	0.560697	3.05305	3.14924	0.969456	0.332318
RPL21P109	0.560697	3.05305	3.14924	0.969456	0.332318
MTRNR2L7	0.560697	3.05305	3.14924	0.969456	0.332318
LINC02031	0.560697	3.05305	3.14924	0.969456	0.332318
LOC105370363	0.560697	3.05305	3.14924	0.969456	0.332318
LOC105370409	0.560697	3.05305	3.14924	0.969456	0.332318
LOC105371557	0.560697	3.05305	3.14924	0.969456	0.332318
LOC105372683	0.560697	3.05305	3.14924	0.969456	0.332318
LOC105377119	0.560697	3.05305	3.14924	0.969456	0.332318
LOC105377654	0.560697	3.05305	3.14924	0.969456	0.332318
LINC02465	0.560697	3.05305	3.14924	0.969456	0.332318
LOC107987110	0.560697	3.05305	3.14924	0.969456	0.332318
LOC105375833	3.72654	3.04875	1.33597	2.28205	0.0224865
LOC105372263	1.14124	3.04828	2.56335	1.18918	0.23437
PDE6A	1.16307	3.04825	2.54919	1.19577	0.231786
TTC6	1.16321	3.04825	2.5491	1.19581	0.23177
LOC107983976	1.19993	3.0482	2.52612	1.20667	0.227558
C14orf132	1.20185	3.04395	2.5424	1.19728	0.231199
WDR17	1.57058	3.03787	2.4266	1.25191	0.210604
DDX53	1.16173	3.03678	2.54073	1.19524	0.231995
EMX1	1.56673	3.03552	1.7306	1.75403	0.0794255
LOC105378685	1.6295	3.03318	2.43378	1.24628	0.21266
LOC107984317	1.99395	3.02975	1.45119	2.08776	0.0368196
LINC01754	1.19029	3.02797	2.53885	1.19266	0.233004
ALDOAP2	0.547785	3.02158	3.07693	0.982012	0.326094
RPL21P38	0.546431	3.01813	3.05635	0.987495	0.3234
LOC105373821	2.00904	3.01525	2.34161	1.28768	0.197857
OPHN1	0.820907	3.01431	2.0682	1.45746	0.144991
MARCHF10	1.17076	3.01238	3.02954	0.994336	0.320059
LOC105378512	1.14604	3.01232	3.04898	0.987974	0.323165
SH3PXD2B	1.1339	3.01229	3.05875	0.984809	0.324718
LOC105377280	5.26468	3.01112	1.80016	1.67269	0.0943874
LINC02012	0.824858	3.01064	3.13742	0.959592	0.337261
GABRR1	1.17268	3.01	2.54807	1.18128	0.23749
LOC107984606	1.17268	3.01	2.54807	1.18128	0.23749
NOL4	1.59841	3.00887	2.43267	1.23686	0.21614
LOC105377056	1.56325	3.00637	2.42152	1.24152	0.214412
ZYG11A	1.1518	3.00583	3.05756	0.98308	0.325568
LOC101927811	1.17652	3.00569	3.03828	0.989272	0.32253
SULT1C2	1.1746	3.00542	2.54551	1.18068	0.237731
ERVV-2	0.826777	3.0053	2.76452	1.0871	0.276994
SLC17A1	0.541293	3.00514	3.06479	0.980535	0.326822
L1TD1	0.541293	3.00514	3.06479	0.980535	0.326822
MIR105-1	0.541293	3.00514	3.06479	0.980535	0.326822
MIR19B2	0.541293	3.00514	3.06479	0.980535	0.326822
LOC100131280	0.541293	3.00514	3.06479	0.980535	0.326822
OVCH2	1.54888	3.00495	2.89195	1.03907	0.298771
LOC112267917	0.541156	3.00486	3.08779	0.97314	0.330484
VSX1	1.60417	3.00484	2.87304	1.04587	0.295619
LOC105379170	1.60225	3.00388	2.42952	1.23641	0.216307
RPL5P4	2.50266	3.003	1.45248	2.0675	0.0386873
LOC101927825	0.538587	2.99827	3.0693	0.976858	0.32864
LOC105372930	3.11809	2.9968	1.54414	1.94075	0.0522882
SOWAHC	2.16826	2.99279	1.64632	1.81786	0.0690851
GPC5-AS1	0.536018	2.99174	3.09636	0.966212	0.333938
LOC105374524	2.36911	2.98911	1.9987	1.49552	0.134778
RPL21P71	1.09851	2.98848	2.19708	1.36021	0.173765
KCNH5	4.0508	2.98537	1.64921	1.81018	0.0702672
COL8A1	2.29663	2.98525	2.30974	1.29246	0.196198
ADAM3B	0.533449	2.98522	3.15175	0.947162	0.343556
S100A7	0.533449	2.98522	3.15175	0.947162	0.343556
OR7E2P	0.533449	2.98522	3.15175	0.947162	0.343556
LINC00326	0.533449	2.98522	3.15175	0.947162	0.343556
ZNF833P	0.533449	2.98522	3.15175	0.947162	0.343556
KRT8P49	0.533449	2.98522	3.15175	0.947162	0.343556
PATE3	0.533449	2.98522	3.15175	0.947162	0.343556
FRG2C	0.533449	2.98522	3.15175	0.947162	0.343556
LDHBP1	0.533449	2.98522	3.15175	0.947162	0.343556
PGBD4P2	0.533449	2.98522	3.15175	0.947162	0.343556
LOC100533723	0.533449	2.98522	3.15175	0.947162	0.343556
LINC01111	0.533449	2.98522	3.15175	0.947162	0.343556
LOC105370317	0.533449	2.98522	3.15175	0.947162	0.343556
LOC105373640	0.533449	2.98522	3.15175	0.947162	0.343556
LOC105375935	0.533449	2.98522	3.15175	0.947162	0.343556
LOC105375937	0.533449	2.98522	3.15175	0.947162	0.343556
LOC105376950	0.533449	2.98522	3.15175	0.947162	0.343556
LOC105378311	0.533449	2.98522	3.15175	0.947162	0.343556
LINC01078	0.533449	2.98522	3.15175	0.947162	0.343556
NOP56P3	0.533449	2.98522	3.15175	0.947162	0.343556
LOC107986371	0.533449	2.98522	3.15175	0.947162	0.343556
PTPN14	1.54374	2.98446	2.13754	1.39621	0.162651
LOC102724416	4.31569	2.98225	1.41617	2.10586	0.0352167
OR13D1	0.812374	2.97786	2.39429	1.24373	0.213599
CATSPERB	0.792936	2.97572	2.36293	1.25934	0.207909
ASTN1	0.535368	2.97513	3.15213	0.943846	0.345248
CLCA1	0.535368	2.97513	3.15213	0.943846	0.345248
EFNB3	0.535368	2.97513	3.15213	0.943846	0.345248
GM2AP1	0.535368	2.97513	3.15213	0.943846	0.345248
LAMC1	0.535368	2.97513	3.15213	0.943846	0.345248
ODF1	0.535368	2.97513	3.15213	0.943846	0.345248
PTPRZ1	0.535368	2.97513	3.15213	0.943846	0.345248
SERPINB3	0.535368	2.97513	3.15213	0.943846	0.345248
SLC1A1	0.535368	2.97513	3.15213	0.943846	0.345248
SLC9A3P1	0.535368	2.97513	3.15213	0.943846	0.345248
SPRR2G	0.535368	2.97513	3.15213	0.943846	0.345248
SYT1	0.535368	2.97513	3.15213	0.943846	0.345248
ABCA8	0.535368	2.97513	3.15213	0.943846	0.345248
YAP1	0.535368	2.97513	3.15213	0.943846	0.345248
IGHVII-15-1	0.535368	2.97513	3.15213	0.943846	0.345248
TRBV5-7	0.535368	2.97513	3.15213	0.943846	0.345248
RAB9B	0.535368	2.97513	3.15213	0.943846	0.345248
SPTLC3	0.535368	2.97513	3.15213	0.943846	0.345248
ARHGAP20	0.535368	2.97513	3.15213	0.943846	0.345248
APOL5	0.535368	2.97513	3.15213	0.943846	0.345248
CRISPLD1	0.535368	2.97513	3.15213	0.943846	0.345248
DDIT4L	0.535368	2.97513	3.15213	0.943846	0.345248
OR51F2	0.535368	2.97513	3.15213	0.943846	0.345248
RPL7AP27	0.535368	2.97513	3.15213	0.943846	0.345248
ASS1P3	0.535368	2.97513	3.15213	0.943846	0.345248
LRRN4	0.535368	2.97513	3.15213	0.943846	0.345248
LINC00858	0.535368	2.97513	3.15213	0.943846	0.345248
SPA17P1	0.535368	2.97513	3.15213	0.943846	0.345248
FOLH1B	0.535368	2.97513	3.15213	0.943846	0.345248
SYCP2L	0.535368	2.97513	3.15213	0.943846	0.345248
COL6A5	0.535368	2.97513	3.15213	0.943846	0.345248
LOC283028	0.535368	2.97513	3.15213	0.943846	0.345248
CCDC158	0.535368	2.97513	3.15213	0.943846	0.345248
LOC344593	0.535368	2.97513	3.15213	0.943846	0.345248
KLRG2	0.535368	2.97513	3.15213	0.943846	0.345248
IYD	0.535368	2.97513	3.15213	0.943846	0.345248
SPATA31D1	0.535368	2.97513	3.15213	0.943846	0.345248
OR11H7	0.535368	2.97513	3.15213	0.943846	0.345248
RPL7L1P5	0.535368	2.97513	3.15213	0.943846	0.345248
ZSWIM5P3	0.535368	2.97513	3.15213	0.943846	0.345248
MIR30E	0.535368	2.97513	3.15213	0.943846	0.345248
FLJ46284	0.535368	2.97513	3.15213	0.943846	0.345248
LOC441455	0.535368	2.97513	3.15213	0.943846	0.345248
RPS7P8	0.535368	2.97513	3.15213	0.943846	0.345248
GAPDHP70	0.535368	2.97513	3.15213	0.943846	0.345248
RPL21P68	0.535368	2.97513	3.15213	0.943846	0.345248
MS4A18	0.535368	2.97513	3.15213	0.943846	0.345248
PWRN2	0.535368	2.97513	3.15213	0.943846	0.345248
LOC100128776	0.535368	2.97513	3.15213	0.943846	0.345248
CDC42EP3P1	0.535368	2.97513	3.15213	0.943846	0.345248
RPL6P23	0.535368	2.97513	3.15213	0.943846	0.345248
TATDN2P3	0.535368	2.97513	3.15213	0.943846	0.345248
MIR3157	0.535368	2.97513	3.15213	0.943846	0.345248
CCDC169-SOHLH2	0.535368	2.97513	3.15213	0.943846	0.345248
KLHL7-DT	0.535368	2.97513	3.15213	0.943846	0.345248
LINC00581	0.535368	2.97513	3.15213	0.943846	0.345248
LINC01910	0.535368	2.97513	3.15213	0.943846	0.345248
LOC101927711	0.535368	2.97513	3.15213	0.943846	0.345248
LINC02660	0.535368	2.97513	3.15213	0.943846	0.345248
LOC101928222	0.535368	2.97513	3.15213	0.943846	0.345248
LOC101928398	0.535368	2.97513	3.15213	0.943846	0.345248
LOC101928735	0.535368	2.97513	3.15213	0.943846	0.345248
MCM8-AS1	0.535368	2.97513	3.15213	0.943846	0.345248
LOC102724780	0.535368	2.97513	3.15213	0.943846	0.345248
LOC102724877	0.535368	2.97513	3.15213	0.943846	0.345248
LINC02468	0.535368	2.97513	3.15213	0.943846	0.345248
LOC105369935	0.535368	2.97513	3.15213	0.943846	0.345248
LOC105370656	0.535368	2.97513	3.15213	0.943846	0.345248
LOC105370789	0.535368	2.97513	3.15213	0.943846	0.345248
LOC105371648	0.535368	2.97513	3.15213	0.943846	0.345248
LOC105372042	0.535368	2.97513	3.15213	0.943846	0.345248
LOC105372912	0.535368	2.97513	3.15213	0.943846	0.345248
LOC105373208	0.535368	2.97513	3.15213	0.943846	0.345248
LOC105373397	0.535368	2.97513	3.15213	0.943846	0.345248
LOC105373845	0.535368	2.97513	3.15213	0.943846	0.345248
LOC105374029	0.535368	2.97513	3.15213	0.943846	0.345248
LOC105374145	0.535368	2.97513	3.15213	0.943846	0.345248
LOC105374421	0.535368	2.97513	3.15213	0.943846	0.345248
LOC105375065	0.535368	2.97513	3.15213	0.943846	0.345248
LOC105375194	0.535368	2.97513	3.15213	0.943846	0.345248
LINC02830	0.535368	2.97513	3.15213	0.943846	0.345248
LOC105375639	0.535368	2.97513	3.15213	0.943846	0.345248
LOC105376209	0.535368	2.97513	3.15213	0.943846	0.345248
LOC105376479	0.535368	2.97513	3.15213	0.943846	0.345248
LOC105376589	0.535368	2.97513	3.15213	0.943846	0.345248
LOC105376874	0.535368	2.97513	3.15213	0.943846	0.345248
LOC105377024	0.535368	2.97513	3.15213	0.943846	0.345248
LINC02050	0.535368	2.97513	3.15213	0.943846	0.345248
LOC105378468	0.535368	2.97513	3.15213	0.943846	0.345248
LOC105378737	0.535368	2.97513	3.15213	0.943846	0.345248
LOC105379119	0.535368	2.97513	3.15213	0.943846	0.345248
LINC01616	0.535368	2.97513	3.15213	0.943846	0.345248
RN7SL107P	0.535368	2.97513	3.15213	0.943846	0.345248
LOC107984486	0.535368	2.97513	3.15213	0.943846	0.345248
LOC107984585	0.535368	2.97513	3.15213	0.943846	0.345248
LOC107985046	0.535368	2.97513	3.15213	0.943846	0.345248
LOC107985159	0.535368	2.97513	3.15213	0.943846	0.345248
LOC107985324	0.535368	2.97513	3.15213	0.943846	0.345248
LOC107986312	0.535368	2.97513	3.15213	0.943846	0.345248
LOC107986614	0.535368	2.97513	3.15213	0.943846	0.345248
LOC107986632	0.535368	2.97513	3.15213	0.943846	0.345248
LOC107986654	0.535368	2.97513	3.15213	0.943846	0.345248
ADAMTS5	3.69639	2.97	1.61833	1.83522	0.066473
LOC105375150	1.08866	2.96617	2.59515	1.14297	0.253052
YWHAZP1	1.14735	2.96598	2.5554	1.16067	0.245775
LINC01811	1.14735	2.96598	2.5554	1.16067	0.245775
LOC105378612	1.14735	2.96598	2.5554	1.16067	0.245775
OTOA	1.12712	2.96593	2.64462	1.1215	0.262077
LOC646588	2.2713	2.96271	2.34359	1.26418	0.206167
NYAP2	3.98263	2.9617	1.94899	1.51961	0.12861
LOC105369969	1.55169	2.96098	2.03809	1.45282	0.146274
THSD1	1.53027	2.96057	2.88939	1.02463	0.305536
RPS10P20	0.781169	2.95306	2.82258	1.04623	0.295457
LOC105370174	1.08089	2.95302	2.19995	1.34231	0.179496
LCA5	1.49054	2.94646	2.45452	1.20043	0.229974
GGT5	322.427	2.94637	1.07366	2.74422
EIF5A2P1	0.772103	2.94582	2.8428	1.03624	0.30009
GAPDHP2	0.793137	2.94562	2.81923	1.04483	0.296101
LOC112268444	1.50504	2.94306	2.06611	1.42445	0.154318
SPATA20	2.51399	2.94158	1.89532	1.55202	0.120657
LOC100132644	0.514045	2.93549	3.13465	0.936463	0.349035
CYP24A1	1.08324	2.92561	2.59648	1.12676	0.259844
LOC107984413	1.08324	2.92561	2.59648	1.12676	0.259844
B3GALNT2P1	1.12011	2.92553	2.57099	1.1379	0.255161
VANGL1	1.07775	2.92547	2.58764	1.13055	0.258243
TMEM40	2.00771	2.92367	2.37888	1.22901	0.219068
PAM16	39.0617	2.92333	0.984941	2.96803	0.00299719
LOC105375151	3.02464	2.92125	1.46169	1.99855	0.0456574
DPF3	1.08516	2.92094	2.62854	1.11124	0.266464
LOC105378374	2.92957	2.91856	1.96066	1.48856	0.136604
SLCO6A1	0.5062	2.91447	3.15449	0.923911	0.355533
LOC101060152	0.5062	2.91447	3.15449	0.923911	0.355533
LOC112267938	1.06977	2.91347	2.59629	1.12217	0.261791
SIRPG-AS1	1.06949	2.91309	2.59121	1.12422	0.26092
LINC02880	1.47373	2.90978	1.78163	1.63322	0.102424
LOC105374443	1.71701	2.90954	2.40173	1.21144	0.225727
PCDHGA10	0.502486	2.90558	3.15485	0.920991	0.357055
SLC5A11	0.502486	2.90558	3.15485	0.920991	0.357055
PAOX	0.502486	2.90558	3.15485	0.920991	0.357055
FAM230E	0.502486	2.90558	3.15485	0.920991	0.357055
TMEM18-DT	0.502486	2.90558	3.15485	0.920991	0.357055
LOC105378552	0.502486	2.90558	3.15485	0.920991	0.357055
LOC107986010	0.502486	2.90558	3.15485	0.920991	0.357055
LOC107985868	1.51381	2.90531	2.44757	1.18702	0.235221
GUCA1C	0.50812	2.90314	3.15494	0.920186	0.357475
OR5H6	0.50812	2.90314	3.15494	0.920186	0.357475
HSPE1P16	0.50812	2.90314	3.15494	0.920186	0.357475
OR8D1	0.50812	2.90314	3.15494	0.920186	0.357475
RPS13P6	0.50812	2.90314	3.15494	0.920186	0.357475
LOC112267893	0.50812	2.90314	3.15494	0.920186	0.357475
GNA14	1.0676	2.90116	2.6071	1.11279	0.265798
LOC391771	0.763969	2.89881	2.87496	1.0083	0.313313
LOC105371481	0.49978	2.89825	3.15514	0.918581	0.358315
ITGA2	1.08182	2.89729	2.61147	1.10945	0.267237
LOC107986571	1.10654	2.89714	2.59426	1.11675	0.264101
LOC646216	1.05921	2.89706	2.62981	1.10162	0.270626
STXBP6	3.26701	2.89588	1.89667	1.52683	0.126804
LOC105378180	0.498564	2.89493	3.15527	0.91749	0.358886
TRIM50	0.498426	2.89457	3.15529	0.917373	0.358947
LOC105378340	4.89583	2.89441	1.62922	1.77657	0.0756395
POTEB3	2.08746	2.8942	2.0697	1.39837	0.162002
FGF13-AS1	13.8254	2.89282	1.13416	2.55062
OR1F1	1.07258	2.8887	2.70068	1.06962	0.284791
ATP9A	20.3646	2.88717	0.975594	2.95939	0.00308244
HAMP	0.765585	2.88497	3.14111	0.918457	0.35838
MAGEC1	0.494641	2.88421	3.15571	0.913965	0.360735
OR2Y1	0.494641	2.88421	3.15571	0.913965	0.360735
RPS3P5	0.494641	2.88421	3.15571	0.913965	0.360735
ZNF812P	1.06182	2.88402	2.61524	1.10277	0.270126
LINC01968	1.07623	2.88401	2.60485	1.10717	0.268222
LOC105372564	1.09286	2.884	2.59312	1.11217	0.266064
ELAVL3	0.494367	2.88349	3.15574	0.913731	0.360858
GSC2	0.494367	2.88349	3.15574	0.913731	0.360858
PRG3	0.494367	2.88349	3.15574	0.913731	0.360858
CGREF1	0.494367	2.88349	3.15574	0.913731	0.360858
SLC7A10	0.494367	2.88349	3.15574	0.913731	0.360858
MOXD2P	0.494367	2.88349	3.15574	0.913731	0.360858
LOC105372647	0.494367	2.88349	3.15574	0.913731	0.360858
LOC105377623	0.494367	2.88349	3.15574	0.913731	0.360858
CFHR2	1.07005	2.87882	2.6176	1.09979	0.271423
RHOBTB1	1.4971	2.87878	2.91818	0.9865	0.323888
LOC158435	1.09478	2.87868	2.60012	1.10713	0.268237
FRG1GP	1.09478	2.87868	2.60012	1.10713	0.268237
RAMP1	0.491935	2.87679	3.15336	0.912294	0.361614
MSH4	3.52328	2.87651	1.5916	1.8073	0.0707148
SHC3	1.8804	2.87521	2.0719	1.38772	0.165222
DCAF13P1	0.490719	2.87341	3.15615	0.910418	0.362602
LOC100130602	0.490719	2.87341	3.15615	0.910418	0.362602
LOC107984704	0.490719	2.87341	3.15615	0.910418	0.362602
LOC107984948	0.490719	2.87341	3.15615	0.910418	0.362602
LOC112268081	0.490719	2.87341	3.15615	0.910418	0.362602
LOC105379358	0.489228	2.86932	3.15631	0.909072	0.363312
GALR1	2.84772	2.86731	1.98243	1.44636	0.148075
ARHGAP32	4.12411	2.86687	1.21856	2.35266	0.0186395
SLC35G5	2.77787	2.86477	1.08732	2.6347	0.00842111
EPHA2	0.486797	2.86254	3.15659	0.906846	0.364488
FOLR2	0.486797	2.86254	3.15659	0.906846	0.364488
LOC105373260	0.486797	2.86254	3.15659	0.906846	0.364488
LOC105378247	0.486797	2.86254	3.15659	0.906846	0.364488
LOC110091776	0.486797	2.86254	3.15659	0.906846	0.364488
CD180	0.486659	2.86218	3.15661	0.906728	0.364551
FAM86C2P	0.486659	2.86218	3.15661	0.906728	0.364551
MIR7851	0.486659	2.86218	3.15661	0.906728	0.364551
CCND2-AS1	1.4392	2.86104	2.08627	1.37136	0.170262
LOC107984437	1.08322	2.86087	2.59924	1.10066	0.271046
LRP2	3.92617	2.85769	1.58995	1.79735	0.0722808
OIT3	0.48409	2.85502	3.1569	0.904373	0.365798
LOC105371307	0.48409	2.85502	3.1569	0.904373	0.365798
LOC107987055	1.36642	2.85317	2.11849	1.34679	0.178048
GUCY2D	10.151	2.85277	1.05137	2.71339
LOC102724880	0.482874	2.8516	3.15704	0.90325	0.366393
LOC101930665	0.488716	2.85022	3.1571	0.902797	0.366634
LOC102724934	0.488716	2.85022	3.1571	0.902797	0.366634
LL22NC03-13G6.2	0.488716	2.85022	3.1571	0.902797	0.366634
LOC105373244	0.488716	2.85022	3.1571	0.902797	0.366634
LOC105373429	0.488716	2.85022	3.1571	0.902797	0.366634
LOC105377123	0.488716	2.85022	3.1571	0.902797	0.366634
LOC105377329	2.11295	2.84986	2.01814	1.41212	0.157915
EEF1A1P20	1.07537	2.8451	2.2322	1.27457	0.202461
UBE2V1P11	0.735083	2.8434	2.13944	1.32904	0.183834
ARL14EPL	0.486009	2.84254	3.15742	0.900274	0.367974
MRPL45P2	0.486009	2.84254	3.15742	0.900274	0.367974
LOC100419161	0.486009	2.84254	3.15742	0.900274	0.367974
LOC100421409	0.486009	2.84254	3.15742	0.900274	0.367974
KIR3DL3	0.726602	2.84141	3.14246	0.904198	0.36589
LOC107984408	0.726602	2.84141	3.14246	0.904198	0.36589
LOC105375689	0.745032	2.84141	3.14246	0.904198	0.36589
RFX6	0.715687	2.84141	3.14246	0.904198	0.36589
SYNDIG1	1.06561	2.84127	2.6251	1.08235	0.279098
AOX1	0.478952	2.84059	3.1575	0.899632	0.368316
ATP1A4	0.478952	2.84059	3.1575	0.899632	0.368316
CPN2	0.478952	2.84059	3.1575	0.899632	0.368316
ID4	0.478952	2.84059	3.1575	0.899632	0.368316
IGFBP5	0.478952	2.84059	3.1575	0.899632	0.368316
LRP4	0.478952	2.84059	3.1575	0.899632	0.368316
NEFM	0.478952	2.84059	3.1575	0.899632	0.368316
PCSK2	0.478952	2.84059	3.1575	0.899632	0.368316
SRL	0.478952	2.84059	3.1575	0.899632	0.368316
FHL5	0.478952	2.84059	3.1575	0.899632	0.368316
PPP1R26	0.478952	2.84059	3.1575	0.899632	0.368316
KLK13	0.478952	2.84059	3.1575	0.899632	0.368316
IGLV5-45	0.478952	2.84059	3.1575	0.899632	0.368316
ELOVL2	0.478952	2.84059	3.1575	0.899632	0.368316
SEMA6D	0.478952	2.84059	3.1575	0.899632	0.368316
COX7BP1	0.478952	2.84059	3.1575	0.899632	0.368316
ACER1	0.478952	2.84059	3.1575	0.899632	0.368316
SLC36A2	0.478952	2.84059	3.1575	0.899632	0.368316
STRC	0.478952	2.84059	3.1575	0.899632	0.368316
SRRM3	0.478952	2.84059	3.1575	0.899632	0.368316
C9orf43	0.478952	2.84059	3.1575	0.899632	0.368316
C20orf203	0.478952	2.84059	3.1575	0.899632	0.368316
NEXMIF	0.478952	2.84059	3.1575	0.899632	0.368316
ARMS2	0.478952	2.84059	3.1575	0.899632	0.368316
GAPDHP26	0.478952	2.84059	3.1575	0.899632	0.368316
LRRC74B	0.478952	2.84059	3.1575	0.899632	0.368316
LINC00687	0.478952	2.84059	3.1575	0.899632	0.368316
LOC100130353	0.478952	2.84059	3.1575	0.899632	0.368316
SERBP1P4	0.478952	2.84059	3.1575	0.899632	0.368316
RPL6P28	0.478952	2.84059	3.1575	0.899632	0.368316
RASSF8-AS1	0.478952	2.84059	3.1575	0.899632	0.368316
LINC02078	0.478952	2.84059	3.1575	0.899632	0.368316
LINC01544	0.478952	2.84059	3.1575	0.899632	0.368316
LINC02444	0.478952	2.84059	3.1575	0.899632	0.368316
LOC101929227	0.478952	2.84059	3.1575	0.899632	0.368316
LINC02654	0.478952	2.84059	3.1575	0.899632	0.368316
LOC102724908	0.478952	2.84059	3.1575	0.899632	0.368316
LOC102724948	0.478952	2.84059	3.1575	0.899632	0.368316
LOC105369784	0.478952	2.84059	3.1575	0.899632	0.368316
LOC105370007	0.478952	2.84059	3.1575	0.899632	0.368316
LOC105370873	0.478952	2.84059	3.1575	0.899632	0.368316
LOC105372437	0.478952	2.84059	3.1575	0.899632	0.368316
LOC105372624	0.478952	2.84059	3.1575	0.899632	0.368316
LOC105372926	0.478952	2.84059	3.1575	0.899632	0.368316
LOC105373250	0.478952	2.84059	3.1575	0.899632	0.368316
LOC105374221	0.478952	2.84059	3.1575	0.899632	0.368316
LOC105374336	0.478952	2.84059	3.1575	0.899632	0.368316
LOC105375120	0.478952	2.84059	3.1575	0.899632	0.368316
ZNF775-AS1	0.478952	2.84059	3.1575	0.899632	0.368316
LOC105375835	0.478952	2.84059	3.1575	0.899632	0.368316
LOC105375861	0.478952	2.84059	3.1575	0.899632	0.368316
LOC105376121	0.478952	2.84059	3.1575	0.899632	0.368316
LOC105377110	0.478952	2.84059	3.1575	0.899632	0.368316
LOC105377148	0.478952	2.84059	3.1575	0.899632	0.368316
KCNIP1-AS1	0.478952	2.84059	3.1575	0.899632	0.368316
LOC105378148	0.478952	2.84059	3.1575	0.899632	0.368316
LOC105378606	0.478952	2.84059	3.1575	0.899632	0.368316
LOC105379675	0.478952	2.84059	3.1575	0.899632	0.368316
LOC107984031	0.478952	2.84059	3.1575	0.899632	0.368316
SULT6B2P	0.478952	2.84059	3.1575	0.899632	0.368316
LOC107985499	0.478952	2.84059	3.1575	0.899632	0.368316
SRSF3P6	0.478952	2.84059	3.1575	0.899632	0.368316
LOC107986097	0.478952	2.84059	3.1575	0.899632	0.368316
LOC107986256	0.478952	2.84059	3.1575	0.899632	0.368316
ZNF474-AS1	0.478952	2.84059	3.1575	0.899632	0.368316
LOC107987256	0.478952	2.84059	3.1575	0.899632	0.368316
LOC112268266	0.478952	2.84059	3.1575	0.899632	0.368316
KCNN3	2.88949	2.83943	1.65229	1.71849	0.0857077
LOC105375821	1.03067	2.83577	2.63464	1.07634	0.281773
FAM78B-AS1	1.03259	2.83519	3.13128	0.90544	0.365232
TET1P1	1.06945	2.83505	3.11399	0.910425	0.362598
LOC105371751	1.06945	2.83505	3.11399	0.910425	0.362598
SMPDL3A	381.506	2.83438	0.977291	2.90024	0.00372873
FAM171B	0.717606	2.83436	2.88348	0.982963	0.325626
LOC105369846	0.717606	2.83436	2.88348	0.982963	0.325626
SLC25A51P3	0.746952	2.83423	2.84713	0.995468	0.319509
LINC01206	0.746952	2.83423	2.84713	0.995468	0.319509
LOC105376093	1.8547	2.83353	2.37711	1.19201	0.233259
CALM2P1	1.41614	2.83013	1.67751	1.68711	0.0915826
LINC00184	0.73335	2.82878	3.14286	0.900064	0.368086
CALD1	0.480871	2.82782	3.15804	0.895437	0.370554
FGFR3	0.480871	2.82782	3.15804	0.895437	0.370554
CCL22	0.480871	2.82782	3.15804	0.895437	0.370554
SYT13	0.480871	2.82782	3.15804	0.895437	0.370554
OR7D4	0.480871	2.82782	3.15804	0.895437	0.370554
LOC204800	0.480871	2.82782	3.15804	0.895437	0.370554
CXorf66	0.480871	2.82782	3.15804	0.895437	0.370554
MRPS21P2	0.480871	2.82782	3.15804	0.895437	0.370554
SALL4P7	0.480871	2.82782	3.15804	0.895437	0.370554
LINC01192	0.480871	2.82782	3.15804	0.895437	0.370554
FARSBP1	0.480871	2.82782	3.15804	0.895437	0.370554
DIRC3	0.480871	2.82782	3.15804	0.895437	0.370554
RPL21P132	0.480871	2.82782	3.15804	0.895437	0.370554
MIR4424	0.480871	2.82782	3.15804	0.895437	0.370554
CLYBL-AS2	0.480871	2.82782	3.15804	0.895437	0.370554
SNRPEP10	0.480871	2.82782	3.15804	0.895437	0.370554
LOC102723576	0.480871	2.82782	3.15804	0.895437	0.370554
SALRNA2	0.480871	2.82782	3.15804	0.895437	0.370554
LOC105371114	0.480871	2.82782	3.15804	0.895437	0.370554
LOC105371734	0.480871	2.82782	3.15804	0.895437	0.370554
LOC105373016	0.480871	2.82782	3.15804	0.895437	0.370554
LOC105374651	0.480871	2.82782	3.15804	0.895437	0.370554
LOC105374681	0.480871	2.82782	3.15804	0.895437	0.370554
LOC105375317	0.480871	2.82782	3.15804	0.895437	0.370554
LOC105375914	0.480871	2.82782	3.15804	0.895437	0.370554
LOC105379048	0.480871	2.82782	3.15804	0.895437	0.370554
LOC105379384	0.480871	2.82782	3.15804	0.895437	0.370554
SEPTIN14P1	0.480871	2.82782	3.15804	0.895437	0.370554
LOC107984862	0.480871	2.82782	3.15804	0.895437	0.370554
NGF	1.79105	2.81982	2.41176	1.1692	0.242324
KITLG	1.39537	2.8194	2.53023	1.11429	0.265156
MIPEPP1	1.02561	2.81649	3.13173	0.899342	0.368471
CDK15	2.91021	2.81597	1.42078	1.98198	0.047481
KCNB2	1.38368	2.81582	2.50524	1.12397	0.261024
RALYL	2.07484	2.81372	2.03682	1.38143	0.167147
LOC105374445	1.39412	2.81257	2.48833	1.1303	0.258349
ATP2C2	52.2115	2.80201	0.871487	3.2152
TANC1	3.17721	2.80139	1.6784	1.66909	0.0951004
LOC112267904	2.34245	2.80129	2.01024	1.39351	0.163464
NAP1L6P	0.702125	2.80061	2.45821	1.13929	0.254582
LINCR-0001	3.01731	2.7978	1.35644	2.06261	0.0391495
CISD1P1	2.19921	2.7968	1.5127	1.84887	0.064476
HNRNPA1P62	1.00748	2.7961	2.28641	1.22292	0.221358
LOC107985061	1.01948	2.79605	2.27882	1.22697	0.219833
OR1N1	1.04285	2.79373	2.2641	1.23393	0.21723
ADAM3A	1.01556	2.79145	2.64078	1.05705	0.290487
CALHM5	1.60801	2.78834	2.07446	1.34413	0.178907
LOC107986553	0.999546	2.78754	2.22583	1.25236	0.210439
LOC105374235	1.3842	2.7875	2.13197	1.30748	0.19105
DACH2	0.46539	2.78404	3.15991	0.88105	0.378291
RPS6P26	0.46539	2.78404	3.15991	0.88105	0.378291
LOC105373735	0.46539	2.78404	3.15991	0.88105	0.378291
LOC107986302	0.46539	2.78404	3.15991	0.88105	0.378291
MIR371B	1.75353	2.78249	2.02329	1.37523	0.169059
TRPC3	4.24769	2.7778	1.46167	1.90044	0.057376
NIP7P2	0.707342	2.77549	2.90221	0.956335	0.338903
GYS2	0.711392	2.77548	2.89697	0.958063	0.338031
PRG1	1.02845	2.77217	2.63535	1.05192	0.292836
HAO1	0.46133	2.77203	3.16043	0.877104	0.38043
MYOPARR	1.00587	2.77179	2.30949	1.20017	0.230072
PSMC1P10	1.36911	2.76974	1.99811	1.38618	0.165693
CRISP2	2.28955	2.76905	1.97253	1.4038	0.160377
LOC101929547	4.40779	2.76762	1.72261	1.60665	0.108131
LOC105376692	0.721623	2.76656	2.93004	0.944204	0.345066
KL	14.4475	2.76559	1.13332	2.44027	0.0146764
NEUROD2	0.960129	2.76506	2.68013	1.03169	0.302217
LOC105379133	1.00818	2.76463	2.23796	1.23533	0.216707
LOC105370980	1.0248	2.76458	2.22766	1.24103	0.214596
TFF3	28.5315	2.76383	1.00072	2.76185	0.00574752
CNTN3	2.52198	2.7611	1.94919	1.41654	0.156617
LOC112267896	1.34395	2.76016	2.12914	1.29637	0.194846
COL28A1	5.66414	2.75937	2.825	0.976771	0.328683
FXYD6	1.36589	2.75914	2.10993	1.30769	0.190978
PTPRT	0.996155	2.75814	2.25454	1.22337	0.221189
LOC105377375	2.00844	2.75784	2.01912	1.36586	0.171982
CCDC54	0.456192	2.75666	3.16111	0.872054	0.383179
LOC107985524	1.37345	2.75384	2.50879	1.09768	0.272346
LINC01793	1.88958	2.75226	2.39905	1.14723	0.251287
LINC02700	2.86035	2.75166	1.65161	1.66605	0.0957029
LOC105375846	1.82595	2.75165	2.44172	1.12693	0.259772
LOC105370221	0.986391	2.74989	3.13338	0.877612	0.380154
AQP7	0.453623	2.74892	3.16145	0.86951	0.384568
CDH9	0.453623	2.74892	3.16145	0.86951	0.384568
GRM8	0.453623	2.74892	3.16145	0.86951	0.384568
GYPA	0.453623	2.74892	3.16145	0.86951	0.384568
DGKI	0.453623	2.74892	3.16145	0.86951	0.384568
USH1C	0.453623	2.74892	3.16145	0.86951	0.384568
KRTAP9-4	0.453623	2.74892	3.16145	0.86951	0.384568
TBL1Y	0.453623	2.74892	3.16145	0.86951	0.384568
CDRT7	0.453623	2.74892	3.16145	0.86951	0.384568
OR10J4	0.453623	2.74892	3.16145	0.86951	0.384568
IMPDH1P9	0.453623	2.74892	3.16145	0.86951	0.384568
WEE2	0.453623	2.74892	3.16145	0.86951	0.384568
LINC02315	0.453623	2.74892	3.16145	0.86951	0.384568
ST13P20	0.453623	2.74892	3.16145	0.86951	0.384568
HNRNPA1P77	0.453623	2.74892	3.16145	0.86951	0.384568
RPL35P9	0.453623	2.74892	3.16145	0.86951	0.384568
LOC102723624	0.453623	2.74892	3.16145	0.86951	0.384568
LOC102723834	0.453623	2.74892	3.16145	0.86951	0.384568
LOC105369309	0.453623	2.74892	3.16145	0.86951	0.384568
LOC105369859	0.453623	2.74892	3.16145	0.86951	0.384568
LOC105370213	0.453623	2.74892	3.16145	0.86951	0.384568
LOC105370345	0.453623	2.74892	3.16145	0.86951	0.384568
LINC01789	0.453623	2.74892	3.16145	0.86951	0.384568
LOC105378882	0.453623	2.74892	3.16145	0.86951	0.384568
LOC112268028	0.453623	2.74892	3.16145	0.86951	0.384568
ATP13A4	2.06661	2.74883	1.70384	1.61331	0.106677
CD177P1	39.2957	2.74829	0.742106	3.70337	0.000212757
IFNLR1	1.34718	2.74737	2.5768	1.06619	0.286337
CLUL1	1.01303	2.74585	2.644	1.03852	0.299028
KRT18P66	1.01303	2.74585	2.644	1.03852	0.299028
LOC102723623	0.983687	2.74519	2.33941	1.17346	0.240613
LOC107984360	1.33494	2.74084	2.99364	0.915552	0.359902
SAA2	1.39002	2.74068	2.96859	0.923226	0.355889
UNC5A	11.2165	2.74008	0.957892	2.86053	0.00422931
LOC100101126	1.01495	2.73966	2.66897	1.02648	0.304663
LOC105371867	1.35138	2.73823	2.21121	1.23834	0.21559
CAPN9	2.00073	2.7375	2.36169	1.15913	0.246404
MYEF2	45.6989	2.73325	1.45068	1.88412	0.0595491
RYR2	2.716	2.73067	1.44567	1.88886	0.0589109
ANKRD20A19P	1.34385	2.72793	2.51764	1.08353	0.278575
HMGB1P47	0.976751	2.72629	2.26255	1.20496	0.228217
SCN1A-AS1	6.36507	2.72305	1.15502	2.35757	0.0183951
LINC01247	1.31862	2.72198	2.52555	1.07778	0.281133
LOC105370890	1.36216	2.71914	2.53262	1.07365	0.28298
TMPRSS11B	2.80813	2.71476	1.96685	1.38026	0.167508
LOC102724525	1.35634	2.7105	1.91431	1.41591	0.156802
LOC105374726	1.35702	2.71009	2.97312	0.911532	0.362015
CECR2	1.81015	2.70799	1.7886	1.51403	0.130018
LOC440489	1.34286	2.70575	1.89643	1.42676	0.153649
ATP5MC1P4	2.07746	2.70534	1.57749	1.71497	0.0863511
DCC	2.38278	2.70515	2.04676	1.32168	0.186276
CDH10	1.30578	2.70487	2.53008	1.06908	0.285033
LOC112268413	1.32377	2.70483	2.52237	1.07234	0.283568
LOC105375148	1.36086	2.70478	2.51068	1.07731	0.281342
LOC390308	1.83729	2.70017	2.09696	1.28766	0.197863
EEF1A1P27	0.436651	2.69843	3.16374	0.852924	0.393701
LSAMP	2.41162	2.69832	1.46004	1.84811	0.0645871
TMEM150C	0.97108	2.69227	2.68188	1.00387	0.315439
LOC107986974	1.76823	2.69215	2.85245	0.943805	0.345269
RBM26-AS1	3.5668	2.69096	1.92783	1.39584	0.162761
IFNA1	0.43422	2.69081	3.16409	0.850424	0.39509
LINC01152	1.61895	2.68712	2.14055	1.25534	0.209355
LOC105371347	3.66564	2.68286	1.43255	1.87279	0.0610977
DPPA2P2	15.595	2.679	1.07366	2.49521
INTU	7.15603	2.67762	1.42637	1.87723	0.0604865
RNF17	2.42838	2.67591	2.30682	1.16	0.246049
LOC105377356	1.26754	2.67557	2.23215	1.19865	0.230663
USP43	6.46744	2.67488	1.38424	1.93238	0.053312
PLPP3	76.5837	2.67262	0.628155	4.25472	2.09308e-05
F11-AS1	1.33361	2.66834	2.52019	1.05879	0.289697
CHRM2	0.426375	2.66612	3.16524	0.842313	0.399613
CFAP52	0.426375	2.66612	3.16524	0.842313	0.399613
EIF3LP1	0.426375	2.66612	3.16524	0.842313	0.399613
GAPDHP37	0.426375	2.66612	3.16524	0.842313	0.399613
LOC102724527	0.426375	2.66612	3.16524	0.842313	0.399613
LOC105378046	2.6423	2.66481	1.7007	1.56689	0.117141
LOC105369961	0.907898	2.66478	3.1356	0.849847	0.39541
LOC105379039	1.28024	2.66469	2.57755	1.03381	0.301227
TGM2	0.934011	2.66239	2.70556	0.984044	0.325094
TUBB4BP7	0.935501	2.66233	2.33644	1.13948	0.254502
P4HA3	1.26897	2.66164	3.02019	0.881285	0.378164
ROS1	1.96615	2.66028	2.05635	1.29369	0.195774
RPH3A	281.687	2.65988	0.682676	3.89626	9.76896e-05
SNORD94	0.650699	2.65987	3.00386	0.885486	0.375894
HSPA8P11	0.927703	2.65152	2.71995	0.974843	0.329638
LOC105376923	4.30463	2.65028	1.64104	1.615	0.106311
LOC105376910	0.646847	2.64964	3.14892	0.841444	0.400099
ERVV-1	1.7592	2.64957	1.5386	1.72206	0.0850581
ADCYAP1	0.428294	2.64908	3.16604	0.836715	0.402753
CHRM1	0.428294	2.64908	3.16604	0.836715	0.402753
CYLC1	0.428294	2.64908	3.16604	0.836715	0.402753
HOXD9	0.428294	2.64908	3.16604	0.836715	0.402753
HOXD12	0.428294	2.64908	3.16604	0.836715	0.402753
KNG1	0.428294	2.64908	3.16604	0.836715	0.402753
MTTP	0.428294	2.64908	3.16604	0.836715	0.402753
RHO	0.428294	2.64908	3.16604	0.836715	0.402753
SCTR	0.428294	2.64908	3.16604	0.836715	0.402753
MKRN4P	0.428294	2.64908	3.16604	0.836715	0.402753
UGT2A1	0.428294	2.64908	3.16604	0.836715	0.402753
ZNF521	0.428294	2.64908	3.16604	0.836715	0.402753
CACNG5	0.428294	2.64908	3.16604	0.836715	0.402753
PADI1	0.428294	2.64908	3.16604	0.836715	0.402753
UGT1A6	0.428294	2.64908	3.16604	0.836715	0.402753
LMO3	0.428294	2.64908	3.16604	0.836715	0.402753
CABP5	0.428294	2.64908	3.16604	0.836715	0.402753
SMOC2	0.428294	2.64908	3.16604	0.836715	0.402753
REEP1	0.428294	2.64908	3.16604	0.836715	0.402753
SPRY4	0.428294	2.64908	3.16604	0.836715	0.402753
FCRL4	0.428294	2.64908	3.16604	0.836715	0.402753
KRTAP4-2	0.428294	2.64908	3.16604	0.836715	0.402753
GPR139	0.428294	2.64908	3.16604	0.836715	0.402753
GOLT1A	0.428294	2.64908	3.16604	0.836715	0.402753
TRIM71	0.428294	2.64908	3.16604	0.836715	0.402753
FRMPD2	0.428294	2.64908	3.16604	0.836715	0.402753
LINC01854	0.428294	2.64908	3.16604	0.836715	0.402753
TMEM213	0.428294	2.64908	3.16604	0.836715	0.402753
GRAMD2A	0.428294	2.64908	3.16604	0.836715	0.402753
ERICH6B	0.428294	2.64908	3.16604	0.836715	0.402753
NALCN	0.428294	2.64908	3.16604	0.836715	0.402753
LINC02028	0.428294	2.64908	3.16604	0.836715	0.402753
C5orf64	0.428294	2.64908	3.16604	0.836715	0.402753
EIF4BP1	0.428294	2.64908	3.16604	0.836715	0.402753
LINC02260	0.428294	2.64908	3.16604	0.836715	0.402753
DCAF8L2	0.428294	2.64908	3.16604	0.836715	0.402753
LOC390306	0.428294	2.64908	3.16604	0.836715	0.402753
KRT8P29	0.428294	2.64908	3.16604	0.836715	0.402753
LOC399783	0.428294	2.64908	3.16604	0.836715	0.402753
C11orf87	0.428294	2.64908	3.16604	0.836715	0.402753
C1orf220	0.428294	2.64908	3.16604	0.836715	0.402753
NIFKP1	0.428294	2.64908	3.16604	0.836715	0.402753
RPL7L1P8	0.428294	2.64908	3.16604	0.836715	0.402753
RPL15P11	0.428294	2.64908	3.16604	0.836715	0.402753
LINC01194	0.428294	2.64908	3.16604	0.836715	0.402753
LINC02372	0.428294	2.64908	3.16604	0.836715	0.402753
EEF1B2P5	0.428294	2.64908	3.16604	0.836715	0.402753
TUBG1P	0.428294	2.64908	3.16604	0.836715	0.402753
DUXAP4	0.428294	2.64908	3.16604	0.836715	0.402753
MIR526B	0.428294	2.64908	3.16604	0.836715	0.402753
TMEM75	0.428294	2.64908	3.16604	0.836715	0.402753
AKAIN1	0.428294	2.64908	3.16604	0.836715	0.402753
LINC00535	0.428294	2.64908	3.16604	0.836715	0.402753
TPTE2P2	0.428294	2.64908	3.16604	0.836715	0.402753
RPL7P58	0.428294	2.64908	3.16604	0.836715	0.402753
LOC728158	0.428294	2.64908	3.16604	0.836715	0.402753
FAM155A	0.428294	2.64908	3.16604	0.836715	0.402753
KIAA2012-AS1	0.428294	2.64908	3.16604	0.836715	0.402753
RPL12P18	0.428294	2.64908	3.16604	0.836715	0.402753
NUDT19P1	0.428294	2.64908	3.16604	0.836715	0.402753
ST13P12	0.428294	2.64908	3.16604	0.836715	0.402753
GTF3AP5	0.428294	2.64908	3.16604	0.836715	0.402753
LOC100129293	0.428294	2.64908	3.16604	0.836715	0.402753
FAM8A3P	0.428294	2.64908	3.16604	0.836715	0.402753
LOC100129774	0.428294	2.64908	3.16604	0.836715	0.402753
RPL26P15	0.428294	2.64908	3.16604	0.836715	0.402753
LINC00624	0.428294	2.64908	3.16604	0.836715	0.402753
RTRAFP2	0.428294	2.64908	3.16604	0.836715	0.402753
SLC9B1P3	0.428294	2.64908	3.16604	0.836715	0.402753
NCAPD2P1	0.428294	2.64908	3.16604	0.836715	0.402753
THRAP3P2	0.428294	2.64908	3.16604	0.836715	0.402753
LOC100422426	0.428294	2.64908	3.16604	0.836715	0.402753
ATP5MC1P6	0.428294	2.64908	3.16604	0.836715	0.402753
LINC01603	0.428294	2.64908	3.16604	0.836715	0.402753
LINC01532	0.428294	2.64908	3.16604	0.836715	0.402753
LOC100505851	0.428294	2.64908	3.16604	0.836715	0.402753
LOC100506497	0.428294	2.64908	3.16604	0.836715	0.402753
TMEM178B	0.428294	2.64908	3.16604	0.836715	0.402753
LINC00159	0.428294	2.64908	3.16604	0.836715	0.402753
LINC00446	0.428294	2.64908	3.16604	0.836715	0.402753
OSTCP6	0.428294	2.64908	3.16604	0.836715	0.402753
LINC00690	0.428294	2.64908	3.16604	0.836715	0.402753
LOC101926908	0.428294	2.64908	3.16604	0.836715	0.402753
LINC01358	0.428294	2.64908	3.16604	0.836715	0.402753
GNA14-AS1	0.428294	2.64908	3.16604	0.836715	0.402753
LINC02388	0.428294	2.64908	3.16604	0.836715	0.402753
LINC01429	0.428294	2.64908	3.16604	0.836715	0.402753
TH2LCRR	0.428294	2.64908	3.16604	0.836715	0.402753
LINC01847	0.428294	2.64908	3.16604	0.836715	0.402753
LOC101928051	0.428294	2.64908	3.16604	0.836715	0.402753
LINC01363	0.428294	2.64908	3.16604	0.836715	0.402753
LOC101928940	0.428294	2.64908	3.16604	0.836715	0.402753
LOC101929348	0.428294	2.64908	3.16604	0.836715	0.402753
LOC101929586	0.428294	2.64908	3.16604	0.836715	0.402753
ST3GAL3-AS1	0.428294	2.64908	3.16604	0.836715	0.402753
LINC01017	0.428294	2.64908	3.16604	0.836715	0.402753
LINC01340	0.428294	2.64908	3.16604	0.836715	0.402753
LOC102723876	0.428294	2.64908	3.16604	0.836715	0.402753
LOC102724520	0.428294	2.64908	3.16604	0.836715	0.402753
LOC102724768	0.428294	2.64908	3.16604	0.836715	0.402753
LOC105369409	0.428294	2.64908	3.16604	0.836715	0.402753
LOC105369451	0.428294	2.64908	3.16604	0.836715	0.402753
LOC105369507	0.428294	2.64908	3.16604	0.836715	0.402753
LOC105369885	0.428294	2.64908	3.16604	0.836715	0.402753
LOC105369925	0.428294	2.64908	3.16604	0.836715	0.402753
LOC105370196	0.428294	2.64908	3.16604	0.836715	0.402753
LOC105370217	0.428294	2.64908	3.16604	0.836715	0.402753
LOC105370240	0.428294	2.64908	3.16604	0.836715	0.402753
LOC105370327	0.428294	2.64908	3.16604	0.836715	0.402753
LOC105370455	0.428294	2.64908	3.16604	0.836715	0.402753
LOC105370599	0.428294	2.64908	3.16604	0.836715	0.402753
LOC105370809	0.428294	2.64908	3.16604	0.836715	0.402753
LOC105371024	0.428294	2.64908	3.16604	0.836715	0.402753
LOC105371259	0.428294	2.64908	3.16604	0.836715	0.402753
LOC105371536	0.428294	2.64908	3.16604	0.836715	0.402753
LOC105371735	0.428294	2.64908	3.16604	0.836715	0.402753
LOC105372016	0.428294	2.64908	3.16604	0.836715	0.402753
LOC105372325	0.428294	2.64908	3.16604	0.836715	0.402753
LOC105372528	0.428294	2.64908	3.16604	0.836715	0.402753
LOC105372575	0.428294	2.64908	3.16604	0.836715	0.402753
LOC105372586	0.428294	2.64908	3.16604	0.836715	0.402753
LOC105372798	0.428294	2.64908	3.16604	0.836715	0.402753
LOC105373369	0.428294	2.64908	3.16604	0.836715	0.402753
LOC105373595	0.428294	2.64908	3.16604	0.836715	0.402753
LOC105373795	0.428294	2.64908	3.16604	0.836715	0.402753
LOC105374154	0.428294	2.64908	3.16604	0.836715	0.402753
LOC105374386	0.428294	2.64908	3.16604	0.836715	0.402753
LOC105374481	0.428294	2.64908	3.16604	0.836715	0.402753
LINC02063	0.428294	2.64908	3.16604	0.836715	0.402753
LOC105374659	0.428294	2.64908	3.16604	0.836715	0.402753
LOC105374686	0.428294	2.64908	3.16604	0.836715	0.402753
LOC105374701	0.428294	2.64908	3.16604	0.836715	0.402753
LOC105375581	0.428294	2.64908	3.16604	0.836715	0.402753
LINC02710	0.428294	2.64908	3.16604	0.836715	0.402753
LOC105376675	0.428294	2.64908	3.16604	0.836715	0.402753
LOC105377271	0.428294	2.64908	3.16604	0.836715	0.402753
LOC105377473	0.428294	2.64908	3.16604	0.836715	0.402753
LOC105377489	0.428294	2.64908	3.16604	0.836715	0.402753
LOC105377490	0.428294	2.64908	3.16604	0.836715	0.402753
LOC105377519	0.428294	2.64908	3.16604	0.836715	0.402753
LOC105377702	0.428294	2.64908	3.16604	0.836715	0.402753
LOC105378211	0.428294	2.64908	3.16604	0.836715	0.402753
LOC105379266	0.428294	2.64908	3.16604	0.836715	0.402753
LOC107984213	0.428294	2.64908	3.16604	0.836715	0.402753
LOC107984255	0.428294	2.64908	3.16604	0.836715	0.402753
LOC107984508	0.428294	2.64908	3.16604	0.836715	0.402753
LOC107984547	0.428294	2.64908	3.16604	0.836715	0.402753
LOC107985135	0.428294	2.64908	3.16604	0.836715	0.402753
LOC107985141	0.428294	2.64908	3.16604	0.836715	0.402753
LOC107985883	0.428294	2.64908	3.16604	0.836715	0.402753
LOC107985906	0.428294	2.64908	3.16604	0.836715	0.402753
LOC107986028	0.428294	2.64908	3.16604	0.836715	0.402753
LOC107986138	0.428294	2.64908	3.16604	0.836715	0.402753
LOC107986416	0.428294	2.64908	3.16604	0.836715	0.402753
LOC107986885	0.428294	2.64908	3.16604	0.836715	0.402753
LOC107987056	0.428294	2.64908	3.16604	0.836715	0.402753
LOC107987123	0.428294	2.64908	3.16604	0.836715	0.402753
FAM236C	0.428294	2.64908	3.16604	0.836715	0.402753
LOC112268425	0.428294	2.64908	3.16604	0.836715	0.402753
NEGR1	10.4834	2.648	0.961989	2.75263	0.00591193
LINC02371	1.63332	2.64752	2.43875	1.08561	0.277653
RNU6-428P	0.671049	2.64657	2.52592	1.04777	0.294746
LOC100130990	0.963024	2.64553	2.31519	1.14268	0.253171
SLC16A9	0.943832	2.6434	2.69478	0.980931	0.326627
LOC112267879	1.32005	2.64336	2.54551	1.03844	0.299066
BMP1	0.418738	2.64334	3.16632	0.834832	0.403813
CTNND2	0.418738	2.64334	3.16632	0.834832	0.403813
TFR2	0.418738	2.64334	3.16632	0.834832	0.403813
ACOT7	0.418738	2.64334	3.16632	0.834832	0.403813
OR1L3	0.418738	2.64334	3.16632	0.834832	0.403813
TCIM	0.418738	2.64334	3.16632	0.834832	0.403813
HTRA3	0.418738	2.64334	3.16632	0.834832	0.403813
ZG16B	0.418738	2.64334	3.16632	0.834832	0.403813
AIFM3	0.418738	2.64334	3.16632	0.834832	0.403813
CDRT4	0.418738	2.64334	3.16632	0.834832	0.403813
DNM1P33	0.418738	2.64334	3.16632	0.834832	0.403813
GOLGA6L7	0.418738	2.64334	3.16632	0.834832	0.403813
HNRNPA1P40	0.418738	2.64334	3.16632	0.834832	0.403813
AGGF1P7	0.418738	2.64334	3.16632	0.834832	0.403813
MIR4457	0.418738	2.64334	3.16632	0.834832	0.403813
CCDC74BP1	0.418738	2.64334	3.16632	0.834832	0.403813
LINC01398	0.418738	2.64334	3.16632	0.834832	0.403813
APOA1-AS	0.418738	2.64334	3.16632	0.834832	0.403813
LOC105369460	0.418738	2.64334	3.16632	0.834832	0.403813
LINC01975	0.418738	2.64334	3.16632	0.834832	0.403813
LOC105373612	0.418738	2.64334	3.16632	0.834832	0.403813
LOC105374338	0.418738	2.64334	3.16632	0.834832	0.403813
LINC01795	0.418738	2.64334	3.16632	0.834832	0.403813
LOC105375888	0.418738	2.64334	3.16632	0.834832	0.403813
LOC105378436	0.418738	2.64334	3.16632	0.834832	0.403813
LOC107986305	0.418738	2.64334	3.16632	0.834832	0.403813
PCDHB11	0.960455	2.64332	2.68065	0.986076	0.324096
LOC100287846	0.960455	2.64332	2.68065	0.986076	0.324096
LOC105377111	1.27	2.64207	2.14608	1.23111	0.21828
LRRC15	0.962374	2.641	3.13624	0.842091	0.399737
CBX3P5	0.931333	2.641	3.13624	0.842091	0.399737
LOC101927978	0.937652	2.641	3.13624	0.842091	0.399737
RN7SL481P	1.26797	2.63898	1.92112	1.37366	0.169546
LOC105376528	1.71181	2.63708	2.42692	1.08659	0.277217
LOC105377862	3.10435	2.63545	1.68955	1.55985	0.118795
PARD3B	6.22817	2.63533	2.85517	0.923002	0.356006
KCTD9P5	0.416032	2.63464	3.16673	0.831975	0.405423
LOC107984007	1.2824	2.63437	1.78448	1.47626	0.139874
LOC105372762	2.37038	2.6324	2.31932	1.13499	0.25638
LOC107984740	1.25128	2.63106	2.55544	1.02959	0.303202
LOC107984886	1.25128	2.63106	2.55544	1.02959	0.303202
LOC107985854	1.30636	2.63104	2.53408	1.03826	0.299148
LEFTY3	0.414816	2.63069	3.16692	0.830678	0.406156
RPS10P27	0.414816	2.63069	3.16692	0.830678	0.406156
LOC105370793	0.414816	2.63069	3.16692	0.830678	0.406156
ARFGEF3	2.01728	2.63027	2.3739	1.10799	0.267865
RASEF	0.946976	2.63005	2.67701	0.98246	0.325873
PID1	0.888286	2.6298	2.72978	0.963373	0.33536
LINC02066	1.81363	2.62848	2.0681	1.27097	0.20374
AOC1	60.2755	2.62832	3.00209	0.875498	0.381303
MAGI2-AS3	1.2712	2.62691	2.56262	1.02509	0.305322
ADCY1	1.28335	2.62687	2.55747	1.02714	0.304357
MFSD2B	1.30828	2.62682	2.54979	1.03021	0.302913
LOC101926898	0.413325	2.6259	3.16716	0.829103	0.407046
COL4A3	2.1271	2.62479	2.35446	1.11482	0.264929
LINC01932	6.36694	2.6234	1.15892	2.26365	0.0235957
CCL24	0.411972	2.62151	3.16737	0.827662	0.407862
HAND2	0.411972	2.62151	3.16737	0.827662	0.407862
TUBB7P	0.411972	2.62151	3.16737	0.827662	0.407862
BAHCC1	0.411972	2.62151	3.16737	0.827662	0.407862
SLC27A1	0.411972	2.62151	3.16737	0.827662	0.407862
CADM3-AS1	0.411972	2.62151	3.16737	0.827662	0.407862
UBXN10-AS1	0.411972	2.62151	3.16737	0.827662	0.407862
LOC105371899	0.411972	2.62151	3.16737	0.827662	0.407862
LINC02646	0.411972	2.62151	3.16737	0.827662	0.407862
LOC107987031	0.411972	2.62151	3.16737	0.827662	0.407862
LOC107987187	0.411972	2.62151	3.16737	0.827662	0.407862
LOC105373604	2.82524	2.62087	2.26478	1.15723	0.247179
ME2P1	3.239	2.61981	1.99744	1.31158	0.189661
LOC101927389	1.23732	2.61918	2.54721	1.02825	0.303831
PRRT1	0.410894	2.61795	3.16754	0.826493	0.408525
GAPDHP24	0.410894	2.61795	3.16754	0.826493	0.408525
CAPN14	0.410894	2.61795	3.16754	0.826493	0.408525
CDKN2B-AS1	0.410894	2.61795	3.16754	0.826493	0.408525
LOC105379143	0.410894	2.61795	3.16754	0.826493	0.408525
SNRPEP5	0.929429	2.61735	2.70843	0.966371	0.333858
LZTS2	1.44943	2.61684	2.48274	1.05401	0.291876
MAGIX	65.2238	2.61553	0.537318	4.86776	1.12872e-06
SMCO1	0.880441	2.61503	2.75885	0.94787	0.343196
LOC105372640	1.18916	2.61496	3.07027	0.851703	0.394379
CD177	1045.56	2.61478	0.510674	5.12024	3.0514e-07
RNU6-60P	40.1428	2.61437	0.801863	3.26036
ZSCAN20	1.25188	2.61395	2.55762	1.02202	0.30677
LOC100130485	0.908253	2.61349	2.31576	1.12856	0.259082
SNRPCP5	0.637207	2.61254	2.99554	0.872141	0.383131
KIAA1217	1.72056	2.61153	2.1562	1.21117	0.225831
MGAT3	1.25487	2.61116	2.16943	1.20362	0.228738
CCDC116	1.45186	2.61093	2.1029	1.24159	0.214389
TOB2P1	6.24983	2.60987	0.959907	2.71888	0.00655036
LOC101927012	1.98776	2.60823	2.36659	1.1021	0.270418
PRKN	1.193	2.60781	2.59369	1.00545	0.314682
HNRNPA1P30	0.898348	2.60754	2.78057	0.937772	0.348362
UGT2B11	0.406971	2.60511	3.16817	0.822276	0.41092
RPL39P4	0.406971	2.60511	3.16817	0.822276	0.41092
LOC102723392	0.406971	2.60511	3.16817	0.822276	0.41092
LOC102724838	0.406971	2.60511	3.16817	0.822276	0.41092
LOC105374669	0.406971	2.60511	3.16817	0.822276	0.41092
RPL11P5	0.406834	2.60468	3.16819	0.822137	0.410999
LOC105373002	0.406834	2.60468	3.16819	0.822137	0.410999
SNORD130	0.63734	2.60398	2.53647	1.02662	0.304602
LINC01500	1.25422	2.60318	2.56081	1.01655	0.30937
PRKAA2	4.68556	2.6005	1.89379	1.37318	0.169697
OR6W1P	0.872597	2.59845	3.13742	0.828212	0.40755
ICE2P1	0.894426	2.59845	3.13742	0.828212	0.40755
LOC105377984	0.914665	2.59845	3.13742	0.828212	0.40755
LOC105378563	0.931287	2.59845	3.13742	0.828212	0.40755
MYO6	2.80346	2.59751	2.2845	1.13702	0.255532
CFHR1	0.404265	2.59621	3.1686	0.819353	0.412585
LOC105374697	0.404265	2.59621	3.1686	0.819353	0.412585
LOC105377029	0.404265	2.59621	3.1686	0.819353	0.412585
ASPA	1.22211	2.59469	3.04579	0.851892	0.394274
LOC105371366	0.896345	2.59303	2.7354	0.947954	0.343153
CNNM1	0.908485	2.593	2.72427	0.951818	0.341189
SLC22A9	0.933206	2.59295	2.70222	0.95956	0.337277
AHCYP2	1.64091	2.5923	1.89202	1.37012	0.17065
LOC101927584	0.403049	2.59216	3.1688	0.818026	0.413342
LOC101928923	0.403049	2.59216	3.1688	0.818026	0.413342
CHST2	150.21	2.59169	0.568897	4.55565	5.22241e-06
GRM1	1.27381	2.59004	1.95624	1.32399	0.185506
MAEL	1.1756	2.58971	2.2182	1.16748	0.243016
PARP1P2	1.26304	2.5891	1.92953	1.34183	0.17965
NOS1	1.28103	2.58827	2.55147	1.01442	0.310382
CYP1B1	393.858	2.58807	0.69839	3.70577	0.000210749
LOC105379641	0.401696	2.58768	3.16903	0.816555	0.414183
TAAR5	1.26867	2.58606	2.23977	1.15461	0.24825
MIR6854	2.43252	2.58548	2.02039	1.2797	0.200652
SNTG1	4.58129	2.58289	1.41155	1.82983	0.0672759
STARD4-AS1	1.70349	2.58139	2.04928	1.25966	0.207793
ADGRB1	0.399127	2.57912	3.16945	0.813743	0.415792
CALB2	0.399127	2.57912	3.16945	0.813743	0.415792
KCNG1	0.399127	2.57912	3.16945	0.813743	0.415792
KCNJ10	0.399127	2.57912	3.16945	0.813743	0.415792
KCNK3	0.399127	2.57912	3.16945	0.813743	0.415792
PCK1	0.399127	2.57912	3.16945	0.813743	0.415792
AKAP4	0.399127	2.57912	3.16945	0.813743	0.415792
CXCL14	0.399127	2.57912	3.16945	0.813743	0.415792
TBC1D12	0.399127	2.57912	3.16945	0.813743	0.415792
MTCL1	0.399127	2.57912	3.16945	0.813743	0.415792
CLIC6	0.399127	2.57912	3.16945	0.813743	0.415792
HMGCLL1	0.399127	2.57912	3.16945	0.813743	0.415792
ANKRD7	0.399127	2.57912	3.16945	0.813743	0.415792
TTYH1	0.399127	2.57912	3.16945	0.813743	0.415792
LRTM1	0.399127	2.57912	3.16945	0.813743	0.415792
TRIM46	0.399127	2.57912	3.16945	0.813743	0.415792
TMEM177	0.399127	2.57912	3.16945	0.813743	0.415792
TTTY5	0.399127	2.57912	3.16945	0.813743	0.415792
TNS4	0.399127	2.57912	3.16945	0.813743	0.415792
RPLP1P7	0.399127	2.57912	3.16945	0.813743	0.415792
IGSF11	0.399127	2.57912	3.16945	0.813743	0.415792
PLEKHG4B	0.399127	2.57912	3.16945	0.813743	0.415792
FAM27E5	0.399127	2.57912	3.16945	0.813743	0.415792
DUPD1	0.399127	2.57912	3.16945	0.813743	0.415792
NANOGNB	0.399127	2.57912	3.16945	0.813743	0.415792
LOC400940	0.399127	2.57912	3.16945	0.813743	0.415792
DKFZp451B082	0.399127	2.57912	3.16945	0.813743	0.415792
LOC401767	0.399127	2.57912	3.16945	0.813743	0.415792
LOC643201	0.399127	2.57912	3.16945	0.813743	0.415792
RPL35P8	0.399127	2.57912	3.16945	0.813743	0.415792
NR2F2-AS1	0.399127	2.57912	3.16945	0.813743	0.415792
LHFPL3-AS1	0.399127	2.57912	3.16945	0.813743	0.415792
ZRF1PS	0.399127	2.57912	3.16945	0.813743	0.415792
FRMPD2B	0.399127	2.57912	3.16945	0.813743	0.415792
LOC100129168	0.399127	2.57912	3.16945	0.813743	0.415792
RPL30P3	0.399127	2.57912	3.16945	0.813743	0.415792
LNCOC1	0.399127	2.57912	3.16945	0.813743	0.415792
RBBP4P5	0.399127	2.57912	3.16945	0.813743	0.415792
CUBNP3	0.399127	2.57912	3.16945	0.813743	0.415792
LINC00673	0.399127	2.57912	3.16945	0.813743	0.415792
LINC00366	0.399127	2.57912	3.16945	0.813743	0.415792
LOC101060098	0.399127	2.57912	3.16945	0.813743	0.415792
GPR1-AS	0.399127	2.57912	3.16945	0.813743	0.415792
LOC101927019	0.399127	2.57912	3.16945	0.813743	0.415792
LOC101927072	0.399127	2.57912	3.16945	0.813743	0.415792
RPSAP69	0.399127	2.57912	3.16945	0.813743	0.415792
LINC02075	0.399127	2.57912	3.16945	0.813743	0.415792
LINC01103	0.399127	2.57912	3.16945	0.813743	0.415792
ACSL6-AS1	0.399127	2.57912	3.16945	0.813743	0.415792
LINC01985	0.399127	2.57912	3.16945	0.813743	0.415792
LOC101928193	0.399127	2.57912	3.16945	0.813743	0.415792
LINC02334	0.399127	2.57912	3.16945	0.813743	0.415792
MIR7975	0.399127	2.57912	3.16945	0.813743	0.415792
LOC102723657	0.399127	2.57912	3.16945	0.813743	0.415792
LOC102724087	0.399127	2.57912	3.16945	0.813743	0.415792
LOC105369552	0.399127	2.57912	3.16945	0.813743	0.415792
LOC105369927	0.399127	2.57912	3.16945	0.813743	0.415792
LOC105369990	0.399127	2.57912	3.16945	0.813743	0.415792
LOC105370406	0.399127	2.57912	3.16945	0.813743	0.415792
LOC105370600	0.399127	2.57912	3.16945	0.813743	0.415792
LOC105370680	0.399127	2.57912	3.16945	0.813743	0.415792
LOC105371419	0.399127	2.57912	3.16945	0.813743	0.415792
LOC105371974	0.399127	2.57912	3.16945	0.813743	0.415792
LOC105372100	0.399127	2.57912	3.16945	0.813743	0.415792
LOC105372529	0.399127	2.57912	3.16945	0.813743	0.415792
LOC105372645	0.399127	2.57912	3.16945	0.813743	0.415792
LOC105372661	0.399127	2.57912	3.16945	0.813743	0.415792
LOC105372790	0.399127	2.57912	3.16945	0.813743	0.415792
LINC02558	0.399127	2.57912	3.16945	0.813743	0.415792
LOC105373100	0.399127	2.57912	3.16945	0.813743	0.415792
LOC105373504	0.399127	2.57912	3.16945	0.813743	0.415792
LOC105373891	0.399127	2.57912	3.16945	0.813743	0.415792
LOC105373949	0.399127	2.57912	3.16945	0.813743	0.415792
LOC105374803	0.399127	2.57912	3.16945	0.813743	0.415792
LOC105375450	0.399127	2.57912	3.16945	0.813743	0.415792
LOC105375544	0.399127	2.57912	3.16945	0.813743	0.415792
LOC105375588	0.399127	2.57912	3.16945	0.813743	0.415792
LOC105375901	0.399127	2.57912	3.16945	0.813743	0.415792
[truncated: 44,426 more rows]

## Sheet: Supplementary Data 5.
Gene name	Sequence
ACTA2	F	CCGGGAGAAAATGACTCAAA
	R	TACATGGCTGGGACATTGAA
CD177	F	CCAGAAGACCACCATCCACT
	R	TGGGTATAGGAGGCCACAAG
CD44	F	TGGGATTGGTTTTCATGGTT
	R	CGTACCAGCCATTTGTGTTG
CD69	F	CCGGAGAGTGGACAAGAAAA
	R	CGTGTTGAGAAATGGGGACT
CD274	F	TTTGGTTGTGGATCCAGTCA
	R	TGCTTGTCCAGATGACTTCG
HSPA1A	F	CCGAGAAGGACGAGTTTGAG
	R	CTGGTACAGTCCGCTGATGA
HSPA1B	F	CAAGATCACCATCACCAACG
	R	TCGTCCTCCGCTTTGTACTT
S100A12	F	GGCATTTTGACACCCTCTCT
	R	TGCAAGCTCCTTTGTAAGCA
